# Supplementary material for: Molecular dissection of PI3Kβ synergistic activation by receptor tyrosine kinases, GβGγ, and Rho-family GTPases
Source: eLife. 2024 May 7;12:RP88991. doi: 10.7554/eLife.88991 (PMC11076043; doi:10.7554/eLife.88991)
Supplement: Figure 1—figure supplement 1—source data 1. [file elife-88991-fig1-figsupp1-data1.xlsx]

## Sheet: Fig 1 - FS1B
Figure 1 -	Bulk membrane recruitment of GbGy-SNAP-AF488
figure supplement 1B
	time(sec)	mean intensity
	0	0
	10.001	1605.35
	20.003	3660.91
	30.004	4995.19
	40.005	6096.72
	50.006	7028.59
	60.008	7743.47
	70.009	8456.61
	80.01	9097.15
	90.011	9670.76
	100.013	10217.7
	110.014	10718.2
	120.015	11165.9
	130.016	11633.2
	140.018	12124.3
	150.019	12462.2
	160.02	12845
	170.021	13155.1
	180.023	13523.8
	190.024	13868.4
	200.025	14110.9
	210.026	14436.3
	220.028	14735
	230.029	14920.8
	240.03	15273.9
	250.031	15489.1
	260.033	15857.4
	270.034	16041.2
	280.035	16236.3
	290.036	16575.7
	300.038	16794.4
	310.039	16987.4
	320.04	17171.5
	330.041	17415.2
	340.043	17580.5
	350.044	17785.3
	360.045	17933.9
	370.046	18141.3
	380.048	18274.8
	390.049	18583.9
	400.05	18688
	410.051	18904.6
	420.053	18958.7
	430.054	19228.8
	440.055	19403.5
	450.056	19528.7
	460.058	19682.3
	470.059	19873.5
	480.06	19935.9
	490.061	20155.2
	500.063	20306.2
	510.064	20541.2
	520.065	20613.1
	530.067	20749.7
	540.068	20777.4
	550.069	21020.3
	560.07	21110.8
	570.072	21179.6
	580.073	21353.5
	590.074	21419.5
	600.075	21547.7
	610.077	21694.3
	620.078	21827.7
	630.079	21908.9
	640.08	22020.9
	650.082	22105.7
	660.083	22227.9
	670.084	22369.8
	680.085	22441.3
	690.087	22569.1
	700.088	22619.8
	710.089	22758.9
	720.09	22950.4
	730.092	22971.8
	740.093	23059.9
	750.094	23052.5
	760.095	23229.7
	770.097	23292.7
	780.098	23389.4
	790.099	23477.2
	800.1	23586.9
	810.102	23696
	820.103	23795.4
	830.104	23925.2
	840.105	23973.1
	850.107	24068.8
	860.108	24077
	870.109	24129.2
	880.11	24286.2
	890.112	24384.5
	900.113	24348.7
	910.114	24481.1
	920.115	24596.6
	930.117	24657.3
	940.118	24829.6
	950.119	24907.4
	960.12	24939.4
	970.122	25039.8
	980.123	25062.1
	990.124	25082.9
	1000.12	25154.2
	1010.13	25222.8
	1020.13	25252.5
	1030.13	25270.6
	1040.13	25482.4
	1050.13	25534.2
	1060.13	25568.8
	1070.13	25581.2
	1080.13	25689.1
	1090.14	25786.3
	1100.14	25695.3
	1110.14	25806.9
	1120.14	25873
	1130.14	26027.4
	1140.14	26008.5
	1150.14	25995
	1160.15	26053
	1170.15	26179.9
	1180.15	26218.8
	1190.15	26243.9
	1200.15	26310.8
	1210.15	26383.3
	1220.15	26277.4
	1230.15	26431.5
	1240.16	26459
	1250.16	26532.8
	1260.16	26528.1
	1270.16	26694.6
	1280.16	26733.5
	1290.16	26733.9
	1300.16	26849.2
	1310.16	26872.4
	1320.17	26872.7
	1330.17	26901.6
	1340.17	27014.3
	1350.17	27110.3
	1360.17	27110.9
	1370.17	27197
	1380.17	27251.6
	1390.17	27253.7
	1400.18	27206
	1410.18	27229.2
	1420.18	27250
	1430.18	27344.8
	1440.18	27404.5
	1450.18	27449.1
	1460.18	27458.7
	1470.18	27543.4
	1480.19	27479.6
	1490.19	27554.4
	1500.19	27519.6
	1510.19	27735.5
	1520.19	27773.3
	1530.19	27669.2
	1540.19	27748.4
	1550.19	27734
	1560.2	27772.7
	1570.2	27811.8
	1580.2	27904.8
	1590.2	27961.3
	1600.2	27945.6
