# Supplementary material for: Molecular dissection of PI3Kβ synergistic activation by receptor tyrosine kinases, GβGγ, and Rho-family GTPases
Source: eLife. 2024 May 7;12:RP88991. doi: 10.7554/eLife.88991 (PMC11076043; doi:10.7554/eLife.88991)
Supplement: Figure 1—figure supplement 2—source data 1. [file elife-88991-fig1-figsupp2-data1.xlsx]

## Sheet: Fig 1 - FS2A
Figure 1 -		Bulk membrane recruitment of Dy647-PI3KB, plus pY
figure supplement 2A
	[sec]	MC1	MC2		Membrane lipid composition #1 (MC1): 91% DOPC, 5% DOPS, 2% PI(4,5)P2, 2% MCC-PE (blue line)
	0	0	0		Membrane lipid composition #2 (MC2): 75% DOPC, 20% DOPS, 2% PI(4,5)P2, 2% MCC-PE (red line)
	10	2365.57	1380.1
	20	3530.49	2678.63
	30	4196.86	3439.97
	40	4904.71	4013.73
	50	5397.83	4345.63
	60	5799.33	4696.87
	70	6221.14	4984.41
	79.999	6557.15	5298.14
	89.999	6842.88	5524.04
	99.999	7105.71	5751.69
	109.999	7335.53	5919.22
	119.999	7521.89	6160.94
	129.999	7686.09	6356.23
	139.999	8036.62	6530.27
	149.999	8243.31	6563.24
	159.999	8359.53	6689
	169.999	8531.91	6865.9
	179.999	8723.56	6790.69
	189.999	8870.93	6871.77
	199.999	8966.12	7027.66
	209.999	9184.92	7234.19
	219.999	9327.71	7352.29
	229.998	9427.92	7452.86
	239.998	9689.62	7589.17
	249.998	9682.21	7603.12
	259.998	9841.85	7733.4
	269.998	9966.94	7815.96
	279.998	9998.43	7983.34
	289.998	9800.44	8047.19
	299.998	9835.19	8127.76
	309.998	10006.7	8164.53
	319.998	10458.9	8242.29
	329.998	10579.3	8238.95
	339.998	10615.5	8322.4
	349.998	10714.9	8454.52
	359.998	10842	8491.42
	369.998	10973.1	8617
	379.997	11145	8590.07
	389.997	11097.9	8666.72
	399.997	11190.3	8718.71
	409.997	11260.1	8850.79
	419.997	11292.9	8941.27
	429.997	11370.3	8940.02
	439.997	11510.5	8940.58
	449.997	11572.8	9002.21
	459.997	11686.7	9142.43
	469.997	11666.2	9163.4
	479.997	11797.6	9205.55
	489.997	11834.8	8918.43
	499.997	11894.2	8971.3
	509.997	12024.2	9227.96
	519.997	12133	9353.3
	529.996	12058.9	9383.7
	539.996	12201.5	9325.53
	549.996	12218.3	9399.93
	559.996	12369.2	9448.32
	569.996	12452.9	9547.45
	579.996	12403.2	9732.57
	589.996	12641	9804.44
	599.996	12579.6	9761.66
	609.996	12615.4	9713.05
	619.996	12645.3	9732.68
	629.996	12666.6	9687.23
	639.996	12812.2	9740.58
	649.996	12373	9803.11
	659.996	12426.3	9779
	669.996	12947	9833.82
	679.995	13047.2	9811.32
	689.995	13131.1	9845.52
	699.995	12990.4	9856.99
	709.995	12976.4	9852.22
	719.995	13121.4	9827.91
	729.995	13144.5	9840.11
	739.995	13282.2	9971.15
	749.995	13294.4	10024
	759.995	13192.9	9994.78
	769.995	13351.6	10018.1
	779.995	13306.7	9748.21
	789.995	13264.8	10110.6
	799.995	13378	10158.4
	809.995	13357.1	10119.3
	819.995	13447.5	10172.3
	829.994	13456.7	10173
	839.994	13610.8	10217.9
	849.994	13552.6	10215.1
	859.994	13562.7	10266.6
	869.994	13638	10294.5
	879.994	13720.1	10294.8
	889.994	13761.4	10255.7
	899.994	13764.8	10375.2
	909.994	13747.5	10435.5
	919.994	13839.3	10454.7
	929.994	13937.1
