# Supplementary material for: Molecular dissection of PI3Kβ synergistic activation by receptor tyrosine kinases, GβGγ, and Rho-family GTPases
Source: eLife. 2024 May 7;12:RP88991. doi: 10.7554/eLife.88991 (PMC11076043; doi:10.7554/eLife.88991)
Supplement: Figure 1—figure supplement 2—source data 4. [file elife-88991-fig1-figsupp2-data4.xlsx]

## Sheet: Fig 1 - FS2D
Figure 1 -	Single molecule dwell time distribution
figure supplement 2D									mov1	mov2	mov1/2	mov1	mov2	mov1	mov2
	movie	mov1	mov2	AVE	SD				RAW Dwell time (sec)	RAW Dwell time (sec)	BIN (sec)	freq	freq	1-CDF	1-CDF
	alpha	0.8836	0.9027	0.89315	0.0135057				0.130449	0.0434831	0.044	0.414163	0.394619	0.585837	0.605381
10 nM Dy647-PI3KB	T1 (sec)	0.07025	0.07224	0.071245	0.00140714				0.108708	0.0217415	0.066	0.55794	0.565022	0.44206	0.434978
lipids only	T2 (sec)	0.2318	0.4064	0.3191	0.123461				0.108708	1.52191	0.088	0.678112	0.679372	0.321888	0.320628
	N	941	880	1821					0.0217415	0.0652246	0.11	0.755365	0.7287	0.244635	0.2713
	AVE DT (sec)	0.104369	0.119627	0.111998	0.0107894				0.0217415	0.0217415	0.132	0.806867	0.782511	0.193133	0.217489
									0.0652246	0.500055	0.154	0.849785	0.816143	0.150215	0.183857
only molecules that could be tracked to at least 2 frames (44 ms) were included in analysis									0.0434831	1.04359	0.176	0.869099	0.849776	0.130901	0.150224
AVE DT (sec) = average or mean dwell time for the entire population of molecules									0.0217415	0.0434831	0.198	0.89485	0.883408	0.10515	0.116592
									0.543538	0.0434831	0.22	0.912017	0.90583	0.0879828	0.0941704
									0.0217415	0.0434831	0.242	0.929185	0.921525	0.0708155	0.0784753
									0.0434831	0.0217415	0.264	0.939914	0.926009	0.0600858	0.073991
									0.0217415	0.0217415	0.286	0.948498	0.934978	0.0515021	0.0650224
									0.0434831	0.0217415	0.308	0.957082	0.939462	0.0429185	0.0605381
									0.0869661	0.0217415	0.33	0.961373	0.943946	0.0386266	0.0560538
									0.0434831	0.0217415	0.352	0.963519	0.952915	0.0364807	0.0470852
									0.0434831	0.108708	0.374	0.969957	0.952915	0.0300429	0.0470852
									0.0217415	0.0217415	0.396	0.974249	0.957399	0.0257511	0.0426009
									0.0434831	0.0434831	0.418	0.980687	0.957399	0.0193133	0.0426009
									0.0217415	0.28264	0.44	0.980687	0.961883	0.0193133	0.0381166
									0.0217415	0.500055	0.462	0.980687	0.966368	0.0193133	0.0336323
									0.0217415	0.0217415	0.484	0.984979	0.96861	0.0150215	0.0313901
									0.0217415	0.0217415	0.506	0.987124	0.973094	0.0128755	0.0269058
									0.0434831	0.0217415	0.528	0.987124	0.977578	0.0128755	0.0224215
									0.0217415	0.217415	0.55	0.991416	0.979821	0.00858369	0.0201794
									0.0217415	0.0217415	0.572	0.993562	0.979821	0.00643777	0.0201794
									0.0652246	0.0217415	0.594	0.993562	0.979821	0.00643777	0.0201794
									0.0217415	0.0217415	0.616	0.993562	0.979821	0.00643777	0.0201794
									0.130449	0.152191	0.638	0.993562	0.979821	0.00643777	0.0201794
									0.108708	0.0217415	0.66	0.993562	0.979821	0.00643777	0.0201794
									0.0434831	0.0652246	0.682	0.993562	0.982063	0.00643777	0.0179372
									0.0434831	0.0434831	0.704	0.993562	0.982063	0.00643777	0.0179372
									0.217415	0.0434831	0.726	0.993562	0.984305	0.00643777	0.0156951
									0.0434831	0.130449	0.748	0.995708	0.984305	0.00429185	0.0156951
									0.0434831	0.0217415	0.77	0.995708	0.986547	0.00429185	0.0134529
									0.0217415	0.0652246	0.792	0.995708	0.986547	0.00429185	0.0134529
									0.0217415	0.0217415	0.814	0.995708	0.986547	0.00429185	0.0134529
									0.0434831	0.0434831	0.836	0.997854	0.986547	0.00214592	0.0134529
									0.108708	0.260898	0.858	0.997854	0.986547	0.00214592	0.0134529
									0.0869661	0.195674	0.88	0.997854	0.986547	0.00214592	0.0134529
									0.239157	0.0217415	0.902	1	0.986547	0	0.0134529
									0.0217415	0.304381	0.924	1	0.988789	0	0.0112108
									0.0217415	0.304381	0.946	1	0.988789	0	0.0112108
									0.217415	0.0434831	0.968	1	0.991031	0	0.00896861
									0.0217415	0.0217415	0.99	1	0.991031	0	0.00896861
									0.0217415	0.0434831	1.012	1	0.991031	0	0.00896861
									0.0217415	0.0434831	1.034	1	0.993274	0	0.00672646
									0.0217415	0.0217415	1.056	1	0.993274	0	0.00672646
									0.0217415	0.0217415	1.078	1	0.993274	0	0.00672646
									0.260898	0.217415	1.1	1	0.993274	0	0.00672646
									0.0217415	0.0652246	1.122	1	0.993274	0	0.00672646
									0.108708	0.0652246	1.144	1	0.993274	0	0.00672646
									0.0434831	0.0217415	1.166	1	0.995516	0	0.0044843
									0.0869661	0.0217415	1.188	1	0.995516	0	0.0044843
									0.0217415	0.0434831	1.21	1	0.995516	0	0.0044843
									0.0217415	0.0217415	1.232	1	0.995516	0	0.0044843
									0.0217415	0.0652246	1.254	1	0.995516	0	0.0044843
									0.0217415	0.0217415	1.276	1	0.995516	0	0.0044843
									0.0217415	0.0652246	1.298	1	0.995516	0	0.0044843
									0.152191	0.0217415	1.32	1	0.995516	0	0.0044843
									0.0434831	0.0217415	1.342	1	0.995516	0	0.0044843
									0.0434831	0.0217415	1.364	1	0.997758	0	0.00224215
									0.0217415	0.0217415	1.386	1	0.997758	0	0.00224215
									0.0217415	0.0217415	1.408	1	0.997758	0	0.00224215
									0.0217415	0.0217415	1.43	1	0.997758	0	0.00224215
									0.0652246	0.0434831	1.452	1	0.997758	0	0.00224215
									0.0217415	0.0217415	1.474	1	0.997758	0	0.00224215
									0.0869661	0.0434831	1.496	1	0.997758	0	0.00224215
									0.0217415	0.0217415	1.518	1	1	0	0
									0.0217415	0.0217415
									0.0434831	0.0869661
									0.0434831	0.0217415
									0.0217415	0.0217415
									0.0217415	0.0217415
									0.0434831	0.0434831
									0.0434831	0.0217415
									0.891403	0.0217415
									0.0434831	0.0217415
									0.0217415	0.0217415
									0.0217415	0.978369
									0.0434831	0.0217415
									0.152191	0.0434831
									0.0434831	0.0217415
									0.0217415	0.0217415
									0.0217415	0.0869661
									0.195674	0.0217415
									0.0217415	0.0217415
									0.0434831	0.173932
									0.0217415	0.0434831
									0.0869661	0.108708
									0.0217415	0.0217415
									0.0869661	0.0217415
									0.0434831	0.0217415
									0.130449	0.0217415
									0.0434831	0.0869661
									0.0217415	0.0217415
									0.239157	0.0217415
									0.0217415	0.0652246
									0.0217415	0.108708
									0.28264	0.0217415
									0.0217415	0.0217415
									0.0652246	0.0217415
									0.0217415	0.0217415
									0.0869661	0.108708
									0.130449	0.0869661
									0.0217415	0.0869661
									0.0217415	0.0217415
									0.0434831	0.217415
									0.0217415	0.0652246
									0.0217415	0.0434831
									0.0217415	0.0217415
									0.0217415	0.0434831
									0.739212	0.0217415
									0.0217415	0.0217415
									0.0434831	0.0217415
									0.0869661	0.260898
									0.0434831	0.0217415
									0.0217415	0.0217415
									0.0217415	0.0217415
									0.0434831	0.0217415
									0.0869661	0.0217415
									0.0217415	0.0217415
									0.0217415	0.108708
									0.0217415	0.0217415
									0.0434831	0.0652246
									0.0217415	0.0217415
									0.0217415	0.0434831
									0.195674	0.0217415
									0.0217415	0.0652246
									0.0217415	0.0217415
									0.0652246	0.130449
									0.0434831	0.0217415
									0.0217415	0.130449
									0.0217415	0.0434831
									0.0217415	0.0434831
									0.0217415	0.0217415
									0.0217415	0.0434831
									0.0652246	0.0217415
									0.0217415	0.0217415
									0.0434831	0.0217415
									0.0217415	0.173932
									0.0217415	0.0217415
									0.0217415	0.0217415
									0.0869661	0.0652246
									0.0217415	0.0217415
									0.0217415	0.108708
									0.0217415	0.347864
									0.0217415	0.0869661
									0.0434831	0.108708
									0.0217415	0.0217415
									0.0652246	0.0217415
									0.0217415	0.0217415
									0.0217415	0.0217415
									0.0217415	0.0652246
									0.0217415	0.0217415
									0.0217415	0.0434831
									0.0217415	0.0217415
									0.0217415	0.0869661
									0.0434831	0.108708
									0.195674	0.0217415
									0.0217415	0.28264
									0.0217415	0.0217415
									0.0217415	0.239157
									0.0434831	0.0217415
									0.0217415	0.0217415
									0.0217415	0.0217415
									0.217415	0.0217415
									0.326123	0.217415
									0.0434831	0.108708
									0.0434831	0.0434831
									0.0869661	0.0869661
									0.0652246	0.195674
									0.0434831	0.0217415
									0.152191	0.0217415
									0.0217415	0.0652246
									0.0434831	0.0869661
									0.130449	0.347864
									0.0434831	0.0217415
									0.0434831	0.0217415
									0.0217415	0.0217415
									0.0434831	0.173932
									0.0217415	0.71747
									0.0217415	0.0217415
									0.0217415	0.0217415
									0.0217415	0.0652246
									0.0217415	0.0434831
									0.0217415	0.0652246
									0.108708	0.0869661
									0.0217415	0.0434831
									0.0217415	0.0217415
									0.0217415	0.0434831
									0.28264	1.36972
									0.0217415	0.0434831
									0.152191	0.0434831
									0.0652246	0.173932
									0.217415	0.0869661
									0.347864	0.0652246
									0.152191	0.152191
									0.260898	0.0434831
									0.0217415	0.108708
									0.0217415	0.0434831
									0.0217415	0.0434831
									0.0217415	0.173932
									0.0652246	0.0217415
									0.0217415	0.108708
									0.0217415	0.0217415
									0.0869661	0.0434831
									0.413089	0.0434831
									0.0217415	0.0869661
									0.0217415	0.0217415
									0.0217415	0.239157
									0.0652246	0.0869661
									0.195674	0.195674
									0.0217415	0.0217415
									0.0217415	0.0217415
									0.239157	0.0652246
									0.0434831	0.0217415
									0.0217415	0.0217415
									0.0434831	0.0652246
									0.0434831	0.0217415
									0.195674	0.0434831
									0.0217415	0.0217415
									0.0217415	0.0217415
									0.0869661	0.130449
									0.0217415	0.0434831
									0.0217415	0.0652246
									0.0217415	0.0869661
									0.0434831	0.130449
									0.0217415	0.434831
									0.0217415	0.173932
									0.0217415	0.0217415
									0.0434831	0.152191
									0.0217415	0.0434831
									0.0434831	0.0869661
									0.0217415	0.195674
									0.0652246	0.0217415
									0.0652246	0.0217415
									0.0217415	0.0434831
									0.0434831	0.0434831
									0.0434831	0.217415
									0.0217415	0.0217415
									0.0217415	0.0217415
									0.0217415	0.0434831
									0.0652246	0.0217415
									0.0652246	0.0217415
									0.0652246	0.0434831
									0.195674	0.0869661
									0.0217415	0.0434831
									0.326123	0.0652246
									0.0434831	0.0434831
									0.0434831	0.152191
									0.108708	0.0434831
									0.0217415	0.108708
									0.0217415	0.0869661
									0.0217415	0.195674
									0.0217415	0.0434831
									0.130449	0.108708
									0.0652246	0.0217415
									0.0217415	0.0217415
									0.0217415	0.0652246
									0.0217415	0.0217415
									0.0217415	0.0217415
									0.0652246	0.239157
									0.152191	0.0434831
									0.108708	0.0217415
									0.0217415	0.0869661
									0.0217415	0.0434831
									0.0434831	0.0434831
									0.0652246	0.0434831
									0.0434831	0.0434831
									0.0217415	0.0217415
									0.0217415	0.0217415
									0.0217415	0.521797
									0.0652246	0.108708
									0.0217415	0.173932
									0.130449	0.0434831
									0.0217415	0.0434831
									0.0217415	0.0652246
									0.0652246	0.0217415
									0.0217415	0.0217415
									0.0217415	0.0217415
									0.0869661	0.0652246
									0.0217415	0.0869661
									0.0869661	0.0434831
									0.0217415	0.0217415
									0.0434831	0.0217415
									0.260898	0.130449
									0.0217415	0.0652246
									0.0434831	0.108708
									0.0217415	0.217415
									0.173932	0.0217415
									0.0869661	0.0434831
									0.0217415	0.0217415
									0.0217415	0.0869661
									0.0217415	0.0217415
									0.130449	0.0434831
									0.0217415	0.0217415
									0.0217415	0.0652246
									0.0217415	0.0217415
									0.0217415	0.0434831
									0.0217415	0.0217415
									0.0217415	0.0434831
									0.391348	0.195674
									0.130449	0.0434831
									0.28264	0.0217415
									0.0434831	0.0434831
									0.195674	0.0217415
									0.0434831	0.0217415
									0.130449	0.0652246
									0.0217415	0.0434831
									0.0217415	0.173932
									0.0434831	0.0434831
									0.130449	0.0434831
									0.0217415	0.0434831
									0.130449	0.0217415
									0.130449	0.0869661
									0.217415	0.456572
									0.108708	0.0217415
									0.369606	0.173932
									0.260898	0.0217415
									0.0217415	0.0434831
									0.195674	0.0217415
									0.0217415	0.0217415
									0.0217415	0.0217415
									0.0217415	0.0434831
									0.0217415	0.0217415
									0.239157	0.0434831
									0.0217415	0.0217415
									0.0869661	0.130449
									0.0434831	0.0217415
									0.0434831	0.0217415
									0.108708	0.0217415
									0.0434831	0.0217415
									0.0652246	0.0217415
									0.0434831	0.0652246
									0.152191	0.0217415
									0.0217415	0.0652246
									0.0434831	0.0217415
									0.0652246	0.0652246
									0.0217415	0.0217415
									0.0652246	0.0869661
									0.413089	0.0217415
									0.0217415	0.0217415
									0.0434831	0.0217415
									0.0434831	0.0217415
									0.0434831	0.0217415
									0.0434831	0.0869661
									0.0217415	0.0217415
									0.0434831	0.0217415
									0.0217415	0.0217415
									0.0217415	0.0217415
									0.0434831	0.0217415
									0.0869661	0.0434831
									0.0652246	0.152191
									0.0217415	0.0217415
									0.0217415	0.0217415
									0.0869661	0.0217415
									0.0869661	0.0217415
									0.0217415	0.0217415
									0.0217415	0.0217415
									0.0217415	0.0434831
									0.108708	0.347864
									0.0434831	0.0217415
									0.0652246	0.0434831
									0.0217415	0.0217415
									0.0217415	0.673987
									0.0217415	0.0217415
									0.0434831	0.0217415
									0.0217415	0.0434831
									0.130449	0.0217415
									0.0217415	0.0217415
									0.0217415	0.0869661
									0.0217415	0.0217415
									0.0869661	0.0869661
									0.0217415	0.0217415
									0.0217415	0.0217415
									0.0434831	0.0652246
									0.0217415	0.0652246
									0.0217415	0.0434831
									0.0434831	0.0217415
									0.0434831	0.0217415
									0.0434831	0.0869661
									0.152191	0.0652246
									0.0217415	0.0217415
									0.0434831	0.0652246
									0.0217415	0.0434831
									0.0217415	0.0434831
									0.108708	0.0217415
									0.0434831	0.0434831
									0.0652246	0.0217415
									0.0217415	0.0217415
									0.0217415	0.0217415
									0.500055	0.0652246
									0.0217415	0.152191
									0.0434831	0.130449
									0.0217415	0.0217415
									0.0217415	0.326123
									0.130449	0.0652246
									0.0217415	0.0217415
									0.0217415	0.0217415
									0.0217415	0.0217415
									0.0217415	0.0217415
									0.0217415	0.0869661
									0.0217415	0.0217415
									0.0652246	0.0217415
									0.0217415	0.0434831
									0.0217415	0.108708
									0.0217415	0.0217415
									0.0217415	0.0217415
									0.152191	0.0217415
									0.0434831	0.0217415
									0.108708	0.0217415
									0.0434831	0.0652246
									0.0434831	0.195674
									0.0217415	0.0434831
									0.0217415	0.0217415
									0.0652246	0.0652246
									0.0434831	0.391348
									0.0217415	0.217415
									0.0434831	0.0217415
									0.0434831	0.0217415
									0.0217415	0.152191
									0.0434831	0.0217415
									0.108708	0.0217415
									0.0217415	0.195674
									0.0217415	0.0217415
									0.0217415	0.0217415
									0.0217415	0.0217415
									0.0434831	0.0217415
									0.0434831	0.0652246
									0.0217415	0.0217415
									0.0434831	0.0869661
									0.0217415	0.0217415
									0.0217415	0.0217415
									0.0217415	0.0217415
									0.0217415	0.0217415
									0.108708	0.0217415
									0.0652246	0.0434831
									0.0217415	0.173932
									0.0217415	0.0217415
									0.0869661	0.0434831
									0.56528	0.0217415
									0.108708	0.0217415
									0.0217415	0.0434831
									0.478314	0.0217415
									0.0217415	0.0217415
									0.0869661	0.0217415
									0.0217415	0.0217415
									0.0217415	0.0217415
									0.0217415	0.456572
									0.0217415	0.0217415
									0.0652246	0.0217415
									0.0869661	0.0217415
									0.0217415	0.0434831
									0.0217415	0.0652246
									0.0217415	0.108708
									0.0869661	0.0869661
									0.0652246	0.0217415
									0.0434831	0.0869661
									0.0217415	0.0217415
									0.0434831	0.0217415
									0.0652246	0.0434831
									0.0869661	0.0434831
									0.0869661	0.0217415
									0.0869661	0.0652246
									0.108708	0.0217415
									0.0652246	0.0217415
									0.0869661	0.0434831
									0.0217415	0.0217415
									0.0217415	0.0652246
									0.0217415	0.0217415
									0.173932	0.0217415
									0.0869661	0.0217415
									0.0434831	0.0652246
									0.0434831	0.152191
									0.0434831	0.0652246
									0.0434831	0.0217415
									0.0434831	0.0652246
									0.0652246	0.0217415
									0.0217415	0.0434831
									0.0434831	0.0434831
									0.0869661	0.0434831
									0.0217415	0.0217415
									0.0217415	0.0217415
									0.0217415	0.152191
									0.0217415	0.0217415
									0.130449	0.0217415
									0.0217415	0.0217415
									0.0434831	0.934886
									0.0217415	0.0217415
									0.0217415	0.0217415
									0.0434831	0.0434831
									0.0434831	0.0217415
									0.130449	0.195674
									0.0217415	0.0217415
									0.0217415	0.0217415
									0.0217415	0.0434831
									0.0217415	0.0217415
									0.0217415	0.0217415
									0.0217415	0.0217415
									0.0217415	0.0217415
									0.173932	0.130449
									0.0217415	0.0217415
									0.0217415	0.0217415
									0.0217415	0.0217415
									0.0217415	0.0434831
									0.0217415	0.0434831
									0.0217415	0.0652246
									0.0217415	0.0217415
									0.0217415	0.0434831
									0.0217415	0.0217415
									0.0217415	0.0217415
									0.0217415	0.0217415
									0.108708	0.152191
									0.0652246	0.0217415
									0.0217415	0.0434831
									0.0217415	0.0652246
									0.239157	0.0652246
									0.0217415	0.0217415
									0.0434831	0.0217415
									0.152191	0.0217415
									0.0434831	0.0869661
									0.108708	0.0217415
									0.0217415	0.0217415
									0.0434831	0.0217415
									0.0217415	0.0217415
									0.0217415	0.0217415
									0.130449	0.0217415
									0.0217415	0.0652246
									0.0217415	0.0652246
									0.0434831	0.0434831
									0.0434831	0.0217415
									0.130449	0.0652246
									0.108708	0.0217415
									0.0217415	0.0434831
									0.0217415	0.0434831
									0.0869661	0.0434831
									0.0869661	0.0217415
									0.0217415	0.0217415
									0.130449	0.0434831
									0.0434831	0.0869661
									0.0434831	0.130449
									0.108708	0.0217415
									0.0217415	0.0652246
									0.0217415	0.0217415
									0.0434831	0.173932
									0.260898	0.0652246
									0.239157	0.0217415
									0.108708	0.130449
									0.0652246	0.130449
									0.0217415	0.0217415
									0.0217415	0.0434831
									0.0217415	0.0652246
									0.0217415	0.0217415
									0.478314	0.0434831
									0.152191	0.0217415
									0.217415	0.130449
									0.0217415	0.0217415
									0.0217415	0.0217415
									0.0217415	0.0434831
									0.0434831	0.0434831
									0.0217415	0.0217415
									0.0217415	0.0217415
									0.0217415	0.0217415
									0.0217415	0.0434831
									0.0217415	0.0217415
									0.0434831	0.0217415
									0.0434831	0.173932
									0.0434831	0.0217415
									0.0217415	0.0217415
									0.0217415	0.0652246
									0.108708	0.0217415
									0.0217415	0.0217415
									0.0217415	0.0217415
									0.0869661	0.0217415
									0.0434831	0.0434831
									0.0217415	0.195674
									0.0217415	0.760954
									0.108708	0.0869661
									0.0217415	0.0434831
									0.0434831	0.0217415
									0.0434831	0.0869661
									0.108708	0.0217415
									0.0217415	0.0434831
									0.0652246	0.0434831
									0.0217415	0.0434831
									0.0217415	0.130449
									0.0434831	0.0434831
									0.0652246	0.130449
									0.0217415	0.0217415
									0.0217415	0.0217415
									0.0434831	0.108708
									0.0217415	0.0217415
									0.0217415	0.0217415
									0.0869661	0.0217415
									0.0869661	0.0869661
									0.0434831	0.0217415
									0.0652246	0.0434831
									0.0217415	0.0217415
									0.0652246	0.130449
									0.152191	0.130449
									0.0217415	0.0217415
									0.0434831	0.0434831
									0.0217415	0.0434831
									0.0217415	0.0217415
									0.217415	0.0652246
									0.0217415	0.0217415
									0.0217415	0.0217415
									0.0217415	0.0217415
									0.0434831	0.0434831
									0.0434831	0.0217415
									0.0217415	0.0217415
									0.0217415	0.0434831
									0.0217415	0.0217415
									0.0217415	0.0217415
									0.0217415	0.0217415
									0.0217415	0.0217415
									0.152191	0.0217415
									0.0217415	0.0217415
									0.0217415	0.0217415
									0.0434831	0.0217415
									0.0217415	0.130449
									0.0217415	0.0869661
									0.0217415	0.0217415
									0.0217415	0.0652246
									0.0217415	0.0434831
									0.0869661	0.0869661
									0.130449	0.0434831
									0.0217415	0.0434831
									0.0217415	0.0217415
									0.0217415	0.0869661
									0.0217415	0.521797
									0.0217415	0.0434831
									0.0434831	0.434831
									0.108708	0.0869661
									0.0217415	0.130449
									0.0217415	0.0652246
									0.108708	0.0434831
									0.0652246	0.0869661
									0.0217415	0.0217415
									0.0217415	0.0869661
									0.108708	0.0217415
									0.0217415	0.0434831
									0.0434831	0.0217415
									0.0217415	0.0434831
									0.0217415	0.0217415
									0.413089	0.0434831
									0.0434831	0.0434831
									0.0217415	0.195674
									0.0434831	0.173932
									0.0217415	0.0217415
									0.0217415	0.0652246
									0.108708	0.0434831
									0.0217415	0.195674
									0.0217415	1.17404
									0.0652246	0.0434831
									0.152191	0.0434831
									0.0217415	0.239157
									0.0217415	0.0217415
									0.0217415	0.0217415
									0.0434831	0.0434831
									0.0434831	0.0434831
									0.0217415	0.0217415
									0.0217415	0.0217415
									0.0652246	0.0217415
									0.0217415	0.0217415
									0.0217415	0.0217415
									0.304381	0.0434831
									0.0434831	0.0217415
									0.0434831	0.0217415
									0.0434831	0.0217415
									0.0217415	0.0869661
									0.0217415	0.0217415
									0.0217415	0.0652246
									0.0869661	0.0217415
									0.0217415	0.0869661
									0.0434831	0.0217415
									0.0217415	0.0434831
									0.0217415	0.0217415
									0.0434831	0.0217415
									0.0434831	0.0434831
									0.0652246	0.0652246
									0.0434831	0.0217415
									0.0652246	0.0217415
									0.0217415	0.0217415
									0.0869661	0.0434831
									0.0217415	0.0217415
									0.0217415	0.0217415
									0.0434831	0.0434831
									0.130449	0.0434831
									0.0217415	0.0217415
									0.0217415	0.0434831
									0.0217415	0.0217415
									0.0869661	0.0217415
									0.369606	0.195674
									0.0217415	0.0217415
									0.0652246	0.347864
									0.0217415	0.0434831
									0.0652246	0.0869661
									0.0869661	0.0652246
									0.0217415	0.0217415
									0.0217415	0.0217415
									0.0217415	0.0434831
									0.0217415	0.0434831
									0.826178	0.0217415
									0.0217415	0.0652246
									0.0217415	0.0217415
									0.0869661	0.239157
									0.0217415	0.152191
									0.0217415	0.0217415
									0.0217415	0.108708
									0.0217415	0.0217415
									0.0217415	0.0217415
									0.0434831	0.0217415
									0.239157	0.0217415
									0.0434831	0.130449
									0.0434831	0.0217415
									0.0434831	0.0217415
									0.0869661	0.0652246
									0.0217415	0.173932
									0.0434831	0.0434831
									0.0217415	0.0217415
									0.0217415	0.239157
									0.217415	0.0217415
									0.0869661	0.0217415
									0.0217415	0.0217415
									0.0434831	0.0217415
									0.304381	0.0217415
									0.0434831	0.0217415
									0.0217415	0.0217415
									0.0217415	0.0652246
									0.0652246	0.0217415
									0.0217415	0.0217415
									0.0869661	0.0217415
									0.0217415	0.0217415
									0.0652246	0.0217415
									0.0869661	0.130449
									0.0434831	0.0217415
									0.0434831	0.0217415
									0.304381	0.0869661
									0.0217415	0.0217415
									0.0434831	0.0652246
									0.195674	0.0652246
									0.0217415	0.391348
									0.0434831	0.0217415
									0.0217415	0.0869661
									0.0217415	0.0434831
									0.0434831	0.130449
									0.0217415	0.0434831
									0.0217415	0.0217415
									0.0869661	0.0217415
									0.0217415	0.0217415
									0.0434831	0.0217415
									0.0217415	0.28264
									0.108708	0.0434831
									0.0217415	0.0217415
									0.0217415	0.326123
									0.0434831	0.0434831
									0.0217415	0.0217415
									0.0217415	0.0434831
									0.0217415	0.0434831
									0.0217415	0.0217415
									0.0217415	0.0434831
									0.0217415	0.0217415
									0.0217415	0.0217415
									0.0217415	0.0217415
									0.0434831	0.0217415
									0.0217415	0.130449
									0.0217415	0.0434831
									0.0217415	0.0217415
									0.0652246	0.0434831
									0.0434831	0.0217415
									0.152191	0.130449
									0.0434831	0.0217415
									0.0652246	0.0217415
									0.0869661	0.0217415
									0.0217415	0.0652246
									0.195674	0.0652246
									0.0434831	0.0434831
									0.0434831	0.0217415
									0.0217415	0.0652246
									0.0217415	0.0434831
									0.0434831	0.195674
									0.0217415	0.0217415
									0.0217415	0.0434831
									0.173932	0.0434831
									0.0217415	0.0217415
									0.0217415	0.0652246
									0.0217415	0.0217415
									0.0217415	0.0217415
									0.0217415	0.0869661
									0.0217415	0.0217415
									0.0217415	0.0217415
									0.152191	0.0217415
									0.0434831	0.0434831
									0.0217415	0.0434831
									0.0217415	0.0217415
									0.0217415	0.0217415
									0.108708	0.0217415
									0.304381	0.0434831
									0.0434831	0.0217415
									0.0217415	0.0434831
									0.0652246	0.0652246
									0.0217415	0.0434831
									0.0434831	0.0434831
									0.0434831	0.0217415
									0.0434831	0.0217415
									0.0217415	0.0434831
									0.0217415	0.0217415
									0.0217415	0.152191
									0.0217415	0.0434831
									0.0652246	0.173932
									0.152191	0.0217415
									0.0217415	0.0217415
									0.108708	0.108708
									0.0217415	0.0434831
									0.0652246	0.0434831
									0.0652246	0.0217415
									0.130449	0.0217415
									0.0434831	0.0217415
									0.173932	0.239157
									0.0434831	0.0652246
									0.108708	0.108708
									0.195674	0.0434831
									0.239157	0.0434831
									0.0217415	0.0434831
									0.0869661	0.0217415
									0.391348	0.543538
									0.173932	0.217415
									0.0434831	0.152191
									0.0434831	0.0434831
									0.0434831	0.0434831
									0.0217415	0.478314
									0.0217415	0.0434831
									0.0217415	0.0652246
									0.0217415	0.0434831
									0.0217415	0.0217415
									0.130449	0.217415
									0.0217415	0.0217415
									0.0217415	0.0217415
									0.0217415	0.0434831
									0.152191	0.0869661
									0.0217415	0.0652246
									0.0217415	0.0434831
									0.0217415	0.0869661
									0.0434831	0.0217415
									0.0217415	0.0217415
									0.0217415	0.0217415
									0.152191	0.0434831
									0.0217415	0.0217415
									0.0217415	0.0217415
									0.0217415	0.0217415
									0.0434831	0.0434831
									0.0217415	0.195674
									0.0652246	0.0217415
									0.0869661	0.0434831
									0.0434831	0.0217415
									0.0217415	0.0434831
									0.0434831	0.28264
									0.0869661	0.0217415
									0.108708	0.0869661
									0.543538	0.0217415
									0.0652246	0.0434831
									0.0217415	0.0217415
									0.0434831	0.0652246
									0.0217415	0.0217415
									0.108708	0.0217415
									0.0217415	0.0217415
									0.0217415	0.0217415
									0.0217415	0.0869661
									0.0217415	0.108708
									0.0217415	0.152191
									0.0217415	0.0217415
									0.0652246	0.0217415
									0.0434831	0.0217415
									0.0434831	0.0217415
									0.0434831	0.152191
									0.152191	0.0217415
									0.0652246	0.217415
									0.0434831	0.0217415
									0.0217415	0.0217415
									0.0217415
									0.0434831
									0.0434831
									0.173932
									0.0217415
									0.0869661
									0.0652246
									0.0217415
									0.0217415
									0.0217415
									0.0217415
									0.0434831
									0.0217415
									0.0652246
									0.28264
									0.369606
									0.173932
									0.0217415
									0.0434831
									0.0434831
									0.0434831
									0.0869661
									0.0217415
									0.0217415
									0.0217415
									0.0434831
									0.0869661
									0.173932
									0.0217415
									0.0434831
									0.0217415
									0.0217415
									0.0217415
									0.0217415
									0.0217415
									0.0434831
									0.0217415
									0.0217415
									0.0434831
									0.0217415
									0.0434831
									0.0652246
									0.0652246
									0.0434831
									0.0434831
									0.195674
									0.0217415
									0.0434831
									0.0217415
									0.0217415
									0.0434831
									0.0652246
									0.0434831
									0.0652246
									0.0652246
									0.0434831
									0.0434831
									0.108708
									0.0869661
									0.0869661
									0.0217415
