# Supplementary material for: Molecular dissection of PI3Kβ synergistic activation by receptor tyrosine kinases, GβGγ, and Rho-family GTPases
Source: eLife. 2024 May 7;12:RP88991. doi: 10.7554/eLife.88991 (PMC11076043; doi:10.7554/eLife.88991)
Supplement: Figure 1—figure supplement 2—source data 5. [file elife-88991-fig1-figsupp2-data5.xlsx]

## Sheet: Fig 1 - FS2E
Figure 1 -	Single molecule dwell time distribution
figure supplement 2E									mov1	mov2	mov1/2	mov1	mov2	mov1	mov2
	movie	mov1	mov2	AVE	SD				RAW Dwell time (sec)	RAW Dwell time (sec)	BIN (sec)	freq	freq	1-CDF	1-CDF
10 nM Dy647-PI3KB	alpha	0.9384	0.9465	0.94245	0.00572756				0.173932	0.0434831	0.044	0.449628	0.460446	0.550372	0.539554
200 nM GbGg	T1 (sec)	0.06282	0.0622	0.06251	0.000438406				0.0217415	0.0217415	0.066	0.605815	0.617985	0.394185	0.382015
	T2 (sec)	0.575	0.6298	0.6024	0.0387495				0.0217415	0.0217415	0.088	0.732928	0.737661	0.267072	0.262339
	N	2993	2999	5992					0.0434831	0.0217415	0.11	0.800541	0.804598	0.199459	0.195402
	AVE DT (sec)	0.110281	0.108619	0.10945	0.00117459				0.0434831	1.17404	0.132	0.851251	0.853279	0.148749	0.146721
									0.0869661	0.0434831	0.154	0.873563	0.878972	0.126437	0.121028
only molecules that could be tracked to at least 2 frames (44 ms) were included in analysis									0.0869661	0.0869661	0.176	0.901961	0.908722	0.0980392	0.0912779
AVE DT (sec) = average or mean dwell time for the entire population of molecules									0.239157	0.0869661	0.198	0.914807	0.923597	0.0851927	0.076403
									0.0652246	0.0217415	0.22	0.925625	0.931711	0.0743746	0.0682894
									0.0434831	0.0217415	0.242	0.934415	0.941176	0.0655849	0.0588235
									0.0217415	0.0217415	0.264	0.945909	0.945909	0.0540906	0.0540906
									0.0217415	0.0434831	0.286	0.950642	0.951995	0.0493577	0.0480054
									0.0434831	0.0434831	0.308	0.956051	0.954699	0.0439486	0.0453009
									0.0217415	0.130449	0.33	0.958756	0.95808	0.0412441	0.0419202
									0.0217415	0.0434831	0.352	0.960108	0.96146	0.0398918	0.0385396
									0.0434831	0.173932	0.374	0.963489	0.965517	0.0365112	0.0344828
									0.173932	0.304381	0.396	0.965517	0.968898	0.0344828	0.0311021
									0.0217415	0.0217415	0.418	0.968222	0.972279	0.0317782	0.0277214
									0.0217415	0.0217415	0.44	0.97025	0.972955	0.0297498	0.0270453
									0.0434831	0.0217415	0.462	0.971602	0.973631	0.0283976	0.0263692
									0.0434831	0.0217415	0.484	0.972279	0.974983	0.0277214	0.0250169
									0.108708	0.0217415	0.506	0.972955	0.977011	0.0270453	0.0229885
									0.0217415	0.0217415	0.528	0.973631	0.978364	0.0263692	0.0216362
									0.0434831	0.0217415	0.55	0.975659	0.978364	0.0243408	0.0216362
									0.0434831	0.0434831	0.572	0.976335	0.97904	0.0236646	0.0209601
									0.0652246	0.0434831	0.594	0.977011	0.979716	0.0229885	0.020284
									0.0217415	0.0217415	0.616	0.978364	0.981744	0.0216362	0.0182556
									0.0434831	0.0217415	0.638	0.979716	0.981744	0.020284	0.0182556
									0.0434831	0.0217415	0.66	0.980392	0.982421	0.0196078	0.0175794
									0.0217415	0.130449	0.682	0.981744	0.983097	0.0182556	0.0169033
									0.0217415	0.0434831	0.704	0.982421	0.985125	0.0175794	0.0148749
									0.0217415	0.0217415	0.726	0.982421	0.985801	0.0175794	0.0141988
									0.260898	0.0217415	0.748	0.983097	0.986477	0.0169033	0.0135227
									0.173932	0.239157	0.77	0.983773	0.986477	0.0162272	0.0135227
									0.0434831	0.0217415	0.792	0.985125	0.986477	0.0148749	0.0135227
									0.0652246	0.0434831	0.814	0.985801	0.987153	0.0141988	0.0128465
									0.217415	0.0434831	0.836	0.985801	0.987153	0.0141988	0.0128465
									0.0217415	0.108708	0.858	0.985801	0.987153	0.0141988	0.0128465
									0.0217415	0.0217415	0.88	0.985801	0.987153	0.0141988	0.0128465
									0.0217415	0.0217415	0.902	0.985801	0.987153	0.0141988	0.0128465
									0.0217415	0.0217415	0.924	0.986477	0.987153	0.0135227	0.0128465
									0.0652246	0.0217415	0.946	0.986477	0.98783	0.0135227	0.0121704
									0.0217415	0.0217415	0.968	0.987153	0.98783	0.0128465	0.0121704
									0.108708	0.0217415	0.99	0.98783	0.988506	0.0121704	0.0114943
									0.0869661	0.0434831	1.012	0.988506	0.988506	0.0114943	0.0114943
									0.0217415	0.0652246	1.034	0.989182	0.988506	0.0108181	0.0114943
									0.0869661	0.0217415	1.056	0.989182	0.989182	0.0108181	0.0108181
									0.0217415	0.0434831	1.078	0.989858	0.989858	0.010142	0.010142
									0.0434831	0.0217415	1.1	0.990534	0.989858	0.00946586	0.010142
									0.0434831	0.0434831	1.122	0.99121	0.990534	0.00878972	0.00946586
									0.0217415	0.0217415	1.144	0.99121	0.990534	0.00878972	0.00946586
									0.0434831	0.0217415	1.166	0.991886	0.99121	0.00811359	0.00878972
									0.0652246	0.0652246	1.188	0.991886	0.99121	0.00811359	0.00878972
									0.0434831	0.0217415	1.21	0.991886	0.991886	0.00811359	0.00811359
									0.0217415	0.173932	1.232	0.992563	0.992563	0.00743746	0.00743746
									0.0434831	0.0217415	1.254	0.992563	0.992563	0.00743746	0.00743746
									0.0217415	0.0217415	1.276	0.993915	0.992563	0.00608519	0.00743746
									0.0434831	0.0217415	1.298	0.994591	0.993239	0.00540906	0.00676133
									0.0434831	0.0217415	1.32	0.995267	0.993239	0.00473293	0.00676133
									0.0217415	0.0217415	1.342	0.995943	0.993239	0.0040568	0.00676133
									0.173932	0.0217415	1.364	0.996619	0.993239	0.00338066	0.00676133
									0.0434831	0.0434831	1.386	0.996619	0.993239	0.00338066	0.00676133
									0.0217415	0.0217415	1.408	0.996619	0.993239	0.00338066	0.00676133
									0.0217415	0.0434831	1.43	0.996619	0.993239	0.00338066	0.00676133
									0.217415	0.0434831	1.452	0.997295	0.993239	0.00270453	0.00676133
									0.0217415	0.0434831	1.474	0.997295	0.993239	0.00270453	0.00676133
									0.217415	0.0869661	1.496	0.997295	0.993915	0.00270453	0.00608519
									0.130449	0.0217415	1.518	0.997295	0.993915	0.00270453	0.00608519
									0.0652246	0.0217415	1.54	0.997295	0.993915	0.00270453	0.00608519
									0.0434831	0.0217415	1.562	0.997295	0.993915	0.00270453	0.00608519
									0.0217415	0.0217415	1.584	0.997295	0.993915	0.00270453	0.00608519
									0.0217415	0.0434831	1.606	0.997972	0.993915	0.0020284	0.00608519
									0.0434831	0.0652246	1.628	0.997972	0.993915	0.0020284	0.00608519
									0.0217415	0.0652246	1.65	0.997972	0.993915	0.0020284	0.00608519
									0.0434831	0.0434831	1.672	0.997972	0.993915	0.0020284	0.00608519
									0.0217415	0.0869661	1.694	0.997972	0.993915	0.0020284	0.00608519
									0.0217415	0.0434831	1.716	0.997972	0.995267	0.0020284	0.00473293
									0.0434831	0.173932	1.738	0.997972	0.996619	0.0020284	0.00338066
									0.0217415	0.0434831	1.76	0.997972	0.997295	0.0020284	0.00270453
									0.0217415	0.0434831	1.782	0.997972	0.997295	0.0020284	0.00270453
									0.0217415	0.108708	1.804	0.997972	0.997972	0.0020284	0.0020284
									0.260898	0.0869661	1.826	0.997972	0.997972	0.0020284	0.0020284
									0.0217415	0.0434831	1.848	0.997972	0.997972	0.0020284	0.0020284
									0.130449	0.0217415	1.87	0.997972	0.997972	0.0020284	0.0020284
									0.0217415	0.0652246	1.892	0.997972	0.997972	0.0020284	0.0020284
									0.0434831	0.0869661	1.914	0.997972	0.997972	0.0020284	0.0020284
									0.0434831	0.0434831	1.936	0.997972	0.997972	0.0020284	0.0020284
									0.173932	0.0217415	1.958	0.997972	0.997972	0.0020284	0.0020284
									0.0434831	0.0434831	1.98	0.997972	0.998648	0.0020284	0.00135227
									0.0217415	0.0652246	2.002	0.997972	0.998648	0.0020284	0.00135227
									0.0217415	0.0217415	2.024	0.997972	0.998648	0.0020284	0.00135227
									0.0217415	0.0217415	2.046	0.997972	0.999324	0.0020284	0.000676133
									0.152191	0.0869661	2.068	0.997972	0.999324	0.0020284	0.000676133
									0.0434831	0.0434831	2.09	0.997972	0.999324	0.0020284	0.000676133
									0.108708	0.0434831	2.112	0.997972	0.999324	0.0020284	0.000676133
									0.0652246	0.0217415	2.134	0.997972	0.999324	0.0020284	0.000676133
									0.0217415	0.0217415	2.156	0.999324	0.999324	0.000676133	0.000676133
									0.0217415	0.108708	2.178	0.999324	1	0.000676133	0
									0.0217415	0.0217415	2.2	0.999324	1	0.000676133	0
									0.0217415	0.0217415	2.222	0.999324	1	0.000676133	0
									0.0652246	0.0217415	2.244	0.999324	1	0.000676133	0
									0.0217415	0.108708	2.266	0.999324	1	0.000676133	0
									0.0434831	0.130449	2.288	0.999324	1	0.000676133	0
									0.0434831	0.108708	2.31	0.999324	1	0.000676133	0
									0.0434831	0.0434831	2.332	0.999324	1	0.000676133	0
									0.0434831	0.0217415	2.354	0.999324	1	0.000676133	0
									0.130449	0.0217415	2.376	0.999324	1	0.000676133	0
									0.0434831	0.0217415	2.398	0.999324	1	0.000676133	0
									0.0217415	0.152191	2.42	0.999324	1	0.000676133	0
									0.0217415	0.0217415	2.442	1	1	0	0
									0.0217415	0.0217415
									0.0217415	0.0652246
									0.0217415	0.0217415
									0.0217415	0.0217415
									0.0217415	0.0217415
									0.0217415	0.0217415
									0.0434831	0.0217415
									0.0217415	0.0869661
									0.0434831	0.0217415
									0.0217415	0.0217415
									0.0434831	0.0217415
									0.0217415	0.0217415
									0.0434831	0.0434831
									1.10882	0.0434831
									0.0652246	0.0434831
									0.0217415	0.0434831
									0.0217415	0.0869661
									0.0217415	0.0869661
									0.0217415	0.0217415
									0.0434831	0.0652246
									0.0217415	0.0434831
									0.0434831	0.0434831
									0.0434831	0.0652246
									0.0869661	0.0434831
									0.0434831	0.0217415
									0.0652246	0.0217415
									0.0217415	0.0434831
									0.0217415	0.0217415
									0.0217415	0.0434831
									0.0217415	0.521797
									0.0217415	0.0217415
									0.0217415	0.0217415
									0.195674	0.152191
									0.0652246	2.0437
									0.0217415	0.0217415
									0.0434831	0.173932
									0.0217415	0.391348
									0.0217415	0.0217415
									0.0217415	0.130449
									0.0652246	0.0217415
									0.0434831	0.0869661
									0.0217415	0.0434831
									0.28264	0.0434831
									0.0217415	0.0434831
									0.0434831	0.0217415
									0.0217415	0.0434831
									0.0434831	0.0217415
									0.130449	0.0434831
									0.0434831	0.0217415
									0.0652246	0.108708
									0.0217415	0.0869661
									0.0217415	0.0217415
									0.0217415	0.0652246
									0.0434831	0.0217415
									0.0217415	0.130449
									0.0217415	0.0217415
									0.0217415	0.0217415
									0.0217415	0.0217415
									0.0217415	0.0217415
									0.0869661	0.0217415
									0.0217415	0.108708
									0.0869661	0.0217415
									0.152191	0.0217415
									0.0217415	0.0217415
									0.0217415	0.0217415
									0.0217415	0.0869661
									0.0217415	0.0217415
									0.0434831	0.152191
									0.0217415	0.0217415
									0.0434831	0.0217415
									0.0217415	0.0434831
									0.0217415	0.0869661
									0.0217415	0.0217415
									0.108708	0.108708
									0.195674	0.0434831
									0.0217415	0.0217415
									0.217415	0.0652246
									0.0652246	0.217415
									0.0652246	0.0217415
									0.152191	0.0434831
									0.0217415	0.0217415
									0.0869661	0.0652246
									0.0869661	0.0434831
									0.0434831	0.0217415
									0.0217415	0.0217415
									0.0434831	0.239157
									0.0434831	0.0217415
									0.0434831	0.0217415
									0.0217415	0.0217415
									0.0434831	0.0217415
									0.0217415	0.0217415
									0.0217415	0.0434831
									0.0217415	0.0217415
									0.0217415	0.587021
									0.108708	0.152191
									0.152191	0.0434831
									0.0869661	0.369606
									0.0217415	0.413089
									0.0217415	0.0434831
									0.0217415	0.0217415
									0.0217415	0.0217415
									0.0217415	0.0434831
									0.304381	0.0217415
									0.0217415	0.0217415
									0.0217415	0.0217415
									0.0217415	0.0652246
									0.0217415	0.0434831
									0.0434831	0.108708
									0.326123	0.0217415
									0.0217415	0.0434831
									0.0434831	0.0434831
									0.0869661	0.0652246
									0.0217415	0.0217415
									0.0434831	0.152191
									0.0217415	0.0217415
									0.0217415	0.0217415
									0.0217415	0.0217415
									0.130449	0.0434831
									0.0869661	0.0217415
									0.0217415	0.0434831
									0.108708	0.0217415
									0.0217415	0.130449
									0.130449	0.0217415
									0.0217415	0.108708
									0.0217415	0.0434831
									0.0434831	0.0217415
									0.0652246	0.130449
									0.0869661	0.0434831
									0.0217415	0.0434831
									0.0217415	0.0217415
									0.0434831	0.0217415
									0.0217415	0.195674
									0.0217415	0.0434831
									0.0217415	0.0217415
									0.0217415	0.0652246
									0.0434831	0.0217415
									0.108708	0.0434831
									0.0217415	0.0434831
									0.0217415	0.0217415
									0.0434831	0.0434831
									0.0217415	0.0434831
									0.0434831	0.0434831
									0.173932	0.0652246
									0.0217415	0.0869661
									0.0217415	0.0217415
									0.0434831	0.0217415
									0.0434831	0.0869661
									0.0217415	0.0652246
									0.0217415	0.0217415
									0.0869661	0.0217415
									0.0217415	0.0217415
									0.0434831	0.0652246
									0.0217415	0.0652246
									0.0217415	0.0652246
									0.0217415	0.108708
									0.0217415	0.0217415
									0.0217415	0.0434831
									0.0217415	0.0434831
									0.413089	0.0652246
									0.0217415	0.478314
									0.0217415	0.0434831
									0.0217415	0.0217415
									0.0434831	0.0217415
									0.0652246	0.0217415
									0.0217415	0.0217415
									0.391348	0.0434831
									0.0434831	0.0217415
									0.0434831	0.0217415
									0.108708	0.0217415
									0.0434831	0.217415
									0.0217415	0.0217415
									0.0217415	0.0217415
									0.0217415	0.0217415
									0.0217415	0.0217415
									0.173932	0.0217415
									0.0217415	0.0217415
									0.0652246	0.0217415
									0.0869661	0.0217415
									0.0217415	0.0869661
									0.0434831	0.0652246
									0.0869661	0.0217415
									0.0652246	0.0217415
									0.0217415	0.0434831
									0.0217415	0.0217415
									0.0869661	0.0434831
									0.0434831	0.0434831
									0.0217415	0.0217415
									0.108708	0.0217415
									0.173932	0.0217415
									0.0217415	0.0434831
									0.0652246	0.0217415
									0.0217415	0.0434831
									0.0434831	0.0217415
									0.0434831	0.0217415
									0.0434831	1.76106
									0.152191	0.0217415
									0.0434831	0.0217415
									0.0434831	0.0217415
									0.0217415	0.0652246
									0.0217415	0.0217415
									0.0869661	0.0217415
									0.0217415	0.0217415
									0.0217415	0.152191
									0.0652246	0.152191
									0.0652246	0.0869661
									0.347864	0.0434831
									0.108708	0.0217415
									0.0434831	0.0217415
									0.0652246	0.0217415
									0.0652246	0.0217415
									0.0217415	0.0652246
									0.0434831	0.0217415
									0.0869661	0.0217415
									0.0217415	0.0217415
									0.0652246	0.0652246
									0.0217415	0.0434831
									0.195674	0.0217415
									0.0434831	0.0869661
									0.0434831	0.0217415
									0.239157	0.217415
									0.0217415	0.0217415
									0.0217415	0.108708
									0.0217415	0.0217415
									0.0217415	0.0217415
									0.130449	1.21753
									0.0434831	0.0652246
									0.0434831	0.260898
									0.0217415	0.0217415
									0.0217415	0.0217415
									0.0217415	0.0434831
									0.0217415	0.0217415
									0.0217415	0.0434831
									0.0217415	0.0217415
									0.152191	0.0869661
									0.0217415	0.0869661
									0.0434831	0.0869661
									0.0217415	0.0217415
									0.0434831	0.0217415
									0.0217415	0.0869661
									0.0652246	0.239157
									0.0434831	0.0434831
									0.0217415	0.0434831
									0.0217415	0.28264
									0.108708	0.0434831
									0.0217415	0.0217415
									0.0217415	0.108708
									0.0217415	0.152191
									0.652246	0.0217415
									0.0217415	0.0217415
									0.0217415	0.0434831
									0.0217415	0.108708
									0.0217415	0.0434831
									0.0217415	0.0217415
									0.0217415	0.0217415
									0.0217415	0.0217415
									0.0434831	0.0217415
									0.0434831	0.0217415
									0.0434831	0.0217415
									0.0434831	0.0434831
									0.0217415	0.0217415
									0.0217415	0.0434831
									0.108708	0.0652246
									0.130449	0.0434831
									0.0217415	0.0434831
									0.0217415	0.0217415
									0.0434831	0.0217415
									0.0217415	0.673987
									0.0217415	0.0217415
									0.0217415	0.0434831
									0.0217415	0.0217415
									0.0217415	0.0652246
									0.0217415	0.0217415
									0.0217415	0.0217415
									0.0217415	0.0652246
									0.130449	0.0217415
									0.0217415	0.0217415
									0.0217415	0.0217415
									0.0217415	0.0217415
									0.0217415	0.0217415
									0.0652246	0.108708
									0.108708	0.0869661
									0.0217415	0.108708
									0.0217415	0.0217415
									0.0217415	0.0434831
									0.0217415	0.0217415
									0.0652246	0.0217415
									0.0434831	0.0434831
									0.0217415	0.130449
									0.0434831	0.0434831
									0.0434831	0.0434831
									0.0434831	0.0217415
									0.0217415	0.0217415
									0.0434831	0.0652246
									0.0869661	0.0217415
									0.0434831	0.0217415
									0.0217415	0.173932
									0.0217415	0.0217415
									0.0869661	0.0217415
									0.0217415	0.0652246
									0.0869661	0.0434831
									0.0217415	0.108708
									0.0217415	0.0217415
									0.0217415	0.0217415
									0.0434831	0.0434831
									0.0434831	0.0217415
									0.0217415	0.0217415
									0.0217415	0.0217415
									0.0869661	0.28264
									0.0434831	0.0217415
									0.130449	0.0217415
									0.0217415	0.0869661
									0.0434831	0.0217415
									0.260898	0.0434831
									0.0217415	0.0869661
									0.0217415	0.0434831
									0.0217415	0.0434831
									0.0217415	0.0217415
									0.0217415	0.0434831
									0.0217415	0.0434831
									0.0217415	0.0217415
									2.15241	0.0434831
									0.130449	0.0217415
									0.0434831	0.0217415
									0.0217415	0.0869661
									0.0869661	0.0434831
									0.0434831	0.0869661
									0.0217415	0.0217415
									0.0217415	0.0434831
									0.0869661	0.0217415
									0.0217415	0.0217415
									0.0434831	0.0869661
									0.0652246	0.0217415
									0.0217415	0.0217415
									0.0434831	0.152191
									0.0217415	0.0217415
									0.0217415	0.0434831
									0.0434831	0.0652246
									0.130449	0.0652246
									0.0217415	0.0217415
									0.0217415	0.0217415
									0.0217415	0.0869661
									0.0217415	0.0217415
									0.0217415	0.0652246
									0.0217415	0.0217415
									0.0217415	0.0217415
									0.0869661	0.0217415
									0.0217415	0.0217415
									0.0217415	0.0217415
									0.0434831	0.0652246
									0.0217415	0.0217415
									0.0217415	0.152191
									0.0869661	0.0652246
									0.0434831	0.0217415
									0.0217415	0.0217415
									0.0217415	0.0217415
									0.0217415	0.0217415
									0.0217415	0.0434831
									0.0217415	0.0217415
									0.0217415	0.0434831
									0.0217415	0.0869661
									0.0217415	0.0217415
									0.0217415	0.0217415
									0.0217415	0.0434831
									1.34797	0.0434831
									0.0434831	0.0869661
									0.0434831	0.0434831
									0.108708	0.0217415
									0.0434831	0.0217415
									0.0869661	0.0217415
									0.28264	0.0217415
									0.0217415	0.0434831
									0.0217415	0.0434831
									0.0434831	0.0217415
									0.0217415	0.239157
									0.152191	0.0217415
									0.0217415	0.152191
									0.0434831	0.0434831
									0.0434831	0.0434831
									0.0434831	0.0434831
									0.0434831	0.130449
									0.130449	0.0217415
									0.0217415	0.0217415
									0.0217415	0.0869661
									0.0217415	0.0217415
									0.0434831	0.0217415
									0.0217415	0.0217415
									0.0217415	0.173932
									0.0217415	0.0434831
									0.0217415	0.0434831
									0.0434831	0.0217415
									0.0217415	0.0217415
									0.0869661	0.0217415
									0.0217415	0.0217415
									0.0217415	0.0434831
									0.0217415	0.0217415
									0.0217415	0.0217415
									0.0434831	0.0217415
									0.0217415	0.0217415
									0.0869661	0.0434831
									0.0434831	0.0217415
									0.0217415	0.0217415
									0.0217415	0.0434831
									0.0217415	0.0434831
									0.0434831	0.0217415
									0.173932	0.130449
									0.0652246	0.0434831
									0.0434831	0.0217415
									0.0652246	0.239157
									0.0217415	0.0217415
									0.108708	0.0217415
									0.0217415	0.108708
									0.0652246	1.73932
									0.0434831	0.0217415
									0.0869661	0.0652246
									0.0217415	0.0217415
									0.0869661	0.0434831
									0.0217415	0.108708
									0.0434831	0.0217415
									0.0869661	0.0652246
									0.0869661	0.0652246
									0.0217415	0.152191
									0.108708	0.0217415
									0.0869661	0.0217415
									0.0217415	0.0217415
									0.0217415	0.0217415
									0.0217415	0.0434831
									0.0217415	0.0434831
									0.0217415	0.0217415
									0.0217415	0.0217415
									0.0434831	0.0217415
									0.0434831	0.0217415
									0.0434831	0.0217415
									0.0434831	0.695729
									0.0652246	0.0434831
									0.0217415	0.108708
									0.28264	0.0217415
									1.32623	0.0217415
									0.0869661	0.0434831
									0.0434831	0.0434831
									0.0217415	0.0869661
									0.0434831	0.0434831
									0.0217415	0.0217415
									0.0217415	0.0217415
									0.0217415	0.0217415
									0.0217415	0.0217415
									0.0217415	0.0217415
									0.0434831	0.0217415
									0.0652246	0.0652246
									0.0652246	0.0217415
									0.0217415	0.0652246
									0.0869661	0.0434831
									0.173932	0.0869661
									0.0434831	0.28264
									0.0217415	0.0434831
									0.0217415	0.0217415
									0.0434831	0.0217415
									0.130449	0.0434831
									0.0434831	0.0434831
									0.0869661	0.108708
									0.108708	0.0217415
									0.0217415	0.0217415
									0.0434831	0.0217415
									0.0217415	0.195674
									0.0434831	0.0434831
									0.0434831	0.0434831
									0.0217415	0.0434831
									0.0434831	0.0434831
									0.0217415	0.0434831
									0.0217415	0.0434831
									0.0217415	0.0217415
									0.0217415	0.0434831
									0.0217415	0.0217415
									0.173932	0.0217415
									0.0434831	0.391348
									0.0869661	0.0217415
									0.0434831	0.0869661
									0.0217415	0.0652246
									0.0217415	0.0217415
									0.0217415	0.0217415
									0.0217415	0.0217415
									0.0434831	0.0217415
									0.0217415	0.0217415
									0.0434831	0.0217415
									0.0217415	0.0652246
									0.0217415	0.0217415
									0.0652246	0.0652246
									0.0217415	0.130449
									0.195674	0.0434831
									0.0217415	0.0217415
									0.0652246	0.0652246
									0.0869661	0.347864
									0.0652246	0.130449
									0.0869661	0.56528
									0.0217415	0.0217415
									0.0434831	0.0217415
									0.0869661	0.0217415
									0.0217415	0.0217415
									0.0217415	0.0217415
									0.0217415	0.0217415
									0.0434831	0.0869661
									0.0217415	0.478314
									0.0217415	0.130449
									0.0217415	0.0652246
									0.0217415	0.0217415
									0.0217415	0.0217415
									0.0869661	0.0434831
									0.0652246	0.108708
									0.0434831	0.0217415
									0.0217415	0.0869661
									0.0217415	0.0217415
									0.130449	0.304381
									0.0217415	0.0217415
									0.0217415	0.0217415
									0.0434831	0.0217415
									0.0217415	0.500055
									0.0217415	0.0217415
									0.0217415	0.0434831
									0.0217415	0.0869661
									0.0217415	0.108708
									0.0217415	0.130449
									0.0217415	0.108708
									0.0217415	0.0434831
									0.0652246	0.0217415
									0.108708	0.0217415
									0.0434831	0.0217415
									0.0217415	0.0434831
									0.0652246	0.0217415
									0.0217415	0.0434831
									0.0217415	0.0434831
									0.0217415	0.0434831
									0.0217415	0.0652246
									0.0434831	0.0652246
									0.108708	0.0217415
									0.0217415	0.0434831
									0.0869661	0.130449
									0.0217415	0.0434831
									0.0217415	0.0434831
									0.0434831	0.0434831
									0.0217415	0.0434831
									0.0652246	0.0217415
									0.0434831	0.0217415
									0.0217415	0.0217415
									0.0434831	0.0217415
									0.0217415	0.0217415
									0.0652246	0.0217415
									0.0217415	0.0217415
									0.0217415	0.173932
									0.0434831	0.195674
									0.0217415	0.0434831
									0.0217415	0.108708
									0.0652246	0.130449
									0.0217415	0.0434831
									0.0217415	0.0652246
									0.0217415	0.326123
									0.0652246	0.0217415
									0.0217415	0.0869661
									0.0217415	0.0217415
									0.0217415	0.0434831
									0.0434831	0.0217415
									0.0217415	0.108708
									0.0217415	0.0869661
									0.0434831	0.0217415
									0.0652246	0.0652246
									0.152191	0.0217415
									0.0217415	0.0217415
									0.0652246	0.0869661
									0.0217415	0.0869661
									0.0869661	0.0869661
									0.0869661	0.0217415
									0.0217415	0.0434831
									1.28275	0.0217415
									0.0217415	0.0217415
									0.0217415	0.0434831
									0.0434831	0.0434831
									0.0869661	0.0434831
									0.0217415	0.0217415
									0.173932	0.0217415
									0.0652246	0.0217415
									0.0217415	0.0434831
									0.0217415	0.108708
									0.0217415	0.0434831
									0.0434831	0.0217415
									0.0217415	0.0217415
									0.0652246	0.0217415
									0.0217415	0.0217415
									0.108708	0.0217415
									0.0652246	0.0217415
									0.0652246	0.0217415
									0.0217415	0.0434831
									0.0434831	0.0434831
									0.0217415	0.130449
									0.0217415	0.0869661
									0.0217415	0.108708
									0.0217415	0.0869661
									0.0869661	0.0217415
									0.0869661	0.0217415
									0.0217415	0.0434831
									0.0217415	0.0217415
									0.0652246	0.0217415
									0.108708	0.0217415
									0.0217415	0.0434831
									0.0217415	0.0217415
									0.0217415	0.108708
									0.0652246	0.0217415
									0.0434831	0.0434831
									0.0434831	0.0217415
									0.0217415	0.0217415
									0.0217415	0.0217415
									0.0217415	0.0217415
									0.0217415	0.0217415
									0.0217415	0.0217415
									0.0434831	0.0434831
									0.0652246	0.0434831
									0.0434831	0.0217415
									0.0217415	0.0217415
									0.108708	0.0217415
									0.0217415	0.0434831
									0.0217415	0.0217415
									0.0217415	0.0217415
									0.0217415	0.108708
									0.0434831	0.173932
									0.173932	0.0217415
									0.195674	0.0869661
									0.0217415	0.0217415
									0.0217415	0.0217415
									0.0217415	0.0434831
									0.0869661	0.0217415
									0.0434831	0.0434831
									0.0217415	0.130449
									0.0217415	0.0217415
									0.543538	0.0217415
									0.0217415	0.326123
									0.0217415	0.0217415
									0.0869661	0.0217415
									0.0434831	0.0434831
									0.0217415	0.0217415
									0.0217415	0.0217415
									0.0434831	0.0217415
									0.173932	0.0217415
									0.0217415	0.0217415
									0.130449	0.0217415
									0.0869661	0.0217415
									0.0434831	0.0217415
									0.0217415	0.0869661
									0.0217415	0.0217415
									0.0652246	0.0434831
									0.0217415	0.0217415
									0.0217415	0.0434831
									0.0434831	0.0217415
									0.0217415	0.0217415
									0.0217415	0.0217415
									0.0217415	0.130449
									0.0217415	0.0434831
									0.0652246	0.0434831
									0.130449	0.0652246
									0.0217415	0.0217415
									0.0217415	0.0217415
									0.760954	0.0434831
									0.0217415	0.0217415
									0.0434831	0.0217415
									0.0217415	0.0217415
									0.0869661	0.0217415
									0.0434831	0.0217415
									0.0217415	0.0434831
									0.0217415	0.0217415
									0.0434831	0.0434831
									0.260898	0.0217415
									0.0652246	0.0217415
									0.0434831	0.0217415
									0.0217415	0.0217415
									0.0652246	0.0217415
									0.0217415	0.0652246
									0.0217415	0.0652246
									0.0217415	0.0652246
									0.0434831	0.195674
									0.130449	0.0434831
									0.0217415	0.0652246
									0.0869661	0.0652246
									0.0217415	0.0434831
									0.0217415	0.0652246
									0.108708	0.130449
									0.0217415	0.0217415
									0.0217415	0.0434831
									0.0217415	0.0217415
									0.0217415	0.0217415
									0.0217415	0.0217415
									0.0434831	0.0434831
									0.173932	0.0217415
									0.0434831	0.0869661
									0.0217415	0.0434831
									0.0217415	0.0217415
									0.0217415	0.0217415
									0.0434831	0.0217415
									0.0652246	0.0217415
									0.0217415	0.0652246
									0.0652246	0.0217415
									0.0434831	0.0434831
									0.0434831	0.0217415
									0.0217415	0.0434831
									0.0217415	0.0217415
									0.0217415	0.0217415
									0.0434831	0.0217415
									0.0217415	0.0434831
									0.130449	0.0434831
									0.0869661	0.195674
									0.0434831	0.0217415
									0.0434831	0.0217415
									0.0869661	0.217415
									0.0217415	0.0217415
									0.0652246	0.0217415
									0.108708	0.0217415
									0.0217415	0.0217415
									2.43505	0.0217415
									0.0217415	0.0217415
									0.0434831	0.0434831
									0.108708	0.0217415
									0.0217415	0.347864
									0.0217415	0.0217415
									0.0217415	0.0652246
									0.0217415	0.0217415
									0.0217415	0.0217415
									0.0217415	0.0217415
									0.0217415	0.130449
									0.108708	0.0217415
									0.0217415	0.0652246
									0.0217415	0.0217415
									0.0652246	0.0869661
									0.0652246	0.0869661
									0.0217415	0.0217415
									0.0869661	0.0217415
									1.17404	0.0217415
									0.0217415	0.0217415
									0.0217415	0.0434831
									0.0652246	0.0652246
									0.108708	0.0434831
									0.0217415	0.0217415
									0.0434831	0.0217415
									0.0217415	0.0434831
									0.0217415	0.0217415
									0.0217415	0.0217415
									0.0652246	0.0434831
									0.0652246	0.0217415
									0.0217415	0.0869661
									0.0434831	0.0217415
									0.0217415	0.0217415
									0.0217415	0.0217415
									0.130449	0.0434831
									0.0217415	0.0217415
									0.0217415	0.108708
									0.0217415	0.369606
									0.0217415	0.0217415
									0.0434831	0.173932
									0.0869661	0.0434831
									0.0652246	0.0217415
									0.0217415	0.0217415
									0.0217415	0.0217415
									0.0217415	0.0217415
									0.0434831	0.0217415
									0.0434831	0.0652246
									0.108708	0.0217415
									0.0217415	1.23927
									0.0434831	0.0217415
									0.0217415	0.152191
									0.130449	0.0217415
									0.0652246	0.0869661
									0.0434831	0.0217415
									0.0652246	0.0217415
									0.0434831	0.0652246
									0.0217415	0.0217415
									0.0217415	0.0869661
									0.0217415	0.0217415
									0.0217415	0.0217415
									0.0434831	0.0652246
									0.0869661	0.0652246
									0.0652246	0.0217415
									0.0217415	0.0217415
									0.0217415	0.0434831
									0.0434831	0.0652246
									0.0217415	0.0434831
									0.0434831	0.0652246
									0.0217415	0.0652246
									0.0217415	0.0652246
									0.0217415	0.0434831
									0.0652246	0.0434831
									0.0217415	0.0217415
									0.0652246	0.0217415
									0.0217415	0.0217415
									0.0434831	0.108708
									0.0217415	0.0217415
									0.173932	0.0217415
									0.0434831	0.0217415
									0.0652246	0.0652246
									0.108708	0.0869661
									0.0217415	0.0217415
									0.108708	0.0217415
									0.0434831	0.0217415
									0.0217415	0.0652246
									0.0217415	0.0652246
									0.0217415	0.0434831
									0.0869661	0.0217415
									0.0217415	0.0434831
									0.0217415	0.0652246
									0.108708	0.173932
									0.0217415	0.0869661
									0.0217415	0.0217415
									0.0434831	0.0217415
									0.0434831	0.0217415
									0.0652246	0.0217415
									0.0217415	0.130449
									0.108708	0.0869661
									0.0217415	0.217415
									0.0217415	0.0217415
									0.0217415	0.0217415
									0.0217415	0.0217415
									0.0652246	0.0217415
									0.0652246	0.0217415
									0.0434831	0.0217415
									0.0217415	0.0217415
									0.0869661	0.0217415
									0.0434831	0.0434831
									0.0652246	0.0217415
									0.0217415	0.0217415
									0.108708	0.130449
									0.0217415	0.0217415
									0.0434831	0.0217415
									0.0434831	0.0434831
									0.0869661	0.0652246
									0.0217415	0.0434831
									0.0217415	0.0434831
									0.0217415	0.0217415
									0.0217415	0.0434831
									0.0434831	0.0217415
									0.0434831	0.0434831
									0.0217415	0.0217415
									0.0217415	0.0217415
									0.0434831	0.0217415
									0.0217415	0.173932
									0.0869661	0.0434831
									0.0652246	0.0217415
									0.0869661	0.0217415
									0.0869661	0.0434831
									0.0217415	0.0217415
									0.130449	0.0217415
									0.0217415	0.0652246
									0.0217415	0.0217415
									0.0652246	0.0217415
									0.0217415	0.0217415
									0.0217415	0.0217415
									0.0434831	0.391348
									0.0217415	0.0217415
									0.0652246	0.0434831
									0.0217415	0.173932
									0.0434831	0.0434831
									0.0652246	0.0652246
									0.0869661	0.0869661
									0.0869661	0.130449
									0.0217415	0.0217415
									0.108708	0.0217415
									0.0434831	0.0434831
									0.0434831	0.0434831
									0.0217415	0.0217415
									0.0652246	0.391348
									0.0217415	0.0652246
									0.0434831	0.0217415
									0.0217415	0.0434831
									0.0434831	0.0434831
									0.0217415	0.0217415
									0.0217415	0.0217415
									0.0434831	0.0217415
									0.0217415	0.0869661
									0.0434831	0.0217415
									0.0434831	0.0434831
									0.0217415	0.0217415
									0.0217415	0.0434831
									0.0217415	0.108708
									0.0652246	0.0434831
									0.217415	0.0217415
									0.217415	0.0434831
									0.0434831	0.0217415
									0.0434831	0.0217415
									0.239157	0.0434831
									0.173932	0.0434831
									0.0217415	0.0217415
									0.0434831	0.0217415
									0.0434831	0.0434831
									0.0434831	0.0217415
									0.0217415	0.0434831
									0.0434831	0.0217415
									0.0217415	0.0217415
									0.0217415	0.0217415
									0.0217415	0.0217415
									0.0869661	0.0652246
									0.0434831	0.0434831
									0.0217415	0.0217415
									0.130449	0.108708
									0.0217415	0.0434831
									0.0434831	0.0434831
									0.0217415	0.0217415
									0.0217415	0.347864
									0.0434831	0.956627
									0.0434831	0.0217415
									0.0217415	0.0217415
									0.0217415	0.0217415
									0.0217415	0.0652246
									0.0434831	0.0217415
									0.0217415	0.0434831
									0.260898	0.0652246
									0.0217415	0.0217415
									0.0217415	0.0217415
									0.0217415	0.0217415
									0.108708	0.130449
									1.13056	0.0434831
									0.0217415	0.108708
									0.0217415	0.0217415
									0.0217415	0.0217415
									0.0217415	0.0217415
									0.152191	0.152191
									0.0217415	0.0217415
									0.0434831	0.0217415
									0.0217415	0.0217415
									0.0869661	0.0217415
									0.0217415	0.0217415
									0.0217415	0.0869661
									0.130449	0.0217415
									0.0217415	0.0217415
									0.0434831	0.0434831
									0.0217415	0.0652246
									0.0869661	0.0217415
									0.0217415	0.0217415
									0.0217415	0.0434831
									0.0217415	0.0434831
									0.0434831	0.0434831
									0.0217415	0.0217415
									0.0652246	0.0217415
									0.0217415	0.0217415
									0.0217415	0.0434831
									0.0217415	0.0652246
									0.0217415	0.0652246
									0.0217415	0.0217415
									0.0217415	0.0434831
									0.0217415	0.239157
									0.0869661	0.0217415
									0.0869661	0.0217415
									0.260898	0.0217415
									0.0434831	0.0217415
									0.0434831	0.0652246
									0.0217415	0.0434831
									0.0217415	0.0434831
									0.152191	0.0217415
									0.0217415	0.0434831
									0.0434831	0.0434831
									0.0217415	0.0434831
									0.0434831	0.0217415
									0.0217415	0.173932
									0.0434831	0.0434831
									0.0217415	0.0434831
									0.108708	0.173932
									0.152191	0.0217415
									0.173932	0.0217415
									0.0217415	0.0217415
									0.0217415	0.108708
									0.0217415	0.0652246
									0.0217415	0.0652246
									0.0652246	0.0217415
									0.0434831	0.173932
									0.0869661	0.0869661
									0.0434831	0.0434831
									0.0652246	0.0869661
									0.0869661	0.0217415
									0.0652246	0.108708
									0.0434831	0.0434831
									0.0652246	0.0217415
									0.0434831	0.108708
									0.0869661	0.173932
									0.0217415	2.17415
									0.130449	0.173932
									0.0434831	0.0217415
									0.0434831	0.0217415
									0.0217415	0.0217415
									0.260898	0.0217415
									0.0652246	0.0217415
									0.0434831	0.0434831
									0.0434831	0.130449
									0.0869661	0.0217415
									0.0217415	0.0652246
									0.108708	0.0217415
									0.0869661	0.0217415
									0.260898	0.195674
									0.56528	0.0217415
									0.130449	0.0434831
									0.239157	0.0217415
									0.0434831	0.0217415
									0.0434831	0.0434831
									0.0217415	0.0217415
									0.0652246	0.0217415
									0.0217415	0.0434831
									0.0869661	0.0217415
									0.0217415	0.0217415
									0.0434831	0.0217415
									0.0869661	0.0217415
									0.0217415	0.0217415
									0.0652246	0.0217415
									0.130449	0.0652246
									0.130449	0.108708
									0.0217415	0.0434831
									0.0217415	0.0652246
									0.0217415	0.0434831
									0.0217415	0.0434831
									0.0217415	0.0434831
									0.0217415	0.0217415
									0.108708	0.0217415
									0.326123	0.0434831
									0.130449	0.0434831
									0.0434831	0.0217415
									0.0217415	0.0434831
									0.0434831	0.0217415
									0.0869661	0.0652246
									0.0217415	0.0652246
									0.0217415	0.108708
									0.0652246	0.0434831
									0.0217415	0.130449
									0.0217415	0.521797
									1.02185	0.0217415
									0.108708	0.0217415
									0.0434831	0.0217415
									0.0217415	0.0217415
									0.108708	0.0217415
									0.0434831	0.0434831
									0.0217415	0.0434831
									0.217415	0.0869661
									0.478314	0.0652246
									0.0217415	0.0217415
									0.0434831	0.0652246
									0.0434831	0.0434831
									0.0217415	0.0434831
									0.0217415	0.0217415
									0.0217415	0.0217415
									0.0869661	0.0217415
									0.304381	0.0217415
									0.0217415	0.0217415
									0.152191	0.0434831
									0.0434831	0.0652246
									0.0217415	0.130449
									0.0217415	0.0217415
									0.0434831	0.0217415
									0.0434831	0.0217415
									0.152191	0.173932
									0.0217415	0.0434831
									0.152191	0.0217415
									0.0217415	0.0434831
									0.260898	0.0869661
									0.0217415	0.0217415
									0.0217415	0.0652246
									0.0869661	0.0652246
									0.0652246	0.0217415
									0.0434831	0.0217415
									0.0217415	0.0217415
									0.0869661	0.0217415
									0.0217415	0.0217415
									0.0434831	0.0217415
									0.217415	0.0217415
									0.0434831	0.0217415
									0.0434831	0.0217415
									0.0217415	0.0217415
									0.0217415	0.0434831
									1.04359	0.0217415
									0.0652246	0.0217415
									0.152191	0.0434831
									0.0434831	0.0434831
									0.0217415	0.0217415
									0.108708	0.0217415
									0.0652246	0.0217415
									0.130449	0.0434831
									0.0217415	0.0217415
									0.0217415	0.0217415
									0.108708	0.0869661
									0.0217415	0.0434831
									0.0217415	0.0434831
									0.0217415	0.0434831
									0.0217415	0.108708
									0.0217415	0.130449
									0.0869661	0.0217415
									0.0217415	0.0217415
									0.0652246	0.0217415
									0.0217415	0.0217415
									0.0217415	0.173932
									0.0217415	0.173932
									0.130449	0.195674
									0.0434831	0.0217415
									0.0217415	0.0434831
									0.0217415	0.152191
									0.0217415	0.0652246
									0.413089	0.0434831
									0.0217415	0.0217415
									0.0217415	0.0217415
									0.0434831	0.0217415
									0.152191	0.0217415
									0.0217415	0.108708
									0.0217415	0.0434831
									0.0652246	0.0434831
									0.0869661	0.0434831
									0.0217415	0.0217415
									0.0217415	0.0217415
									0.0217415	0.0434831
									0.152191	0.0434831
									0.0434831	0.0434831
									0.0217415	0.0869661
									0.0869661	0.0434831
									0.0869661	0.0217415
									0.0217415	0.0217415
									0.0434831	0.0217415
									0.0217415	0.0217415
									0.0217415	0.28264
									0.0434831	0.0217415
									0.804437	0.0434831
									0.0217415	0.0652246
									0.0434831	0.0434831
									0.0652246	0.0217415
									0.130449	0.0217415
									0.0217415	0.173932
									0.0217415	0.0217415
									0.0217415	0.0217415
									0.0217415	0.0217415
									0.0217415	0.0217415
									0.0217415	0.608763
									0.0217415	0.0652246
									0.0217415	0.173932
									0.0869661	0.0217415
									1.00011	0.0652246
									0.0217415	0.0652246
									0.0217415	0.0217415
									0.434831	0.0217415
									0.0652246	0.0217415
									0.0217415	0.0869661
									0.0434831	0.0434831
									0.0652246	0.0217415
									0.0217415	0.0434831
									0.0217415	0.0217415
									0.0434831	0.0217415
									0.0217415	0.0434831
									0.108708	0.0217415
									0.0217415	0.0217415
									0.0434831	0.0217415
									0.0217415	0.0217415
									0.0217415	0.0217415
									0.0434831	0.0217415
									0.0217415	0.0217415
									0.0434831	0.0217415
									0.0217415	0.0217415
									0.130449	0.239157
									0.0434831	0.0217415
									0.0217415	0.0217415
									0.500055	0.0652246
									0.0217415	0.0652246
									0.0217415	0.0217415
									0.0217415	0.0652246
									0.0217415	0.0869661
									0.0217415	0.0434831
									0.0652246	0.0434831
									0.0434831	0.0434831
									0.0217415	0.0434831
									0.0217415	0.0217415
									0.0217415	0.0217415
									0.0217415	0.0217415
									0.0652246	0.0217415
									0.304381	0.0434831
									0.0652246	0.0217415
									0.0217415	0.0217415
									0.0217415	0.0434831
									0.0869661	0.0434831
									1.36972	0.0434831
									0.0217415	0.0217415
									0.0434831	0.0434831
									0.0217415	0.0434831
									0.0217415	0.0434831
									0.630504	0.0434831
									0.0434831	0.0217415
									0.0217415	0.0434831
									0.0217415	0.0217415
									0.0434831	0.0217415
									0.0217415	0.0434831
									0.0217415	0.0434831
									0.0217415	0.0217415
									0.152191	0.0217415
									0.0434831	0.0217415
									0.0434831	0.0217415
									0.130449	0.0217415
									0.0217415	0.0217415
									0.0217415	0.0217415
									0.0217415	0.0217415
									0.0869661	0.0434831
									0.0217415	0.0217415
									0.130449	0.0217415
									0.0217415	0.0217415
									0.0652246	0.0217415
									0.0217415	0.0434831
									0.0217415	0.0217415
									0.130449	0.108708
									0.108708	0.0217415
									0.0217415	0.0217415
									0.0217415	0.130449
									0.0217415	0.0217415
									0.0434831	0.0434831
									0.108708	0.0217415
									0.0869661	0.0217415
									0.0434831	0.0217415
									0.0217415	0.0217415
									0.0217415	0.0217415
									0.0434831	0.0869661
									0.0217415	0.0217415
									0.0434831	0.0217415
									0.0434831	0.0434831
									0.0217415	0.0434831
									0.0217415	0.0217415
									0.0217415	0.0217415
									0.195674	0.0217415
									0.0217415	0.0217415
									0.0434831	0.0217415
									0.130449	0.0434831
									0.195674	0.0869661
									0.0652246	0.0434831
									0.0217415	0.108708
									0.0217415	0.0217415
									0.0434831	0.0217415
									0.0217415	0.0217415
									0.326123	0.0217415
									0.0217415	0.173932
									0.0434831	0.0434831
									0.0434831	0.434831
									0.0217415	0.0869661
									0.130449	0.0217415
									0.173932	0.0217415
									0.0652246	0.0434831
									0.0217415	0.0434831
									0.0434831	0.0217415
									0.0217415	0.0217415
									0.0217415	0.0217415
									0.0217415	0.0869661
									0.0434831	0.0652246
									0.0217415	0.0217415
									1.45668	0.0217415
									0.0652246	0.0217415
									0.0217415	0.108708
									0.0652246	0.0217415
									0.0434831	0.0217415
									0.0869661	0.0217415
									0.0217415	0.0217415
									0.0652246	0.0869661
									0.0652246	0.130449
									0.0217415	0.0652246
									0.0217415	0.0217415
									0.108708	0.0217415
									0.0434831	0.0434831
									0.0434831	1.00011
									0.0434831	0.152191
									0.0434831	0.0217415
									0.0652246	0.130449
									0.0217415	0.0217415
									0.0434831	0.0434831
									0.0869661	0.0217415
									0.0434831	0.0217415
									0.0217415	0.0652246
									0.0217415	0.0434831
									0.0434831	0.0217415
									0.0652246	0.0217415
									0.0434831	0.0217415
									0.0217415	0.0434831
									0.0217415	0.0217415
									0.195674	0.0217415
									0.0434831	0.0869661
									0.108708	0.0217415
									0.0652246	0.0217415
									0.0217415	0.0217415
									0.0217415	0.0217415
									0.0217415	0.0217415
									0.0217415	0.0217415
									0.0217415	0.0217415
									0.0434831	0.0434831
									0.0217415	0.0652246
									0.0217415	0.0217415
									0.130449	0.0217415
									0.0217415	0.0217415
									0.0217415	0.0217415
									0.0217415	0.0217415
									0.0434831	0.0434831
									0.0217415	0.0434831
									0.0217415	0.0434831
									0.239157	0.0217415
									0.0217415	0.0217415
									0.0434831	0.0434831
									0.0217415	1.73932
									0.0869661	0.0652246
									0.0217415	0.0217415
									0.0217415	0.0217415
									0.0217415	0.108708
									0.0217415	0.195674
									0.0652246	0.0217415
									0.0434831	0.0434831
									0.0217415	0.0869661
									0.0434831	0.0652246
									0.0217415	0.0434831
									0.0217415	0.0434831
									0.0217415	0.0217415
									0.0217415	0.0217415
									0.0434831	0.0217415
									0.0217415	0.0217415
									0.0434831	0.0217415
									0.0217415	0.0217415
									0.0434831	0.0217415
									0.0434831	0.0434831
									0.0434831	0.108708
									0.0652246	0.0217415
									0.0217415	0.0217415
									0.0869661	0.0434831
									0.0434831	0.195674
									0.0217415	0.695729
									0.0217415	0.0869661
									0.0652246	0.0434831
									0.0217415	0.0217415
									0.0652246	0.0217415
									0.0434831	0.0434831
									0.0217415	0.260898
									0.0217415	0.0217415
									0.0217415	0.0217415
									0.0869661	0.0652246
									0.0217415	0.0217415
									0.0217415	0.0217415
									0.0217415	0.0217415
									0.0434831	0.0217415
									0.0217415	0.0217415
									0.0217415	0.0217415
									0.0217415	0.0217415
									0.0217415	0.0217415
									0.0434831	0.173932
									0.978369	0.0217415
									0.0434831	0.0217415
									0.0217415	0.0217415
									0.0217415	0.0217415
									0.0217415	0.130449
									0.0434831	0.0652246
									0.0434831	0.391348
									0.0217415	0.0434831
									0.543538	0.0217415
									0.0217415	0.0869661
									0.0217415	0.0652246
									0.0217415	0.0434831
									0.0434831	0.0217415
									0.0434831	0.0217415
									0.0434831	0.0434831
									0.0217415	0.0217415
									0.0217415	0.0217415
									0.0217415	1.71758
									0.0217415	0.0652246
									0.0434831	0.0217415
									0.0434831	0.0434831
									0.0217415	0.0217415
									0.0217415	0.0434831
									0.108708	0.0434831
									0.0434831	0.0217415
									0.0434831	0.217415
									0.108708	0.0434831
									0.0217415	0.0434831
									0.0652246	0.0434831
									0.0434831	0.0217415
									0.0217415	0.0434831
									0.0217415	0.0434831
									0.0217415	0.0869661
									0.0869661	0.108708
									0.0217415	0.0217415
									0.0434831	0.0434831
									0.0434831	0.0217415
									0.195674	0.108708
									0.0652246	0.0217415
									0.0217415	0.0434831
									0.0869661	0.0217415
									0.108708	0.0217415
									0.0217415	0.0434831
									0.0217415	0.0434831
									0.0434831	0.152191
									0.0434831	0.0434831
									0.0434831	0.456572
									0.0434831	0.0217415
									0.0217415	0.0217415
									0.0217415	0.152191
									0.0217415	0.0217415
									0.0434831	0.0869661
									0.0434831	0.0217415
									0.0217415	0.0652246
									0.0217415	0.0217415
									0.0434831	0.0217415
									0.0217415	0.0434831
									0.0217415	0.0217415
									0.0217415	0.0217415
									0.130449	0.130449
									0.0434831	0.152191
									0.0217415	0.0217415
									0.0217415	0.0217415
									0.0217415	0.0217415
									0.0217415	0.0217415
									0.0217415	0.108708
									0.0217415	0.0217415
									0.0217415	0.0217415
									0.0869661	0.0217415
									0.673987	0.0217415
									0.0652246	0.413089
									0.0434831	0.0652246
									0.0217415	0.0652246
									0.0434831	0.0217415
									0.0217415	0.0217415
									0.0652246	0.0217415
									0.0434831	0.0434831
									0.0434831	0.0217415
									0.0434831	0.0217415
									0.0217415	0.0217415
									0.0217415	1.71758
									0.108708	0.0434831
									0.0217415	0.130449
									0.0434831	0.0434831
									0.0434831	0.0217415
									0.0217415	0.0217415
									0.0217415	0.108708
									0.0869661	0.108708
									0.0652246	0.0217415
									0.0434831	0.0217415
									0.0217415	0.0217415
									0.0217415	0.0217415
									0.0217415	0.0217415
									0.0652246	0.0869661
									0.0217415	0.0217415
									0.0217415	0.0217415
									0.0434831	0.173932
									0.0434831	0.173932
									0.0217415	0.0217415
									0.0217415	0.0217415
									0.0217415	0.0217415
									0.0217415	0.0217415
									0.0217415	0.0434831
									0.0434831	0.0217415
									0.0217415	0.0652246
									0.0434831	0.0217415
									0.0217415	0.108708
									0.0434831	0.0869661
									0.0217415	0.0217415
									0.0217415	0.0217415
									0.0217415	0.0217415
									0.108708	0.0217415
									0.0434831	0.0434831
									0.0434831	0.0217415
									0.0217415	0.0217415
									0.0217415	0.0434831
									0.347864	0.0434831
									0.0434831	0.0434831
									0.0652246	0.173932
									0.0217415	0.0217415
									0.0217415	0.173932
									0.0217415	0.195674
									0.0434831	0.0217415
									0.0434831	0.0217415
									0.0217415	0.108708
									0.0217415	0.0434831
									0.173932	0.0217415
									0.0217415	0.0217415
									0.0217415	1.08708
									0.0217415	0.0869661
									0.0217415	0.0217415
									0.0217415	0.0217415
									0.260898	0.0217415
									0.0217415	0.0434831
									0.0869661	0.0217415
									0.0217415	0.0217415
									0.0217415	0.0217415
									0.0434831	0.0434831
									0.0217415	0.0652246
									0.0217415	0.0434831
									0.0217415	0.0217415
									0.0217415	0.0217415
									0.108708	0.0434831
									0.0217415	0.0217415
									0.0217415	0.0217415
									0.0652246	0.0869661
									0.0869661	0.0217415
									0.0434831	0.0434831
									0.0217415	0.0434831
									0.130449	0.0434831
									0.0217415	0.0434831
									0.0217415	0.108708
									0.0217415	0.0434831
									0.0217415	0.0869661
									0.108708	0.0434831
									0.130449	0.173932
									0.152191	0.0869661
									0.0217415	0.0217415
									0.0652246	0.0434831
									0.0217415	0.0217415
									0.0217415	0.0869661
									0.0217415	0.173932
									0.0434831	0.0869661
									0.0217415	0.0434831
									0.0217415	0.0434831
									0.0869661	0.152191
									0.0217415	0.0434831
									0.0434831	0.0217415
									0.0217415	0.0217415
									0.173932	0.0217415
									0.0217415	0.195674
									0.0434831	0.0217415
									0.0217415	0.0217415
									0.0217415	0.0434831
									0.0217415	0.0434831
									0.0217415	0.0869661
									0.0217415	0.0652246
									0.239157	0.0217415
									0.0434831	0.0217415
									0.0217415	0.0217415
									0.0434831	0.130449
									0.0217415	0.173932
									0.0217415	0.0869661
									0.0217415	0.173932
									0.173932	0.0434831
									0.0434831	0.0217415
									0.0217415	0.0652246
									0.0217415	0.108708
									0.0652246	0.0869661
									0.217415	1.97848
									0.152191	0.0217415
									0.0217415	0.0217415
									0.0434831	0.0217415
									0.0217415	0.0869661
									0.0217415	0.0217415
									0.0652246	0.0434831
									0.0434831	0.0217415
									0.0434831	0.0217415
									0.0217415	0.239157
									0.0217415	0.0217415
									0.0652246	0.0217415
									0.0217415	0.0434831
									0.0434831	0.0434831
									0.0217415	0.0217415
									0.0869661	0.0217415
									0.0434831	0.0434831
									0.0652246	0.0869661
									0.0434831	0.0217415
									0.0217415	0.0434831
									0.0217415	0.0217415
									0.0434831	0.28264
									0.0652246	0.0434831
									0.195674	0.0217415
									0.0434831	0.0434831
									0.0217415	0.0217415
									0.0217415	0.0652246
									0.0869661	0.0434831
									0.0652246	0.0217415
									0.0217415	0.0217415
									0.0217415	0.500055
									0.0652246	0.152191
									0.0217415	0.0434831
									0.0217415	0.0434831
									0.260898	0.195674
									0.0652246	0.0217415
									0.0217415	0.0217415
									0.0217415	0.0652246
									0.108708	0.0869661
									0.108708	0.0434831
									0.0217415	0.130449
									0.0217415	0.0652246
									0.0434831	0.0434831
									0.304381	0.0217415
									0.0217415	0.0217415
									0.0217415	0.0434831
									0.0434831	0.0869661
									0.0217415	0.0869661
									0.0217415	0.0217415
									0.0217415	0.0217415
									0.0217415	0.0217415
									0.0434831	0.0217415
									0.0217415	0.0217415
									0.0217415	0.0869661
									0.0434831	0.0217415
									0.0217415	0.0217415
									0.0217415	0.0217415
									0.0217415	0.0434831
									0.0217415	0.0217415
									0.0652246	0.0217415
									0.0434831	0.0217415
									0.0217415	0.0869661
									0.0217415	0.0434831
									0.0217415	0.0217415
									0.0434831	0.0869661
									0.0434831	0.0869661
									0.0434831	0.152191
									0.0217415	0.0217415
									0.0217415	0.0434831
									0.0217415	0.0434831
									0.0217415	0.0434831
									0.0217415	0.0434831
									0.0869661	0.0434831
									0.0217415	0.152191
									0.0434831	0.0652246
									0.434831	0.0869661
									0.0217415	0.0434831
									0.0652246	0.0217415
									0.260898	0.0217415
									0.0217415	0.0434831
									0.0217415	0.0652246
									0.0217415	0.0434831
									0.0434831	0.0217415
									0.0434831	0.0434831
									0.0434831	0.217415
									0.0217415	0.0434831
									0.0869661	0.0434831
									0.0434831	0.0434831
									0.0217415	0.0434831
									0.0217415	0.0434831
									0.739212	0.0434831
									0.260898	0.0434831
									0.0217415	0.0217415
									0.0434831	0.0217415
									0.0217415	0.0217415
									0.0434831	0.0869661
									0.0434831	0.108708
									0.0652246	0.0652246
									0.0869661	0.0434831
									0.0217415	0.0434831
									0.0652246	0.0217415
									0.0434831	0.130449
									0.173932	0.0217415
									0.0217415	0.0217415
									0.130449	0.0217415
									0.0217415	0.0217415
									0.0434831	0.0217415
									0.0217415	0.217415
									0.0217415	0.0869661
									0.0217415	0.0217415
									0.0217415	0.0652246
									0.0217415	0.0217415
									0.0217415	0.108708
									0.0869661	0.0434831
									0.0217415	0.108708
									0.0217415	0.108708
									0.0434831	0.108708
									0.173932	0.0217415
									0.0217415	0.0217415
									0.0434831	0.0217415
									0.0652246	0.0434831
									0.0217415	0.0217415
									0.0217415	0.0217415
									0.0217415	0.0434831
									0.0434831	0.0434831
									0.0217415	0.0217415
									0.0652246	0.0434831
									0.304381	0.0217415
									0.0217415	0.0434831
									0.0217415	0.0434831
									0.0217415	0.0217415
									0.108708	0.0217415
									0.0217415	0.0652246
									0.0217415	0.0217415
									0.0434831	0.0217415
									0.0217415	0.0217415
									0.0217415	0.239157
									0.0217415	0.0217415
									0.0217415	0.130449
									0.0652246	0.0652246
									0.0217415	0.0217415
									0.0217415	0.0217415
									0.0652246	0.0869661
									0.304381	0.0217415
									0.0434831	0.0217415
									0.108708	0.0217415
									0.0217415	0.0217415
									0.0434831	0.0652246
									0.0434831	0.0434831
									0.0217415	0.0217415
									0.0434831	0.0217415
									0.0217415	0.0217415
									0.0434831	0.0217415
									0.0217415	0.0434831
									0.0217415	0.0652246
									0.0217415	0.0217415
									0.0217415	0.0869661
									0.0434831	0.0434831
									0.0217415	0.0434831
									0.0652246	0.0217415
									0.0434831	0.0434831
									0.0434831	0.0217415
									0.0652246	0.0217415
									0.0434831	0.108708
									0.0869661	0.0217415
									0.0869661	0.608763
									0.0217415	0.0434831
									0.0434831	0.0217415
									0.0217415	0.0434831
									0.108708	0.0217415
									0.0217415	0.0652246
									0.0217415	0.28264
									0.0217415	0.0434831
									0.130449	0.0217415
									0.0217415	0.0434831
									0.0217415	0.0869661
									0.0434831	0.0434831
									0.0652246	0.0434831
									0.239157	0.0217415
									0.0869661	0.0217415
									0.0434831	0.0434831
									0.0217415	0.0217415
									0.0217415	0.0434831
									0.0217415	0.0434831
									0.0217415	0.0217415
									0.0217415	0.0217415
									0.608763	0.326123
									0.0217415	0.0434831
									0.152191	0.0434831
									0.0434831	0.0217415
									2.15241	0.0434831
									0.0217415	0.0217415
									0.0217415	0.0217415
									0.0217415	0.130449
									0.0434831	0.0434831
									0.0434831	0.0434831
									0.0217415	0.0217415
									0.0217415	0.0217415
									0.0217415	0.0217415
									0.0217415	0.0217415
									0.0869661	0.0217415
									0.0217415	0.0869661
									0.0217415	0.0434831
									0.673987	0.0217415
									0.0652246	0.108708
									0.0217415	0.0217415
									0.0217415	0.0434831
									0.0217415	0.0217415
									0.0434831	0.0434831
									0.0434831	0.0217415
									0.0217415	0.0217415
									0.0217415	0.0869661
									0.0434831	0.0217415
									0.782695	0.0869661
									0.0652246	0.0434831
									0.0217415	0.0434831
									0.28264	0.0434831
									0.0217415	0.0217415
									0.0434831	0.0217415
									0.0217415	0.0217415
									0.0217415	0.0217415
									0.0652246	0.195674
									0.0217415	0.0217415
									0.0217415	0.0869661
									0.0217415	0.0217415
									0.260898	0.0217415
									0.0434831	0.0652246
									0.0434831	0.0217415
									0.0434831	0.0217415
									0.0217415	0.0217415
									0.0652246	0.0869661
									0.0217415	0.0217415
									0.0434831	0.152191
									0.0217415	0.0652246
									0.152191	0.413089
									0.0434831	0.0434831
									0.0217415	0.0217415
									0.0434831	0.0434831
									0.0869661	0.0434831
									0.0217415	0.0217415
									0.0434831	0.0434831
									0.0217415	0.0434831
									0.0217415	0.0217415
									0.0217415	0.0434831
									0.0217415	0.0217415
									0.0434831	0.0217415
									0.0434831	0.0869661
									0.0434831	0.0434831
									0.0217415	0.0434831
									0.0217415	0.0434831
									0.0217415	0.0217415
									0.0217415	0.0217415
									0.0434831	0.152191
									0.0217415	0.0434831
									0.0434831	0.130449
									0.0217415	0.0217415
									0.0434831	0.0217415
									0.0434831	0.130449
									0.0217415	0.0434831
									0.0434831	0.0217415
									0.0217415	0.0217415
									0.0434831	0.130449
									0.0434831	0.0434831
									0.0434831	0.0217415
									0.0869661	0.152191
									0.0217415	0.0217415
									0.173932	0.195674
									0.130449	0.0217415
									0.108708	0.0434831
									0.0217415	0.152191
									0.0652246	1.30449
									0.195674	0.0869661
									0.108708	0.0217415
									0.0434831	0.108708
									0.0434831	0.0217415
									0.0217415	0.413089
									0.0217415	0.0217415
									0.0434831	0.0217415
									0.152191	0.0217415
									0.0869661	0.0652246
									0.0434831	0.0217415
									0.0434831	0.0217415
									0.630504	0.0217415
									0.0217415	0.130449
									0.0434831	0.0217415
									0.0217415	0.0217415
									0.0217415	0.0217415
									0.0434831	0.0217415
									0.173932	0.0652246
									0.0217415	0.195674
									0.0217415	0.0217415
									0.0217415	0.0217415
									0.0869661	0.0217415
									0.0217415	0.0869661
									0.130449	0.195674
									0.0652246	0.0869661
									0.0217415	0.152191
									0.0217415	0.0434831
									0.0217415	0.0434831
									0.0217415	0.0217415
									0.0434831	0.0869661
									0.0217415	0.0217415
									0.108708	0.0217415
									0.0434831	0.0434831
									0.0217415	0.0217415
									0.0217415	0.0217415
									0.0434831	0.0217415
									0.0434831	0.152191
									0.0217415	0.0434831
									0.0217415	0.0217415
									0.0217415	0.0434831
									0.0217415	0.0652246
									0.0434831	0.0434831
									0.0434831	0.0217415
									0.0434831	0.0434831
									0.0217415	0.0434831
									0.0217415	0.0217415
									0.0869661	0.0869661
									0.0434831	0.0217415
									0.0434831	0.0217415
									0.0217415	0.0217415
									0.0434831	0.0434831
									0.782695	0.0217415
									0.0434831	0.0217415
									0.108708	0.0434831
									0.0217415	0.0652246
									0.0217415	0.0217415
									0.0434831	0.0434831
									0.0217415	0.695729
									0.0217415	0.0217415
									0.0217415	1.13056
									0.0217415	0.0869661
									0.0217415	0.0217415
									0.0217415	0.0652246
									0.0217415	0.130449
									0.0434831	0.0869661
									0.0217415	0.217415
									0.0434831	0.0217415
									0.0217415	0.0217415
									0.0652246	0.0217415
									0.0652246	0.0434831
									0.0652246	0.0869661
									0.0434831	0.0217415
									0.0217415	0.0652246
									0.0434831	0.0217415
									0.0217415	0.0217415
									0.0217415	0.0217415
									0.130449	0.0217415
									0.0217415	0.0217415
									0.195674	0.0217415
									0.0217415	0.0869661
									0.0434831	0.0217415
									0.0869661	0.0869661
									1.30449	0.0217415
									0.108708	0.0869661
									0.0434831	0.0217415
									0.0217415	0.0434831
									0.0217415	0.28264
									0.0217415	0.0434831
									0.0217415	0.0434831
									0.0217415	0.0434831
									0.0217415	0.0217415
									0.0652246	0.0217415
									0.0869661	0.0434831
[truncated: 1,002 more rows]
