# Supplementary material for: Molecular dissection of PI3Kβ synergistic activation by receptor tyrosine kinases, GβGγ, and Rho-family GTPases
Source: eLife. 2024 May 7;12:RP88991. doi: 10.7554/eLife.88991 (PMC11076043; doi:10.7554/eLife.88991)
Supplement: Figure 1—figure supplement 2—source data 6. [file elife-88991-fig1-figsupp2-data6.xlsx]

## Sheet: Fig 1 - FS2F
Figure 1 -	Single molecule dwell time distribution
figure supplement 2F								mov1	mov2	mov1/2	mov1	mov2	mov1	mov2
	movie	mov1	mov2	AVE	SD			RAW Dwell time (sec)	RAW Dwell time (sec)	BIN (sec)	freq	freq	1-CDF	1-CDF
10 nM Dy647-PI3KB (KR->DD)	alpha	0.8774	0.8589	0.86815	0.0130815			0.0217415	0.0217415	0.044	0.482014	0.427918	0.517986	0.572082
200 nM GbGg	T1 (sec)	0.05737	0.06208	0.059725	0.00333047			0.0217415	0.108708	0.066	0.606715	0.590389	0.393285	0.409611
	T2 (sec)	0.5279	0.4591	0.4935	0.0486489			0.0652246	0.0217415	0.088	0.71223	0.693364	0.28777	0.306636
	N	1056	1101	2157				0.0217415	0.0869661	0.11	0.77458	0.745995	0.22542	0.254005
	AVE DT (sec)	0.130762	0.134678	0.13272	0.00276908			0.0217415	0.260898	0.132	0.817746	0.789474	0.182254	0.210526
								0.0217415	0.0217415	0.154	0.839329	0.832952	0.160671	0.167048
only molecules that could be tracked to at least 2 frames (44 ms) were included in analysis								0.0217415	0.108708	0.176	0.865707	0.853547	0.134293	0.146453
AVE DT (sec) = average or mean dwell time for the entire population of molecules								0.0434831	0.0217415	0.198	0.894484	0.8627	0.105516	0.1373
								0.0434831	0.0217415	0.22	0.908873	0.874142	0.0911271	0.125858
								0.0217415	0.0217415	0.242	0.911271	0.883295	0.088729	0.116705
								0.0217415	0.0652246	0.264	0.918465	0.901602	0.0815348	0.0983982
								0.0217415	0.0217415	0.286	0.925659	0.91762	0.0743405	0.0823799
								0.0869661	0.173932	0.308	0.928058	0.926773	0.0719424	0.0732265
								0.0217415	0.0434831	0.33	0.930456	0.933638	0.0695444	0.0663616
								0.0652246	0.0434831	0.352	0.930456	0.935927	0.0695444	0.0640732
								1.47842	0.0217415	0.374	0.932854	0.938215	0.0671463	0.0617849
								0.0217415	0.239157	0.396	0.935252	0.940503	0.0647482	0.0594966
								0.0217415	0.173932	0.418	0.935252	0.942792	0.0647482	0.0572082
								0.0217415	0.0217415	0.44	0.944844	0.947368	0.0551559	0.0526316
								0.0434831	0.0217415	0.462	0.944844	0.949657	0.0551559	0.0503432
								0.0434831	0.0217415	0.484	0.954436	0.951945	0.0455635	0.0480549
								0.0217415	0.0217415	0.506	0.956835	0.956522	0.0431655	0.0434783
								0.0217415	0.0217415	0.528	0.956835	0.95881	0.0431655	0.0411899
								0.0217415	0.0217415	0.55	0.956835	0.961098	0.0431655	0.0389016
								0.0217415	0.0434831	0.572	0.956835	0.961098	0.0431655	0.0389016
								0.0217415	0.0434831	0.594	0.956835	0.961098	0.0431655	0.0389016
								0.0869661	0.130449	0.616	0.959233	0.963387	0.0407674	0.0366133
								0.0217415	0.0652246	0.638	0.966427	0.965675	0.0335731	0.0343249
								0.0217415	0.0217415	0.66	0.966427	0.970252	0.0335731	0.0297483
								0.0217415	0.0869661	0.682	0.973621	0.970252	0.0263789	0.0297483
								0.0217415	0.0217415	0.704	0.973621	0.97254	0.0263789	0.02746
								0.0217415	0.0217415	0.726	0.973621	0.97254	0.0263789	0.02746
								0.0217415	0.0652246	0.748	0.973621	0.97254	0.0263789	0.02746
								0.0434831	0.0217415	0.77	0.976019	0.974828	0.0239808	0.0251716
								0.108708	0.0217415	0.792	0.978417	0.974828	0.0215827	0.0251716
								0.0434831	0.0217415	0.814	0.978417	0.974828	0.0215827	0.0251716
								0.0434831	0.0217415	0.836	0.978417	0.977117	0.0215827	0.0228833
								0.0217415	0.0217415	0.858	0.978417	0.977117	0.0215827	0.0228833
								0.0217415	0.0217415	0.88	0.978417	0.979405	0.0215827	0.020595
								0.630504	0.0434831	0.902	0.978417	0.979405	0.0215827	0.020595
								0.0652246	0.0434831	0.924	0.978417	0.981693	0.0215827	0.0183066
								0.0869661	0.0434831	0.946	0.980815	0.981693	0.0191847	0.0183066
								0.130449	0.108708	0.968	0.980815	0.981693	0.0191847	0.0183066
								0.0434831	0.0217415	0.99	0.980815	0.981693	0.0191847	0.0183066
								0.0217415	0.0217415	1.012	0.980815	0.981693	0.0191847	0.0183066
								0.630504	0.0217415	1.034	0.980815	0.98627	0.0191847	0.01373
								0.0217415	0.0217415	1.056	0.980815	0.98627	0.0191847	0.01373
								0.0217415	0.0217415	1.078	0.980815	0.98627	0.0191847	0.01373
								0.0217415	0.0434831	1.1	0.980815	0.98627	0.0191847	0.01373
								0.108708	0.130449	1.122	0.980815	0.98627	0.0191847	0.01373
								0.0217415	0.0217415	1.144	0.980815	0.98627	0.0191847	0.01373
								0.195674	0.0217415	1.166	0.980815	0.98627	0.0191847	0.01373
								0.0869661	0.0434831	1.188	0.980815	0.98627	0.0191847	0.01373
								0.195674	0.0217415	1.21	0.980815	0.98627	0.0191847	0.01373
								0.0217415	0.0217415	1.232	0.985612	0.988558	0.0143885	0.0114416
								0.0217415	0.0217415	1.254	0.985612	0.990847	0.0143885	0.00915332
								0.0217415	0.0434831	1.276	0.985612	0.990847	0.0143885	0.00915332
								0.0434831	0.0434831	1.298	0.985612	0.990847	0.0143885	0.00915332
								0.0217415	0.0217415	1.32	0.985612	0.990847	0.0143885	0.00915332
								0.0217415	0.0217415	1.342	0.98801	0.990847	0.0119904	0.00915332
								0.152191	0.0217415	1.364	0.98801	0.990847	0.0119904	0.00915332
								0.0434831	0.0434831	1.386	0.98801	0.990847	0.0119904	0.00915332
								0.0869661	0.0217415	1.408	0.98801	0.990847	0.0119904	0.00915332
								0.0434831	0.0217415	1.43	0.98801	0.993135	0.0119904	0.00686499
								0.108708	0.0434831	1.452	0.990408	0.993135	0.00959233	0.00686499
								0.0434831	0.0217415	1.474	0.992806	0.993135	0.00719424	0.00686499
								0.0217415	0.0217415	1.496	0.992806	0.993135	0.00719424	0.00686499
								0.0869661	0.0869661	1.518	0.995204	0.993135	0.00479616	0.00686499
								0.0217415	0.0217415	1.54	0.997602	0.993135	0.00239808	0.00686499
								0.0869661	0.0217415	1.562	0.997602	0.993135	0.00239808	0.00686499
								0.0434831	0.0434831	1.584	0.997602	0.993135	0.00239808	0.00686499
								0.260898	0.0217415	1.606	0.997602	0.993135	0.00239808	0.00686499
								0.0217415	0.0217415	1.628	0.997602	0.995423	0.00239808	0.00457666
								0.0434831	0.0217415	1.65	0.997602	0.995423	0.00239808	0.00457666
								0.0869661	0.0217415	1.672	0.997602	0.997712	0.00239808	0.00228833
								0.260898	0.0217415	1.694	0.997602	0.997712	0.00239808	0.00228833
								2.19589	0.0217415	1.716	0.997602	0.997712	0.00239808	0.00228833
								0.0217415	0.0217415	1.738	0.997602	0.997712	0.00239808	0.00228833
								0.0217415	0.0217415	1.76	0.997602	0.997712	0.00239808	0.00228833
								0.0217415	0.0217415	1.782	0.997602	0.997712	0.00239808	0.00228833
								0.0217415	0.0217415	1.804	0.997602	0.997712	0.00239808	0.00228833
								0.0217415	0.0652246	1.826	0.997602	0.997712	0.00239808	0.00228833
								0.0652246	0.0217415	1.848	0.997602	0.997712	0.00239808	0.00228833
								0.0434831	0.0217415	1.87	0.997602	0.997712	0.00239808	0.00228833
								0.0217415	0.0434831	1.892	0.997602	0.997712	0.00239808	0.00228833
								0.0217415	0.0217415	1.914	0.997602	0.997712	0.00239808	0.00228833
								0.108708	0.0434831	1.936	0.997602	0.997712	0.00239808	0.00228833
								0.0434831	0.0217415	1.958	0.997602	0.997712	0.00239808	0.00228833
								0.0217415	0.608763	1.98	0.997602	0.997712	0.00239808	0.00228833
								0.0217415	0.0217415	2.002	0.997602	0.997712	0.00239808	0.00228833
								0.0217415	0.0217415	2.024	0.997602	0.997712	0.00239808	0.00228833
								0.0217415	0.0217415	2.046	0.997602	0.997712	0.00239808	0.00228833
								0.956627	0.0217415	2.068	0.997602	0.997712	0.00239808	0.00228833
								0.0217415	0.0217415	2.09	0.997602	0.997712	0.00239808	0.00228833
								0.0217415	0.0217415	2.112	0.997602	0.997712	0.00239808	0.00228833
								0.0869661	0.0217415	2.134	0.997602	0.997712	0.00239808	0.00228833
								0.0434831	0.0434831	2.156	0.997602	0.997712	0.00239808	0.00228833
								0.0217415	0.0217415	2.178	0.997602	0.997712	0.00239808	0.00228833
								0.0217415	0.0217415	2.2	1	0.997712	0	0.00228833
								0.0652246	0.0434831	2.222	1	0.997712	0	0.00228833
								0.0217415	0.326123	2.244	1	0.997712	0	0.00228833
								0.0217415	0.0652246	2.266	1	0.997712	0	0.00228833
								0.28264	0.0217415	2.288	1	0.997712	0	0.00228833
								0.0217415	0.0434831	2.31	1	1	0	0
								0.0217415	0.0217415
								0.0434831	0.0217415
								0.108708	0.0434831
								0.0217415	0.0217415
								0.0217415	0.0217415
								0.0217415	0.130449
								0.0217415	0.0217415
								0.195674	0.152191
								0.434831	0.152191
								0.0217415	0.456572
								0.0652246	0.0434831
								0.0869661	0.0652246
								0.0217415	0.0217415
								0.0217415	0.0434831
								0.0217415	0.0217415
								0.0217415	0.0217415
								0.0652246	0.0434831
								0.0217415	0.0217415
								0.0217415	0.0434831
								0.0434831	0.0217415
								0.0434831	0.130449
								0.152191	0.0217415
								0.0217415	0.260898
								0.0217415	0.28264
								0.239157	0.0217415
								0.0217415	0.0434831
								0.0217415	0.0217415
								0.0652246	0.217415
								0.0217415	0.0217415
								0.195674	0.0217415
								0.0217415	0.0217415
								0.0217415	0.0217415
								0.0217415	0.0217415
								0.0217415	0.0217415
								0.0217415	0.0217415
								0.0434831	0.0217415
								0.0217415	1.04359
								0.0652246	0.0434831
								0.0434831	0.0217415
								0.0217415	0.0217415
								0.195674	0.0217415
								0.0217415	0.0217415
								0.0217415	0.0217415
								0.0217415	0.0217415
								0.0217415	0.0434831
								0.0217415	0.0217415
								0.28264	0.0217415
								0.108708	0.0652246
								0.0434831	0.0217415
								0.0217415	0.0217415
								0.0217415	0.0217415
								0.0217415	0.130449
								0.195674	0.0217415
								0.0434831	0.239157
								0.0434831	0.521797
								0.0217415	0.152191
								0.0217415	0.0217415
								0.0434831	0.0217415
								0.0434831	0.0217415
								0.152191	0.0217415
								0.0217415	0.0434831
								0.0652246	0.0217415
								0.0217415	0.0434831
								0.0217415	0.108708
								0.130449	0.0217415
								0.0217415	0.0217415
								0.0217415	0.0217415
								0.217415	1.63061
								0.0217415	0.0217415
								0.173932	0.0217415
								0.0217415	0.108708
								0.0217415	0.0217415
								0.0434831	0.0217415
								0.0217415	0.0217415
								0.0869661	0.260898
								0.0434831	0.0217415
								0.0217415	0.0217415
								0.0434831	0.0217415
								0.0217415	0.0434831
								0.0217415	0.0217415
								0.0217415	0.0217415
								0.0217415	0.0217415
								0.478314	0.0869661
								0.0217415	0.108708
								0.0652246	0.130449
								0.0217415	0.0217415
								0.0217415	0.0217415
								0.0434831	0.0217415
								0.0652246	0.695729
								0.0434831	0.0217415
								0.0217415	0.0652246
								0.152191	0.0217415
								0.0217415	0.0217415
								0.0217415	0.0652246
								0.0217415	0.0217415
								0.0217415	0.0217415
								0.108708	0.0217415
								0.0869661	0.0217415
								0.0217415	0.869661
								0.0434831	0.0217415
								0.0217415	0.0652246
								0.0217415	0.0434831
								0.0434831	0.217415
								0.108708	0.0652246
								0.108708	0.0217415
								0.0217415	0.0434831
								0.0434831	0.0217415
								0.0217415	0.391348
								0.0217415	0.0217415
								0.0217415	0.0217415
								0.0434831	0.0217415
								0.0217415	0.0217415
								0.0434831	0.152191
								0.0217415	0.0434831
								0.0217415	0.0217415
								0.0217415	0.0434831
								0.0217415	0.0434831
								0.0217415	0.0434831
								0.0217415	0.0434831
								0.0434831	0.0217415
								0.0217415	0.0217415
								0.173932	0.0217415
								0.0217415	0.173932
								0.130449	0.0217415
								0.0217415	0.0217415
								0.0217415	0.0869661
								0.0217415	0.0652246
								0.0869661	0.130449
								0.0217415	0.0217415
								0.0217415	0.0217415
								0.0217415	0.0217415
								0.0434831	1.04359
								0.0434831	0.0434831
								0.195674	0.0217415
								0.0434831	0.0434831
								0.0217415	0.0217415
								0.0217415	0.0217415
								0.0217415	0.0652246
								0.0652246	0.0434831
								0.260898	0.0217415
								0.0217415	0.0434831
								0.0434831	0.0434831
								1.45668	0.0869661
								0.108708	0.0217415
								0.0217415	0.0869661
								0.173932	0.0217415
								0.0217415	0.0217415
								0.0869661	0.0217415
								0.0217415	0.0869661
								0.0217415	0.0217415
								0.0217415	0.130449
								0.0217415	0.0217415
								0.0217415	0.0434831
								0.0217415	0.0217415
								0.0217415	0.0217415
								0.0217415	0.478314
								0.0217415	0.260898
								0.0217415	0.0217415
								0.0217415	0.0217415
								0.782695	0.0217415
								0.0217415	0.0434831
								0.478314	0.0217415
								0.0217415	0.0652246
								0.0217415	0.0434831
								0.0217415	0.0217415
								0.0217415	0.0217415
								0.0217415	0.0434831
								0.0434831	0.0434831
								0.0217415	0.0217415
								0.0217415	0.0434831
								0.0217415	0.0217415
								0.0217415	0.0434831
								0.0217415	0.0434831
								0.0652246	0.0434831
								0.0217415	0.0217415
								0.0217415	0.0434831
								0.0217415	0.0434831
								0.0434831	0.0434831
								0.0217415	0.0217415
								0.0217415	0.152191
								0.0217415	0.0217415
								0.0434831	0.0217415
								0.0434831	0.217415
								0.391348	0.0217415
								0.0217415	0.0434831
								0.0217415	0.934886
								0.0217415	0.0434831
								0.0217415	0.0434831
								0.0217415	0.0434831
								0.0652246	0.0434831
								0.0217415	0.0217415
								0.0434831	0.0217415
								0.0434831	0.0434831
								0.0217415	0.0217415
								0.0217415	0.173932
								0.0434831	0.0217415
								0.0869661	0.0434831
								0.0217415	0.347864
								0.0434831	0.0217415
								0.0217415	0.0434831
								0.0217415	0.0217415
								0.0869661	0.0217415
								0.0217415	0.0217415
								0.108708	0.0217415
								0.0217415	0.0434831
								0.0217415	0.0217415
								0.0217415	0.0434831
								0.0869661	0.152191
								0.0217415	0.0217415
								0.0217415	0.0217415
								0.0217415	0.326123
								0.0434831	0.0217415
								0.0217415	0.0434831
								0.0434831	0.0434831
								0.0217415	0.0217415
								0.130449	0.28264
								0.0217415	0.0217415
								0.0217415	0.0217415
								0.0434831	0.0217415
								0.0217415	0.0217415
								0.195674	0.0217415
								0.0217415	0.0217415
								0.108708	0.0217415
								0.0217415	0.108708
								0.0217415	0.0434831
								0.152191	0.0434831
								0.0434831	0.0434831
								0.0434831	0.413089
								0.0652246	0.0217415
								0.0217415	0.0217415
								0.0217415	0.0869661
								0.0217415	0.108708
								0.0217415	0.0217415
								0.0434831	0.0434831
								0.0217415	0.0652246
								0.0217415	0.0217415
								0.0217415	0.0217415
								0.0217415	0.0217415
								0.0217415	0.0217415
								0.0869661	0.0217415
								0.0217415	0.0217415
								0.0217415	0.0652246
								0.0217415	0.0217415
								0.0217415	0.0217415
								0.0217415	0.0217415
								0.0217415	0.0652246
								0.0434831	0.0217415
								0.0217415	0.0217415
								0.0434831	0.0869661
								0.0869661	0.0217415
								0.0434831	0.0217415
								0.0434831	0.0217415
								0.673987	0.0217415
								0.0434831	0.652246
								0.0217415	0.152191
								0.0217415	0.0217415
								0.0217415	0.0434831
								0.326123	0.0217415
								0.0434831	0.0217415
								0.0217415	0.0217415
								0.0217415	0.0217415
								0.0434831	0.0217415
								0.0217415	0.0217415
								0.0869661	0.0217415
								0.0217415	0.0217415
								0.0434831	0.0652246
								0.0217415	0.0217415
								0.130449	0.0652246
								0.0869661	0.0869661
								0.0434831	0.0217415
								0.0217415	0.0217415
								0.0217415	0.0217415
								0.0217415	0.0217415
								0.0434831	0.0217415
								0.0652246	0.0652246
								0.0217415	0.0217415
								0.0217415	0.0217415
								0.0217415	0.0652246
								0.217415	0.0217415
								0.0217415	0.0434831
								0.0217415	0.0217415
								0.0217415	0.0217415
								0.0217415	0.0217415
								0.0217415	0.0434831
								0.0434831	0.0217415
								0.0434831	0.0434831
								0.0217415	0.0652246
								0.0434831	0.0434831
								0.0217415	0.0434831
								0.0217415	0.0217415
								0.0217415	0.0434831
								0.0217415	0.0217415
								0.673987	0.0217415
								0.0217415	0.0434831
								0.0652246	0.0434831
								0.0217415	0.0217415
								0.0217415	0.0217415
								0.217415	0.500055
								0.0434831	0.0217415
								0.0217415	0.0434831
								0.0217415	0.0217415
								0.0652246	0.0217415
								0.630504	0.0217415
								0.0217415	0.0217415
								0.217415	0.0217415
								0.0217415	0.0217415
								0.0869661	0.0217415
								0.0434831	0.0217415
								0.0217415	0.0652246
								0.0217415	0.0217415
								0.0217415	0.0217415
								0.0217415	0.0434831
								0.217415	0.0217415
								0.0217415	0.0434831
								0.0652246	0.0434831
								0.0434831	0.0217415
								0.0434831	0.0217415
								0.0217415	0.0434831
								0.0217415	0.0869661
								0.0217415	0.0217415
								0.0217415	0.0217415
								0.0652246	0.0869661
								0.0217415	0.0217415
								0.0434831	0.0217415
								0.0217415	0.0217415
								0.0217415	0.0217415
								0.0217415	0.543538
								0.0217415	0.0869661
								0.173932	0.0217415
								0.0217415	0.0434831
								0.0869661	0.0217415
								0.0217415	0.0217415
								0.0434831	0.0217415
								0.0217415	0.0217415
								0.0217415	0.0217415
								0.0652246	0.0217415
								0.0217415	0.0652246
								0.0434831	0.0217415
								0.0217415	0.0217415
								0.673987	0.130449
								0.0217415	0.0217415
								0.0217415	0.0652246
								0.0217415	0.0217415
								0.0434831	0.0434831
								0.0217415	0.0217415
								0.0217415	0.0217415
								0.0217415	0.0217415
								0.0217415	0.0217415
								0.0217415	0.260898
								0.0434831	0.152191
								0.0217415	0.0217415
								0.0217415	0.0217415
								0.0434831	0.0434831
								0.0869661	0.0434831
								0.0217415	0.0217415
								0.0217415	0.0217415
								0.0217415	0.0217415
								0.0217415	0.0869661
								0.0217415	0.0434831
								0.0217415	0.0217415
								0.0434831	0.0434831
								0.0217415	0.0434831
								0.0217415	0.0434831
								0.108708	0.0217415
								0.0217415	0.0217415
								0.0217415	0.0434831
								0.0434831	0.130449
								0.0217415	0.0434831
								0.0217415	0.0217415
								0.0217415	0.0434831
								0.108708	0.108708
								0.0652246	0.0217415
								0.0434831	0.0217415
								0.108708	0.0217415
								0.0217415	0.0217415
								0.0217415	0.0217415
								0.0217415	0.0217415
								0.0217415	0.0434831
								0.0217415	0.0217415
								0.0434831	0.0869661
								0.0217415	0.0217415
								0.0217415	0.0217415
								0.0434831	0.0217415
								0.0217415	0.434831
								0.0217415	0.0217415
								0.0434831	0.0869661
								0.0217415	0.0652246
								0.0217415	0.0217415
								0.0217415	0.0217415
								0.195674	0.0652246
								0.0217415	0.0652246
								0.0217415	0.0217415
								0.0217415	0.0652246
								0.0217415	0.0217415
								0.0217415	0.0869661
								0.0869661	0.0652246
								0.0434831	0.0652246
								0.0434831	0.0434831
								0.0217415	0.130449
								0.0217415	0.0217415
								0.0217415	0.0217415
								0.0217415	0.108708
								0.0217415	0.0217415
								0.0217415	0.0434831
								0.0434831	0.0217415
								0.0217415	0.0217415
								0.0217415	0.0217415
								0.0217415	0.0652246
								0.0217415	0.0869661
								0.0217415	0.0217415
								0.0217415	0.0217415
								0.0217415	0.0217415
								0.0217415	0.0217415
								0.0434831	0.0434831
								0.0217415	0.0217415
								0.0217415	0.0217415
								0.0217415	0.0217415
								0.0217415	0.0217415
								0.0217415	0.0217415
								0.0217415	0.0217415
								0.0217415	0.434831
								0.0434831	0.0434831
								0.0217415	0.108708
								0.0217415	0.0869661
								0.0217415	0.173932
								0.0217415	0.0217415
								0.0652246	0.0217415
								0.0434831	0.0217415
								0.0434831	0.0434831
								0.0217415	0.0217415
								0.0217415	0.0434831
								0.0217415	0.0217415
								0.108708	0.152191
								0.0217415	0.0652246
								0.0217415	0.152191
								0.0434831	0.0869661
								0.0869661	0.0434831
								0.500055	0.0652246
								0.0217415	0.0217415
								0.0434831	0.0434831
								0.0217415	0.0434831
								0.0217415	0.0217415
								0.0217415	0.0217415
								0.0217415	0.239157
								0.0434831	0.0217415
								0.0217415	0.0434831
								0.0217415	0.0217415
								0.0652246	0.0217415
								0.0217415	0.0652246
								0.0217415	0.0217415
								0.0217415	0.0869661
								0.0217415	0.0217415
								0.0217415	0.0217415
								0.0217415	0.0434831
								0.0217415	0.0434831
								0.0652246	0.28264
								0.0217415	0.0434831
								0.130449	0.0217415
								0.0434831	0.0652246
								0.0217415	0.0217415
								0.0217415	0.28264
								0.0217415	0.0217415
								0.0217415	0.0217415
								0.0217415	0.0217415
								0.0217415	0.0434831
								0.0217415	0.108708
								0.0217415	0.0434831
								0.0652246	0.0217415
								0.0217415	0.0217415
								0.0434831	0.0652246
								0.0217415	0.0217415
								0.0217415	0.0869661
								0.152191	0.0652246
								0.0869661	0.0217415
								0.0217415	0.173932
								0.0217415	0.0217415
								0.0652246	0.0434831
								0.0434831	0.108708
								0.0217415	0.0217415
								0.0217415	0.0217415
								0.0217415	0.0652246
								0.0217415	0.0217415
								0.0434831	0.652246
								0.0434831	0.0869661
								0.0434831	0.0217415
								0.0217415	0.130449
								0.0434831	0.0217415
								0.0217415	0.0217415
								0.0217415	0.0217415
								0.0217415	0.260898
								0.0217415	0.0217415
								0.0217415	0.0217415
								0.0217415	0.0217415
								0.0217415	0.0217415
								0.130449	0.108708
								0.0217415	0.0217415
								0.0217415	0.0217415
								0.0217415	0.0869661
								0.0217415	0.0217415
								0.0217415	0.0217415
								0.0217415	0.0217415
								0.0217415	0.260898
								0.0434831	0.0217415
								0.0434831	0.0217415
								0.0434831	0.0652246
								0.0217415	0.0869661
								0.0217415	0.0434831
								0.0217415	0.0652246
								0.0217415	0.0217415
								0.0217415	0.0652246
								0.0217415	0.0217415
								0.0652246	0.0217415
								0.0434831	0.108708
								0.0217415	0.0652246
								0.0434831	0.0217415
								0.28264	0.0217415
								0.0217415	0.0217415
								0.434831	0.0434831
								0.0217415	0.0217415
								0.0869661	0.195674
								0.0434831	0.0217415
								0.108708	0.0652246
								0.0217415	0.0434831
								0.0217415	0.0217415
								0.0869661	0.0434831
								0.0217415	0.0217415
								0.0217415	0.0217415
								0.0217415	0.0217415
								0.0217415	0.0434831
								0.130449	0.0217415
								0.0434831	0.0217415
								0.0434831	0.0217415
								0.173932	0.0434831
								0.608763	0.0217415
								0.0217415	0.0217415
								0.108708	0.0217415
								0.0217415	0.0434831
								0.0869661	0.0217415
								0.0434831	0.0434831
								0.0869661	0.0217415
								0.0434831	0.0217415
								0.0652246	0.0217415
								0.0434831	0.0217415
								0.0217415	0.0217415
								0.0217415	0.0217415
								0.0217415	0.0217415
								0.0434831	0.0652246
								0.0217415	1.23927
								0.0217415	0.0217415
								0.0434831	0.152191
								0.0434831	0.0217415
								0.0434831	0.0217415
								0.0217415	0.0217415
								0.0434831	0.0217415
								0.0652246	0.0217415
								0.0434831	0.0434831
								0.0217415	0.0217415
								0.0217415	0.0217415
								0.0434831	0.0217415
								0.0217415	0.0217415
								0.0434831	0.0217415
								0.0434831	0.0217415
								0.0434831	0.0217415
								0.0434831	0.0217415
								0.0217415	0.0217415
								0.0217415	0.0217415
								0.0434831	0.0217415
								0.130449	0.152191
								0.0434831	0.0217415
								0.0217415	0.0217415
								0.0217415	0.0434831
								0.0434831	0.0217415
								0.0869661	0.0217415
								0.0217415	0.173932
								0.0217415	0.0217415
								0.0217415	0.0217415
								0.0217415	0.0434831
								0.130449	0.0652246
								0.0217415	0.0217415
								0.0434831	0.239157
								0.0434831	0.0217415
								0.0434831	0.130449
								0.0217415	0.0652246
								0.0217415	0.0434831
								0.0217415	0.0217415
								0.0217415	0.0217415
								0.0217415	0.0217415
								0.0217415	0.0217415
								0.0434831	0.0217415
								0.0217415	0.0652246
								0.0217415	0.0217415
								0.0434831	0.0217415
								0.130449	0.0217415
								0.0217415	0.0434831
								0.0434831	0.0217415
								0.0217415	0.0217415
								0.0434831	0.0434831
								0.0217415	0.0217415
								0.0217415	0.0869661
								0.0217415	0.0217415
								0.0434831	0.0217415
								0.0217415	0.0652246
								0.0652246	0.0434831
								0.0434831	0.0217415
								0.0217415	0.0217415
								0.0217415	0.108708
								0.0217415	0.0217415
								0.173932	0.173932
								0.0217415	0.130449
								0.0434831	0.0434831
								0.0217415	0.0217415
								0.0217415	0.0217415
								0.0217415	1.6741
								0.0217415	0.0434831
								0.0434831	0.0217415
								0.108708	0.326123
								0.0434831	0.0652246
								0.0652246	0.0217415
								0.0217415	0.500055
								0.0434831	0.0434831
								0.0217415	0.0217415
								0.0217415	0.0434831
								0.0217415	0.0217415
								0.0217415	0.0217415
								0.0217415	0.0217415
								0.0217415	0.0217415
								0.0217415	0.0434831
								0.0869661	0.0869661
								0.0217415	0.0434831
								0.0217415	0.0217415
								0.0217415	0.0217415
								0.0217415	0.0217415
								0.130449	0.0217415
								0.0434831	0.0217415
								0.0217415	0.0217415
								0.0217415	0.0217415
								0.0434831	0.0217415
								0.0217415	0.0869661
								0.0217415	0.0434831
								0.0217415	0.0217415
								0.0217415	0.0434831
								0.0217415	0.0217415
								0.0217415	0.0217415
								0.0217415	0.0434831
								0.0217415	0.0434831
								0.0652246	0.0217415
								0.0217415	0.0434831
								0.0217415	0.152191
								0.0217415	0.0434831
								0.0217415	0.0217415
								0.0217415	0.0652246
								0.0217415	0.0217415
								0.0434831	0.0217415
								0.0217415	0.0217415
								0.0217415	0.0217415
								0.0434831	0.0217415
								0.0217415	0.0434831
								0.0217415	0.195674
								0.0217415	0.0217415
								0.0217415	0.173932
								0.0217415	0.0217415
								0.130449	0.0217415
								0.0217415	0.0652246
								0.0217415	0.217415
								0.0434831	0.0217415
								0.0217415	0.0217415
								0.0434831	0.217415
								0.0434831	0.0217415
								0.0652246	0.0217415
								0.0217415	0.0217415
								0.0869661	0.0217415
								0.0217415	0.0217415
								0.0869661	0.0652246
								0.0434831	0.0434831
								0.0217415	0.0217415
								0.0217415	0.0217415
								0.0217415	0.0217415
								0.108708	0.0217415
								0.0434831	0.0434831
								0.0217415	0.0434831
								0.0869661	0.0217415
								0.0217415	0.0217415
								0.0217415	0.0217415
								0.0217415	0.0217415
								0.478314	0.0434831
								0.108708	0.0217415
								0.0652246	0.0434831
								0.0217415	0.0217415
								0.0434831	0.0869661
								0.0217415	0.0217415
								0.0652246	0.0217415
								0.0217415	0.0217415
								0.0217415	0.0217415
								0.0217415	0.0217415
								0.0217415	0.0434831
								0.0217415	0.108708
								0.0217415	0.0217415
								0.0434831	0.0217415
								0.0217415	0.0217415
								0.0217415	0.0217415
								0.0434831	0.0217415
								0.0652246	0.108708
								0.195674	0.0217415
								0.0434831	0.0217415
								0.0434831	0.0217415
								0.0217415	0.28264
								0.0217415	0.152191
								0.304381	0.0217415
								0.0217415	0.0217415
								0.0217415	0.0434831
								0.0217415	0.0217415
								0.0217415	0.0434831
								0.0217415	0.0217415
								0.130449	0.0217415
								0.0869661	0.0869661
								0.0217415	0.0434831
								0.0217415	0.0217415
								0.0217415	0.0217415
								0.0652246	0.28264
								0.0217415	0.0217415
								0.108708	0.0217415
								0.0217415	0.0217415
								0.0217415	0.0217415
								0.0652246	0.0217415
								0.0217415	0.369606
								0.0434831	0.0434831
								0.0434831	0.0217415
								0.0217415	0.0434831
								0.0217415	0.0434831
								0.0217415	0.0217415
								0.0434831	0.0217415
								0.173932	0.130449
								0.0217415	0.0217415
								0.0217415	0.0217415
								0.0217415	0.0217415
								0.0434831	0.0217415
								0.434831	0.0217415
								0.0217415	0.108708
								0.0434831	0.0217415
								0.0434831	0.0217415
								0.0217415	0.0217415
								0.0217415	0.0652246
								0.0217415	0.0217415
								0.0217415	0.0217415
								0.0217415	0.0217415
								0.0434831	0.0217415
								0.0217415	0.0217415
								0.0217415	0.0217415
								0.0217415	0.0217415
								0.0434831	0.0217415
								0.0652246	0.0217415
								0.0217415	0.0217415
								0.0217415	0.130449
								0.434831	0.0434831
								0.0217415	0.0652246
								0.0217415	0.0217415
								0.0217415	0.152191
								0.0217415	0.0217415
								0.217415	0.0217415
								0.0217415	0.0869661
								0.0434831	0.0217415
								0.195674	0.0217415
								0.0217415	0.0217415
								0.0217415	0.0217415
								0.760954	0.0217415
								0.0217415	0.0217415
								0.0434831	0.0217415
								0.0434831	0.0434831
								0.0869661	0.0217415
								0.0217415	0.630504
								0.0434831	0.0434831
								0.0217415	0.0217415
								0.0217415	0.0217415
								0.0217415	0.0217415
								0.0434831	0.0217415
								0.0217415	0.0869661
								0.0217415	0.304381
								0.0434831	0.0217415
								0.0217415	0.0652246
								0.0434831	0.0434831
								0.0217415	0.0652246
								0.0217415	0.0869661
								0.0217415	0.0434831
								0.0217415	0.0217415
								0.0217415	0.0217415
								0.0434831	0.0217415
								0.0434831	0.0217415
								0.0217415	0.0652246
								1.54365	0.0434831
								0.0217415	0.0217415
								0.0217415	0.0652246
								0.0217415	0.0217415
								0.0434831	0.0217415
								0.0652246	0.0217415
								0.0217415	0.0869661
								0.0217415	0.0217415
								0.0217415	0.0217415
								0.0652246	0.0217415
								0.0869661	0.0217415
								0.0217415	0.0869661
								0.0217415	0.0217415
								0.130449	0.0217415
								0.0217415	0.0217415
								0.0869661	0.0217415
								0.0217415	0.0217415
								0.0652246	0.0217415
								0.0434831	0.0217415
								0.0217415	0.0434831
								0.0217415	0.0217415
								0.0217415	0.0217415
								0.0217415	0.0652246
								0.0652246	0.0652246
								0.0652246	1.26101
								0.0434831	0.0434831
								0.0217415	0.0217415
								0.0217415	0.0652246
								0.0434831	0.0217415
								0.130449	0.0217415
								0.0217415	0.0217415
								0.0217415	0.0217415
								0.0217415	0.0434831
								1.52191	0.0217415
								0.0434831	0.0217415
								0.0217415	0.195674
								0.0217415	2.3046
								0.0434831	0.0217415
								0.0217415	1.43494
								0.173932	0.0217415
								0.0217415	0.0217415
								0.0217415	0.0217415
								0.0652246	0.304381
								0.0217415	0.0217415
								0.130449	0.152191
								0.0217415	0.0217415
								0.0217415	0.108708
								0.0217415	0.0217415
								0.0652246	0.0217415
								0.0434831	0.0869661
								0.0652246	0.0434831
								0.0217415	0.108708
								0.0217415	0.130449
								0.0217415	0.0217415
								0.152191	0.108708
								0.0217415	0.0869661
								0.369606	0.0217415
								0.0434831	0.0217415
								0.0217415	0.0869661
								0.0434831	0.0217415
								0.0217415	0.0434831
								0.0434831	0.0217415
								1.23927	0.0217415
								0.0217415	0.0217415
								0.0869661	0.304381
								0.0217415	0.0434831
								1.23927	0.0434831
								0.0434831	0.0434831
								0.0217415	0.0217415
								0.108708	0.0217415
								0.0217415	0.0217415
								0.0217415	0.0217415
								0.0217415	0.0217415
								0.0434831	0.0652246
								0.0217415	0.0652246
								0.0869661	0.0434831
								0.0434831	0.304381
								0.0869661	0.0217415
								0.0217415	0.0217415
								0.0217415	0.0217415
								0.0217415	0.0217415
								0.0434831	0.0217415
								0.0217415	0.0434831
								0.0869661	0.0434831
								0.0217415	0.0217415
								0.0217415	0.0217415
								0.0217415	0.0434831
								0.130449	0.0217415
								0.0217415	0.0869661
								1.34797	0.0217415
								0.0434831	0.108708
								0.0217415	0.0434831
								0.0652246	0.0217415
								0.0434831	0.0217415
								0.152191	0.0217415
								0.0217415	0.0652246
								0.0217415	0.0217415
								0.0217415	0.0434831
								0.0217415	0.0217415
								0.0217415	0.28264
								0.0434831	0.0217415
								0.0434831	0.0217415
								0.0652246	0.0217415
								0.108708	0.0869661
								0.108708	0.0434831
								0.173932	0.0217415
								0.0434831	0.0217415
								0.0434831	0.0217415
								0.0434831	0.0217415
								0.0217415	0.0217415
								0.0434831	0.0434831
								0.0217415	0.0434831
								0.0217415	0.0217415
								0.0217415	0.0217415
								0.0217415	0.826178
								0.0217415	0.0217415
								0.0217415	0.0434831
								0.0217415	0.0217415
								0.0217415	0.0217415
								0.0434831	0.0217415
								0.0217415	0.0652246
								0.0217415	0.0217415
								0.478314	0.0217415
								0.0217415	0.0217415
								0.108708	0.0217415
								0.0217415	0.260898
								0.0434831	0.0217415
								0.0217415	0.0217415
								0.0652246	0.0217415
								0.0217415	0.0217415
								0.0217415	0.152191
								0.0434831	0.0652246
								0.0217415	0.0217415
								0.0217415	0.0217415
								0.0217415	0.0217415
								0.0217415	0.0217415
								0.173932	0.130449
								0.0217415	0.0217415
								0.0217415	0.0434831
								0.0217415	0.0217415
								0.0217415	0.0217415
								0.0217415	0.0217415
								0.0217415	0.0217415
								0.0217415	0.0217415
								0.0217415	0.0217415
								0.0217415	0.0217415
								0.0434831	0.0217415
								0.0434831	0.0217415
								0.195674	0.0217415
								0.173932	0.0652246
								0.0434831	0.0434831
								0.152191	0.0217415
								0.0434831	0.0217415
								0.0217415	0.0652246
								0.0217415	0.152191
								0.0217415	0.0217415
								0.0217415	0.760954
								0.0217415	0.0434831
								0.0434831	0.0217415
								0.0217415	0.0434831
								0.0217415	0.0652246
								0.0217415	0.0217415
								0.0217415	0.0217415
								0.0217415	0.0217415
									0.0217415
									0.0217415
									0.0869661
									0.0217415
									0.0217415
									0.0869661
									0.0217415
									0.0434831
									0.0217415
									0.0434831
									0.0434831
									0.0217415
									0.0217415
									0.0434831
									0.0217415
									0.0217415
									0.0217415
									0.0217415
									0.0217415
									0.0217415
									0.0434831
									0.0217415
									0.0217415
									0.0869661
									0.152191
									0.0217415
									0.130449
									0.0217415
									0.0217415
									0.0652246
									0.0217415
									0.0217415
									0.0217415
									0.0217415
									0.0217415
									0.195674
									0.0434831
									0.0217415
									0.0217415
									0.0217415
									0.0869661
									0.0217415
									0.0434831
									0.0217415
									0.0217415
