# Supplementary material for: Molecular dissection of PI3Kβ synergistic activation by receptor tyrosine kinases, GβGγ, and Rho-family GTPases
Source: eLife. 2024 May 7;12:RP88991. doi: 10.7554/eLife.88991 (PMC11076043; doi:10.7554/eLife.88991)
Supplement: Figure 3—figure supplement 1—source data 1. [file elife-88991-fig3-figsupp1-data1.xlsx]

## Sheet: Fig 3 - FS1A
Figure 3 -	Single molecule dwell time distribution
figure supplement 1A
	movie	mov1		RAW Dwell time (sec)	Bin (sec)	freq	1-CDF
10 nM Dy647-PI3KB	alpha	0.6519		0.0517417	0	0	1
200 nM GbGg	T1 (sec)	0.03985		0.0517417	0.052	0.566026	0.433974
no pY	T2 (sec)	0.1686		0.0517417	0.104	0.770924	0.229076
	N	3226		0.0517417	0.156	0.8385	0.1615
	AVE DT (sec)	0.115946		0.206967	0.208	0.893986	0.106014
				0.103483	0.26	0.927154	0.0728456
				0.0517417	0.312	0.951643	0.0483571
				0.0517417	0.364	0.963732	0.0362678
				0.0517417	0.416	0.972412	0.0275883
				0.0517417	0.468	0.978921	0.0210787
				0.0517417	0.52	0.981711	0.0182889
				0.103483	0.572	0.985121	0.0148791
				0.0517417	0.624	0.988841	0.0111593
				0.103483	0.676	0.990701	0.00929944
				0.672643	0.728	0.991631	0.0083695
				0.0517417	0.78	0.99194	0.00805952
				0.0517417	0.832	0.99318	0.00681959
				0.0517417	0.884	0.99442	0.00557967
				0.31045	0.936	0.99628	0.00371978
				0.0517417	0.988	0.99628	0.00371978
				0.103483	1.04	0.99721	0.00278983
				0.103483	1.092	0.99721	0.00278983
				0.103483	1.144	0.99783	0.00216987
				0.103483	1.196	0.99783	0.00216987
				0.0517417	1.248	0.99876	0.00123993
				0.103483	1.3	0.99876	0.00123993
				0.0517417	1.352	0.99938	0.000619963
				0.0517417	1.404	0.99938	0.000619963
				0.0517417	1.456	0.99969	0.000309981
				0.0517417	1.508	0.99969	0.000309981
				1.13832	1.56	1	0
				0.0517417
				0.0517417
				0.0517417
				0.0517417
				0.103483
				0.0517417
				0.103483
				0.0517417
				0.0517417
				0.0517417
				1.03483
				0.103483
				0.0517417
				0.0517417
				0.0517417
				0.0517417
				0.0517417
				0.0517417
				0.0517417
				0.0517417
				0.103483
				0.103483
				0.103483
				0.0517417
				0.0517417
				0.103483
				0.0517417
				0.413934
				0.0517417
				0.0517417
				0.103483
				0.0517417
				0.0517417
				0.103483
				0.0517417
				0.0517417
				0.0517417
				0.0517417
				0.569159
				0.0517417
				0.0517417
				0.0517417
				0.103483
				1.44877
				0.206967
				0.206967
				0.0517417
				0.0517417
				0.0517417
				0.0517417
				0.0517417
				0.0517417
				0.0517417
				0.0517417
				0.0517417
				0.0517417
				0.103483
				0.155225
				0.0517417
				0.0517417
				0.0517417
				0.0517417
				0.0517417
				0.0517417
				0.0517417
				0.0517417
				0.103483
				0.0517417
				0.31045
				0.155225
				0.155225
				0.0517417
				0.0517417
				0.0517417
				0.31045
				0.0517417
				0.103483
				0.103483
				0.0517417
				0.0517417
				0.0517417
				0.0517417
				0.827868
				0.0517417
				0.103483
				0.0517417
				0.0517417
				0.103483
				0.0517417
				0.0517417
				0.0517417
				0.103483
				0.569159
				0.155225
				0.0517417
				0.0517417
				0.103483
				0.0517417
				0.0517417
				0.206967
				0.0517417
				0.0517417
				0.0517417
				0.0517417
				0.0517417
				0.258709
				0.0517417
				0.0517417
				0.0517417
				0.155225
				0.155225
				0.0517417
				0.0517417
				0.155225
				0.0517417
				0.103483
				0.103483
				0.0517417
				0.0517417
				0.0517417
				0.0517417
				0.0517417
				0.0517417
				0.0517417
				0.103483
				0.103483
				0.0517417
				0.0517417
				0.0517417
				0.258709
				0.0517417
				0.103483
				0.103483
				0.0517417
				0.0517417
				0.0517417
				0.0517417
				0.103483
				0.0517417
				0.0517417
				0.0517417
				0.0517417
				0.0517417
				0.0517417
				0.103483
				0.258709
				0.155225
				0.0517417
				0.0517417
				0.0517417
				1.03483
				0.258709
				0.103483
				0.0517417
				0.103483
				0.0517417
				0.0517417
				0.206967
				0.103483
				0.0517417
				0.0517417
				0.0517417
				0.0517417
				0.0517417
				0.206967
				0.0517417
				0.206967
				0.103483
				0.672643
				0.103483
				0.0517417
				0.0517417
				0.206967
				0.103483
				0.103483
				0.258709
				0.103483
				0.103483
				0.0517417
				0.103483
				0.0517417
				0.31045
				0.0517417
				0.155225
				0.0517417
				0.0517417
				0.103483
				0.0517417
				0.0517417
				0.103483
				0.0517417
				0.0517417
				0.0517417
				0.413934
				0.103483
				0.0517417
				0.103483
				0.465676
				0.103483
				0.0517417
				0.0517417
				0.103483
				0.206967
				0.103483
				0.0517417
				0.0517417
				0.0517417
				0.0517417
				0.0517417
				0.0517417
				0.103483
				0.155225
				0.0517417
				0.0517417
				0.0517417
				0.155225
				0.827868
				0.103483
				0.0517417
				0.0517417
				0.0517417
				0.0517417
				0.0517417
				0.0517417
				0.465676
				0.31045
				0.103483
				0.103483
				0.0517417
				0.103483
				0.0517417
				0.103483
				0.0517417
				0.0517417
				0.0517417
				0.103483
				0.258709
				0.103483
				0.155225
				0.0517417
				0.931351
				0.0517417
				0.155225
				0.0517417
				0.413934
				0.206967
				0.0517417
				0.0517417
				0.0517417
				0.0517417
				0.0517417
				0.0517417
				0.0517417
				0.569159
				0.103483
				0.103483
				0.258709
				0.258709
				0.206967
				0.155225
				0.0517417
				0.206967
				0.31045
				0.103483
				0.0517417
				0.103483
				0.0517417
				0.206967
				0.465676
				0.0517417
				0.258709
				0.0517417
				0.0517417
				0.0517417
				0.258709
				0.0517417
				0.103483
				0.0517417
				0.206967
				0.103483
				0.0517417
				0.0517417
				0.103483
				0.103483
				0.103483
				0.103483
				0.0517417
				0.0517417
				0.0517417
				0.0517417
				0.206967
				0.569159
				0.206967
				0.103483
				0.0517417
				0.103483
				0.0517417
				0.0517417
				0.155225
				0.0517417
				0.155225
				0.155225
				0.103483
				0.0517417
				0.0517417
				0.103483
				0.103483
				0.0517417
				0.0517417
				0.0517417
				0.0517417
				0.155225
				0.103483
				0.0517417
				0.155225
				0.258709
				0.103483
				0.103483
				0.0517417
				0.31045
				0.0517417
				0.0517417
				0.0517417
				0.0517417
				0.0517417
				0.0517417
				0.0517417
				0.0517417
				0.0517417
				0.258709
				0.0517417
				0.0517417
				0.0517417
				0.206967
				0.103483
				0.258709
				0.103483
				0.103483
				0.0517417
				0.0517417
				0.0517417
				0.103483
				0.0517417
				0.0517417
				0.0517417
				0.0517417
				0.258709
				0.103483
				0.569159
				0.0517417
				0.0517417
				0.155225
				0.103483
				0.0517417
				0.103483
				0.103483
				0.31045
				0.0517417
				0.0517417
				0.0517417
				0.0517417
				0.0517417
				0.103483
				0.103483
				0.103483
				0.103483
				0.155225
				0.87961
				0.258709
				0.0517417
				0.0517417
				0.0517417
				0.103483
				0.0517417
				0.517417
				0.0517417
				0.0517417
				0.0517417
				0.0517417
				0.0517417
				0.103483
				0.155225
				0.103483
				0.0517417
				0.413934
				0.0517417
				0.155225
				0.0517417
				0.103483
				0.258709
				0.0517417
				0.258709
				0.155225
				0.155225
				0.155225
				0.258709
				0.0517417
				0.103483
				0.103483
				0.0517417
				0.0517417
				0.0517417
				0.0517417
				0.0517417
				0.0517417
				0.0517417
				0.0517417
				0.0517417
				0.103483
				0.206967
				0.103483
				0.103483
				0.258709
				0.31045
				0.0517417
				0.0517417
				0.103483
				0.0517417
				0.0517417
				0.0517417
				0.0517417
				0.0517417
				0.0517417
				0.0517417
				0.103483
				0.155225
				0.465676
				0.0517417
				0.103483
				0.0517417
				0.0517417
				0.258709
				0.0517417
				0.206967
				0.155225
				0.258709
				0.103483
				0.0517417
				0.0517417
				0.0517417
				0.103483
				0.103483
				0.0517417
				0.0517417
				0.0517417
				0.362192
				0.206967
				0.31045
				0.103483
				0.155225
				0.103483
				0.103483
				0.103483
				0.0517417
				0.103483
				0.103483
				0.0517417
				0.0517417
				0.0517417
				0.0517417
				0.0517417
				0.103483
				0.0517417
				0.0517417
				0.0517417
				0.0517417
				0.0517417
				0.0517417
				0.0517417
				0.362192
				0.0517417
				0.0517417
				0.155225
				0.31045
				0.0517417
				0.620901
				0.103483
				0.103483
				0.0517417
				0.0517417
				0.0517417
				0.0517417
				0.0517417
				0.362192
				0.0517417
				0.0517417
				0.0517417
				0.103483
				0.0517417
				0.0517417
				0.0517417
				0.103483
				0.0517417
				0.103483
				0.0517417
				0.206967
				0.0517417
				0.0517417
				0.0517417
				0.0517417
				0.0517417
				0.155225
				0.362192
				0.103483
				0.103483
				0.258709
				0.31045
				0.465676
				0.103483
				0.155225
				0.0517417
				0.0517417
				0.206967
				0.0517417
				0.155225
				0.0517417
				0.103483
				0.0517417
				0.0517417
				0.0517417
				0.0517417
				0.0517417
				0.206967
				0.103483
				0.0517417
				0.103483
				0.155225
				0.0517417
				0.0517417
				0.103483
				0.0517417
				0.258709
				0.0517417
				1.13832
				0.0517417
				0.0517417
				0.0517417
				0.103483
				0.413934
				0.155225
				0.31045
				0.0517417
				0.0517417
				0.0517417
				0.0517417
				0.0517417
				0.155225
				0.103483
				0.0517417
				0.0517417
				0.0517417
				0.620901
				0.0517417
				0.0517417
				0.0517417
				0.0517417
				0.31045
				0.413934
				0.155225
				0.103483
				0.103483
				0.0517417
				0.103483
				0.0517417
				0.0517417
				0.103483
				0.0517417
				0.0517417
				0.0517417
				0.0517417
				0.0517417
				0.0517417
				0.103483
				0.206967
				0.0517417
				0.0517417
				0.0517417
				0.0517417
				0.362192
				0.103483
				0.103483
				0.31045
				0.0517417
				0.155225
				0.103483
				0.31045
				0.0517417
				0.0517417
				0.103483
				0.0517417
				0.0517417
				0.0517417
				0.0517417
				0.0517417
				0.0517417
				0.31045
				0.0517417
				0.206967
				0.103483
				0.258709
				0.103483
				0.0517417
				0.155225
				0.103483
				0.103483
				0.0517417
				0.413934
				0.31045
				0.206967
				0.0517417
				0.103483
				0.0517417
				0.0517417
				0.0517417
				0.0517417
				0.0517417
				0.0517417
				0.0517417
				0.0517417
				0.0517417
				0.103483
				0.103483
				0.0517417
				0.155225
				0.206967
				0.0517417
				0.103483
				0.103483
				0.413934
				0.155225
				0.103483
				0.0517417
				0.0517417
				0.0517417
				0.0517417
				0.103483
				0.0517417
				0.0517417
				0.362192
				0.0517417
				0.0517417
				0.0517417
				0.0517417
				0.103483
				0.0517417
				0.103483
				0.206967
				0.0517417
				0.0517417
				0.206967
				0.0517417
				0.103483
				1.2418
				0.103483
				0.0517417
				0.0517417
				0.0517417
				0.0517417
				0.258709
				0.103483
				0.206967
				0.0517417
				0.206967
				0.0517417
				0.362192
				0.0517417
				0.0517417
				0.206967
				0.0517417
				0.569159
				0.0517417
				0.103483
				0.0517417
				0.0517417
				0.0517417
				0.0517417
				0.31045
				0.103483
				0.0517417
				0.0517417
				0.155225
				0.103483
				0.103483
				0.0517417
				0.155225
				0.0517417
				0.0517417
				0.103483
				0.0517417
				0.0517417
				0.0517417
				0.0517417
				0.0517417
				0.362192
				0.206967
				0.31045
				0.103483
				0.0517417
				0.0517417
				0.0517417
				0.0517417
				0.103483
				0.103483
				0.206967
				0.0517417
				0.103483
				0.103483
				0.103483
				0.103483
				0.0517417
				0.31045
				0.103483
				0.206967
				0.0517417
				0.31045
				0.103483
				0.0517417
				0.155225
				0.672643
				0.0517417
				0.155225
				0.0517417
				0.0517417
				0.103483
				0.0517417
				0.0517417
				0.0517417
				0.258709
				0.0517417
				0.206967
				0.206967
				0.0517417
				0.103483
				0.155225
				0.103483
				0.0517417
				0.0517417
				0.362192
				0.103483
				0.0517417
				0.103483
				0.0517417
				0.0517417
				0.103483
				0.0517417
				0.31045
				0.0517417
				0.0517417
				0.31045
				0.0517417
				0.0517417
				0.206967
				0.103483
				0.0517417
				0.103483
				0.258709
				0.0517417
				0.0517417
				0.0517417
				0.103483
				0.0517417
				0.0517417
				0.0517417
				0.0517417
				0.0517417
				0.0517417
				0.0517417
				0.0517417
				0.0517417
				0.0517417
				0.0517417
				0.0517417
				0.0517417
				0.0517417
				0.0517417
				0.206967
				0.0517417
				0.0517417
				0.0517417
				0.0517417
				0.103483
				0.0517417
				0.0517417
				0.0517417
				0.0517417
				0.0517417
				0.0517417
				0.0517417
				0.0517417
				0.0517417
				0.0517417
				0.672643
				0.87961
				0.0517417
				0.103483
				0.0517417
				0.103483
				0.103483
				0.103483
				0.0517417
				0.0517417
				0.0517417
				0.0517417
				0.0517417
				0.0517417
				0.0517417
				0.0517417
				0.0517417
				0.155225
				0.0517417
				0.0517417
				0.0517417
				0.103483
				0.103483
				0.724384
				0.103483
				0.413934
				0.103483
				0.0517417
				0.0517417
				0.0517417
				0.0517417
				0.517417
				0.258709
				0.258709
				0.155225
				0.206967
				0.0517417
				0.0517417
				0.103483
				0.0517417
				0.103483
				0.0517417
				0.0517417
				0.103483
				0.0517417
				0.0517417
				0.0517417
				0.155225
				0.103483
				0.103483
				0.0517417
				0.31045
				0.0517417
				0.0517417
				0.103483
				0.103483
				0.155225
				0.0517417
				0.103483
				0.103483
				0.0517417
				0.0517417
				0.0517417
				0.0517417
				0.103483
				0.0517417
				0.0517417
				0.206967
				0.672643
				0.0517417
				0.206967
				0.103483
				0.31045
				0.0517417
				0.0517417
				0.0517417
				0.0517417
				0.103483
				0.258709
				0.569159
				0.258709
				0.206967
				0.0517417
				0.0517417
				0.0517417
				0.0517417
				0.0517417
				0.103483
				0.258709
				0.206967
				0.0517417
				0.258709
				0.0517417
				0.155225
				0.103483
				0.0517417
				0.0517417
				0.258709
				0.0517417
				0.0517417
				0.0517417
				0.0517417
				0.0517417
				0.0517417
				0.0517417
				0.103483
				0.0517417
				0.0517417
				0.155225
				0.258709
				0.155225
				0.0517417
				0.0517417
				0.0517417
				0.0517417
				0.103483
				0.620901
				0.0517417
				0.0517417
				0.0517417
				0.0517417
				0.103483
				0.103483
				0.206967
				0.0517417
				0.206967
				0.206967
				0.155225
				0.0517417
				0.0517417
				0.206967
				0.0517417
				0.0517417
				0.0517417
				0.0517417
				0.0517417
				0.0517417
				0.103483
				0.103483
				0.103483
				0.31045
				0.0517417
				0.206967
				0.0517417
				0.31045
				0.103483
				0.0517417
				0.155225
				0.206967
				0.206967
				0.103483
				0.0517417
				0.0517417
				0.0517417
				0.0517417
				0.206967
				0.413934
				0.0517417
				0.0517417
				0.0517417
				0.0517417
				0.0517417
				0.0517417
				0.0517417
				0.0517417
				0.155225
				0.0517417
				0.103483
				0.155225
				0.103483
				0.465676
				0.0517417
				0.724384
				0.0517417
				0.0517417
				0.0517417
				0.155225
				0.0517417
				0.0517417
				0.258709
				0.0517417
				0.258709
				0.0517417
				0.0517417
				0.0517417
				0.155225
				0.258709
				0.206967
				0.155225
				0.206967
				0.0517417
				0.103483
				0.103483
				0.0517417
				0.103483
				0.258709
				0.103483
				0.103483
				0.31045
				0.0517417
				0.0517417
				0.0517417
				0.103483
				0.0517417
				0.0517417
				0.0517417
				0.103483
				0.0517417
				0.0517417
				0.103483
				0.103483
				0.0517417
				0.0517417
				0.103483
				0.0517417
				0.0517417
				0.0517417
				0.0517417
				0.206967
				0.155225
				0.258709
				0.0517417
				0.0517417
				0.0517417
				0.0517417
				0.103483
				0.0517417
				0.0517417
				0.103483
				0.0517417
				0.103483
				0.0517417
				0.0517417
				0.0517417
				0.0517417
				0.103483
				0.0517417
				0.0517417
				0.0517417
				0.103483
				0.0517417
				0.0517417
				0.0517417
				0.0517417
				0.0517417
				0.0517417
				0.0517417
				0.0517417
				0.0517417
				0.103483
				0.31045
				0.620901
				0.0517417
				0.413934
				0.0517417
				0.0517417
				0.258709
				0.155225
				0.0517417
				0.103483
				0.0517417
				0.517417
				0.103483
				0.0517417
				0.620901
				0.0517417
				0.0517417
				0.0517417
				0.103483
				0.0517417
				0.0517417
				0.0517417
				0.103483
				1.2418
				0.0517417
				0.0517417
				0.0517417
				0.258709
				0.0517417
				0.0517417
				0.155225
				0.103483
				0.0517417
				0.0517417
				0.103483
				0.0517417
				0.0517417
				0.0517417
				0.0517417
				0.931351
				0.258709
				0.155225
				0.0517417
				0.0517417
				0.103483
				0.103483
				0.103483
				0.155225
				0.0517417
				0.0517417
				0.0517417
				0.155225
				0.103483
				0.103483
				0.0517417
				0.0517417
				0.0517417
				0.0517417
				0.0517417
				0.0517417
				0.0517417
				0.0517417
				0.103483
				0.0517417
				0.103483
				0.0517417
				0.103483
				0.0517417
				0.0517417
				0.0517417
				0.0517417
				0.31045
				0.0517417
				0.103483
				0.0517417
				0.103483
				0.103483
				0.0517417
				0.206967
				0.0517417
				0.0517417
				0.0517417
				0.258709
				0.0517417
				0.0517417
				0.0517417
				0.103483
				0.103483
				0.31045
				0.0517417
				0.155225
				0.0517417
				0.0517417
				0.0517417
				0.0517417
				0.0517417
				0.0517417
				0.103483
				0.0517417
				0.0517417
				0.0517417
				0.0517417
				0.0517417
				0.0517417
				0.0517417
				0.0517417
				0.0517417
				0.206967
				0.103483
				0.31045
				0.155225
				0.103483
				0.206967
				0.0517417
				0.155225
				0.31045
				0.103483
				0.103483
				0.0517417
				0.0517417
				0.0517417
				0.0517417
				0.0517417
				0.206967
				0.0517417
				0.155225
				0.413934
				0.0517417
				0.0517417
				0.0517417
				0.0517417
				0.0517417
				0.31045
				0.0517417
				0.0517417
				0.206967
				0.0517417
				0.206967
				0.155225
				0.0517417
				0.0517417
				0.155225
				0.103483
				0.0517417
				0.0517417
				0.103483
				0.0517417
				0.103483
				0.103483
				0.258709
				0.155225
				0.155225
				0.0517417
				0.103483
				0.155225
				0.517417
				0.103483
				0.103483
				0.362192
				0.0517417
				0.155225
				0.103483
				0.0517417
				0.0517417
				0.0517417
				0.0517417
				0.0517417
				0.0517417
				0.0517417
				0.0517417
				0.0517417
				0.258709
				0.0517417
				0.258709
				0.0517417
				0.258709
				0.0517417
				0.0517417
				0.155225
				0.0517417
				0.0517417
				0.0517417
				0.0517417
				0.0517417
				0.0517417
				0.103483
				0.103483
				0.103483
				1.55225
				0.0517417
				0.0517417
				0.0517417
				0.413934
				0.362192
				0.0517417
				0.155225
				0.0517417
				0.0517417
				0.0517417
				0.103483
				0.0517417
				0.0517417
				0.103483
				0.155225
				0.0517417
				0.155225
				0.155225
				0.0517417
				0.0517417
				0.0517417
				0.0517417
				0.0517417
				0.0517417
				0.206967
				0.569159
				0.0517417
				0.206967
				0.103483
				0.0517417
				0.0517417
				0.0517417
				0.0517417
				0.465676
				0.0517417
				0.0517417
				0.0517417
				0.0517417
				0.0517417
				0.0517417
				0.0517417
				0.258709
				0.931351
				0.103483
				0.0517417
				0.0517417
				0.0517417
				0.103483
				0.0517417
				0.0517417
				0.0517417
				0.0517417
				0.103483
				0.0517417
				0.206967
				0.103483
				0.206967
				0.103483
				0.103483
				0.0517417
				0.103483
				0.0517417
				0.0517417
				0.206967
				0.155225
				0.0517417
				0.258709
				0.362192
				0.0517417
				0.0517417
				0.103483
				0.0517417
				0.0517417
				0.0517417
				0.258709
				0.0517417
				0.206967
				0.0517417
				0.0517417
				0.0517417
				0.0517417
				0.0517417
				0.0517417
				0.206967
				0.0517417
				0.0517417
				0.103483
				0.0517417
				0.0517417
				0.155225
				0.206967
				0.206967
				0.0517417
				0.103483
				0.0517417
				0.569159
				0.0517417
				0.0517417
				0.103483
				0.0517417
				0.0517417
				0.103483
				0.0517417
				0.0517417
				0.206967
				0.0517417
				0.0517417
				0.103483
				0.206967
				0.0517417
				0.103483
				0.103483
				0.0517417
				0.0517417
				0.103483
				0.0517417
				0.206967
				0.0517417
				0.103483
				0.0517417
				0.0517417
				0.0517417
				0.206967
				0.0517417
				0.103483
				0.103483
				0.0517417
				0.0517417
				0.0517417
				0.0517417
				0.0517417
				0.258709
				0.0517417
				0.31045
				0.103483
				0.620901
				0.362192
				0.0517417
				0.103483
				0.103483
				0.0517417
				0.724384
				0.0517417
				0.103483
				0.0517417
				0.0517417
				0.155225
				0.0517417
				0.0517417
				0.0517417
				0.206967
				0.31045
				0.0517417
				0.0517417
				0.0517417
				0.103483
				0.103483
				0.0517417
				0.103483
				0.0517417
				0.31045
				0.0517417
				0.0517417
				0.0517417
				0.0517417
				0.0517417
				0.155225
				0.103483
				0.0517417
				0.103483
				0.103483
				0.0517417
				0.155225
				0.258709
				0.206967
				0.827868
				0.206967
				0.0517417
				0.0517417
				0.0517417
				0.0517417
				0.0517417
				0.0517417
				0.0517417
				0.31045
				0.103483
				0.0517417
				0.465676
				0.0517417
				0.258709
				0.0517417
				0.0517417
				0.0517417
				0.0517417
				0.155225
				0.0517417
				0.155225
				0.0517417
				0.103483
				0.0517417
				0.258709
				0.0517417
				0.0517417
				0.0517417
				0.0517417
				0.0517417
				0.0517417
				0.0517417
				0.0517417
				0.206967
				0.0517417
				0.0517417
				0.0517417
				0.103483
				0.103483
				0.0517417
				0.0517417
				0.362192
				0.0517417
				0.206967
				0.103483
				0.0517417
				0.103483
				0.0517417
				0.0517417
				0.0517417
				0.0517417
				0.206967
				0.103483
				0.0517417
				0.155225
				0.103483
				0.206967
				0.155225
				0.0517417
				0.103483
				0.0517417
				0.0517417
				0.0517417
				0.206967
				0.413934
				0.0517417
				0.0517417
				0.103483
				0.0517417
				0.0517417
				0.31045
				0.103483
				0.0517417
				0.155225
				0.0517417
				0.0517417
				0.155225
				0.155225
				0.0517417
				0.0517417
				0.0517417
				0.0517417
				0.0517417
				0.0517417
				0.103483
				0.103483
				0.103483
				0.0517417
				0.0517417
				0.0517417
				0.31045
				0.362192
				0.0517417
				0.0517417
				0.0517417
				0.0517417
				0.0517417
				0.0517417
				0.0517417
				0.206967
				0.206967
				0.0517417
				0.0517417
				0.0517417
				0.206967
				0.0517417
				0.0517417
				0.103483
				0.0517417
				0.103483
				0.0517417
				0.258709
				0.155225
				0.0517417
				0.0517417
				0.0517417
				0.155225
				0.0517417
				0.0517417
				0.0517417
				0.0517417
				0.206967
				0.31045
				0.103483
				0.0517417
				0.0517417
				0.103483
				0.0517417
				0.31045
				0.0517417
				0.31045
				0.0517417
				0.206967
				0.0517417
				0.0517417
				0.0517417
				0.0517417
				0.0517417
				0.0517417
				0.0517417
				0.0517417
				0.103483
				0.206967
				0.103483
				0.0517417
				0.103483
				0.0517417
				0.103483
				0.103483
				0.0517417
				0.0517417
				0.0517417
				0.0517417
				0.103483
				0.0517417
				0.0517417
				0.0517417
				0.0517417
				0.258709
				0.0517417
				0.0517417
				0.103483
				0.155225
				0.0517417
				0.0517417
				0.465676
				0.0517417
				0.0517417
				0.0517417
				0.0517417
				0.103483
				0.0517417
				0.362192
				0.0517417
				0.0517417
				0.0517417
				0.103483
				0.0517417
				0.0517417
				0.0517417
				0.103483
				0.103483
				0.103483
				0.0517417
				0.0517417
				0.0517417
				0.0517417
				0.258709
				0.103483
				0.0517417
				0.103483
				0.0517417
				0.103483
				0.0517417
				0.103483
				0.0517417
				0.103483
				0.0517417
				0.103483
				0.258709
				0.103483
				0.0517417
				0.0517417
				0.0517417
				0.103483
				0.0517417
				0.103483
				0.206967
				0.0517417
				0.0517417
				0.0517417
				0.206967
				0.155225
				0.0517417
				0.0517417
				0.0517417
				0.0517417
				0.103483
				0.0517417
				0.0517417
				0.0517417
				0.0517417
				0.0517417
				0.0517417
				0.103483
				0.103483
				0.0517417
				0.155225
				0.258709
				0.0517417
				0.258709
				0.103483
				0.0517417
				0.206967
				0.0517417
				0.0517417
				0.0517417
				0.103483
				0.103483
				0.362192
				0.0517417
				0.258709
				0.0517417
				0.0517417
				0.0517417
				0.0517417
				0.155225
				0.0517417
				0.0517417
				0.0517417
				0.0517417
				0.0517417
				0.103483
				0.362192
				0.0517417
				0.206967
				0.0517417
				0.103483
				0.103483
				0.206967
				0.0517417
				0.103483
				0.155225
				0.103483
				0.0517417
				0.206967
				0.103483
				0.465676
				0.0517417
				0.0517417
				0.0517417
				0.0517417
				0.103483
				0.0517417
				0.206967
				0.0517417
				0.0517417
				0.0517417
				0.103483
				0.0517417
				0.0517417
				0.0517417
				0.31045
				0.0517417
				0.0517417
				0.155225
				0.155225
				0.0517417
				0.0517417
				0.0517417
				0.620901
				0.103483
				0.103483
				0.0517417
				0.155225
				0.103483
				0.155225
				0.31045
				0.31045
				0.0517417
				0.0517417
				0.0517417
				0.103483
				0.0517417
				0.0517417
				0.0517417
				0.258709
				0.517417
				0.206967
				0.155225
				0.0517417
				0.0517417
				0.103483
				0.0517417
				0.103483
				0.206967
				0.103483
				0.103483
				0.103483
				0.0517417
				0.103483
				0.0517417
				0.0517417
				0.0517417
				0.103483
				0.0517417
				0.0517417
				0.0517417
				0.103483
				0.0517417
				0.0517417
				0.155225
				0.103483
				0.0517417
				0.258709
				0.0517417
				0.103483
				0.0517417
				0.206967
				0.155225
				0.103483
				0.0517417
				0.103483
				0.0517417
				0.0517417
				0.103483
				0.258709
				0.0517417
				0.0517417
				0.155225
				0.155225
				0.0517417
				0.258709
				0.0517417
				0.0517417
				0.0517417
				0.0517417
				0.0517417
				0.103483
				0.103483
				0.103483
				0.672643
				0.827868
				0.0517417
				0.0517417
				0.0517417
				0.362192
				0.155225
				0.0517417
				0.0517417
				0.103483
				0.103483
				0.258709
				0.103483
				0.103483
				0.206967
				0.103483
				0.0517417
				0.0517417
				0.0517417
				0.0517417
				0.103483
				0.0517417
				0.0517417
				0.0517417
				0.103483
				0.0517417
				0.155225
				0.206967
				0.103483
				0.0517417
				0.206967
				0.0517417
				0.0517417
				0.206967
				0.0517417
				0.155225
				0.206967
				0.362192
				0.0517417
				0.103483
				0.206967
				0.103483
				0.103483
				0.0517417
				0.0517417
				0.206967
				0.155225
				0.155225
				0.0517417
				0.0517417
				0.0517417
				0.206967
				0.0517417
				0.0517417
				0.0517417
				0.103483
				0.0517417
				0.103483
				0.206967
				0.206967
				0.103483
				0.0517417
				0.0517417
				0.0517417
				0.206967
				0.103483
				0.103483
				0.0517417
				0.0517417
				0.155225
				0.0517417
				0.0517417
				0.0517417
				0.0517417
				0.0517417
				0.0517417
				0.103483
				0.155225
				0.0517417
				0.103483
				0.465676
				0.0517417
				0.103483
				0.0517417
				0.0517417
				0.0517417
				0.0517417
				0.103483
				0.103483
				0.569159
				0.31045
				0.103483
				0.0517417
				0.0517417
				0.0517417
				0.103483
				0.258709
				0.103483
				0.103483
				0.206967
				0.0517417
				0.0517417
				0.103483
				0.0517417
				0.0517417
				0.0517417
				0.258709
				0.103483
				0.103483
				0.0517417
				0.0517417
				0.103483
				0.0517417
				0.0517417
				0.103483
				0.103483
				0.103483
				0.155225
				0.155225
				0.0517417
				0.0517417
				0.103483
				0.0517417
				0.206967
				0.413934
				0.103483
				0.0517417
				0.103483
				0.0517417
				0.0517417
				0.0517417
				0.0517417
				0.0517417
				0.0517417
				0.103483
				0.0517417
				0.620901
				0.0517417
				0.0517417
				0.155225
				0.0517417
				0.206967
				0.155225
				0.103483
				0.0517417
				0.206967
				0.103483
				0.103483
				0.155225
				0.0517417
				0.0517417
				0.155225
				0.0517417
				0.155225
				0.103483
				0.0517417
				0.0517417
				0.206967
				0.0517417
				0.103483
				0.103483
				0.0517417
				0.206967
				0.103483
				0.103483
				0.0517417
				0.31045
				0.206967
				0.155225
				0.103483
				0.0517417
				0.0517417
				0.0517417
				0.103483
				0.103483
				0.0517417
				0.0517417
				0.0517417
				0.0517417
				0.0517417
				0.0517417
				0.0517417
				0.0517417
				0.0517417
				0.103483
				0.413934
				0.0517417
				0.0517417
				0.0517417
				0.0517417
				0.0517417
				0.0517417
				0.103483
				0.103483
				0.258709
				0.0517417
				0.103483
				0.0517417
				0.155225
[truncated: 1,229 more rows]
