# Supplementary material for: Molecular dissection of PI3Kβ synergistic activation by receptor tyrosine kinases, GβGγ, and Rho-family GTPases
Source: eLife. 2024 May 7;12:RP88991. doi: 10.7554/eLife.88991 (PMC11076043; doi:10.7554/eLife.88991)
Supplement: Figure 3—figure supplement 1—source data 2. [file elife-88991-fig3-figsupp1-data2.xlsx]

## Sheet: Fig 3 - FS1B
Figure 3 -	Single molecule dwell time distribution
figure supplement 1B
	movie	mov1	mov2		RAW Dwell time (sec)	Bin (sec)	freq	1-CDF
10 nM Dy647-PI3KB	alpha	0.6377	0.6251		0.362192	0	0	1
200 nM GbGg	T1 (sec)	0.04096	0.04354		0.155225	0.052	0.516368	0.483632
plus 10 µM pY solution	T2 (sec)	0.1927	0.2072		0.258709	0.104	0.723996	0.276004
	N	9639	9989		0.155225	0.156	0.797978	0.202022
	AVE DT (sec)	0.127833	0.135832		0.0517417	0.208	0.854039	0.145961
					0.0517417	0.26	0.893082	0.106918
					1.2418	0.312	0.919511	0.0804885
					0.0517417	0.364	0.937231	0.062769
					0.206967	0.416	0.951747	0.0482531
					0.362192	0.468	0.961658	0.0383422
					0.103483	0.52	0.970367	0.0296326
					0.155225	0.572	0.977175	0.0228251
					0.31045	0.624	0.98168	0.0183202
					0.0517417	0.676	0.984783	0.0152167
					0.0517417	0.728	0.987486	0.0125138
					0.103483	0.78	0.989188	0.0108119
					0.155225	0.832	0.99099	0.00900991
					0.0517417	0.884	0.992792	0.00720793
					0.103483	0.936	0.993393	0.00660727
					0.413934	0.988	0.994294	0.00570628
					0.0517417	1.04	0.995095	0.0049054
					0.672643	1.092	0.995295	0.00470518
					0.258709	1.144	0.995595	0.00440485
					0.206967	1.196	0.995895	0.00410451
					0.0517417	1.248	0.996596	0.00340374
					0.0517417	1.3	0.996997	0.0030033
					0.517417	1.352	0.997397	0.00260286
					0.362192	1.404	0.997898	0.00210231
					0.206967	1.456	0.998198	0.00180198
					0.155225	1.508	0.998198	0.00180198
					0.362192	1.56	0.998498	0.00150165
					0.413934	1.612	0.998699	0.00130143
					0.0517417	1.664	0.998999	0.0010011
					1.29354	1.716	0.999099	0.000900991
					0.0517417	1.768	0.999199	0.000800881
					0.0517417	1.82	0.999199	0.000800881
					0.0517417	1.872	0.999299	0.000700771
					0.31045	1.924	0.999299	0.000700771
					0.362192	1.976	0.999499	0.000500551
					0.258709	2.028	0.9996	0.00040044
					1.8627	2.08	0.9996	0.00040044
					0.0517417	2.132	0.9997	0.00030033
					0.258709	2.184	0.9997	0.00030033
					0.0517417	2.236	0.9998	0.00020022
					0.103483	2.288	0.9998	0.00020022
					0.31045	2.34	0.9999	0.00010011
					0.31045	2.392	1	0
					0.0517417	2.444	1	0
					0.0517417	2.496	1	0
					0.103483	2.548	1	0
					0.258709	2.6	1	0
					0.620901	2.652	1	0
					0.724384	2.704	1	0
					0.0517417	2.756	1	0
					0.0517417	2.808	1	0
					0.0517417	2.86	1	0
					0.155225	2.912	1	0
					0.0517417	2.964	1	0
					0.155225	3.016	1	0
					0.0517417	3.068	1	0
					0.103483	3.12	1	0
					0.0517417
					0.103483
					0.0517417
					0.0517417
					0.0517417
					0.0517417
					0.0517417
					0.103483
					0.206967
					0.155225
					0.258709
					0.0517417
					0.31045
					0.206967
					0.0517417
					0.0517417
					0.103483
					0.103483
					0.103483
					0.0517417
					0.31045
					0.0517417
					0.103483
					0.155225
					0.155225
					0.0517417
					0.362192
					0.206967
					0.103483
					0.0517417
					0.0517417
					0.0517417
					0.258709
					0.103483
					0.0517417
					0.258709
					0.206967
					0.103483
					0.103483
					0.206967
					0.103483
					0.827868
					0.155225
					0.155225
					0.103483
					0.362192
					0.0517417
					0.0517417
					0.0517417
					0.0517417
					0.103483
					0.103483
					0.0517417
					0.0517417
					0.103483
					0.103483
					0.103483
					0.103483
					1.44877
					0.0517417
					0.103483
					0.103483
					0.258709
					0.362192
					0.672643
					0.103483
					0.0517417
					0.206967
					0.413934
					0.103483
					0.155225
					0.931351
					0.155225
					0.362192
					0.0517417
					0.413934
					0.983093
					0.465676
					0.0517417
					0.103483
					0.103483
					0.0517417
					0.0517417
					0.0517417
					0.103483
					0.0517417
					0.0517417
					0.103483
					0.0517417
					0.103483
					0.0517417
					0.0517417
					0.0517417
					0.0517417
					0.103483
					0.103483
					0.0517417
					0.0517417
					0.103483
					0.206967
					0.206967
					0.0517417
					0.258709
					0.0517417
					0.155225
					1.29354
					0.0517417
					0.103483
					0.103483
					0.258709
					0.0517417
					0.413934
					0.413934
					0.0517417
					0.0517417
					0.206967
					0.931351
					0.258709
					0.569159
					0.362192
					0.103483
					0.103483
					0.155225
					0.0517417
					0.0517417
					0.0517417
					0.0517417
					0.0517417
					0.0517417
					0.0517417
					0.0517417
					0.0517417
					0.0517417
					0.0517417
					0.0517417
					0.362192
					0.0517417
					0.0517417
					0.465676
					0.258709
					0.465676
					0.0517417
					0.362192
					0.569159
					0.103483
					0.0517417
					0.0517417
					0.413934
					0.258709
					0.31045
					0.103483
					0.0517417
					0.0517417
					0.103483
					0.362192
					0.0517417
					0.0517417
					0.517417
					0.0517417
					0.0517417
					0.0517417
					0.103483
					0.0517417
					0.103483
					0.0517417
					0.362192
					0.103483
					0.103483
					0.0517417
					0.31045
					0.206967
					0.155225
					0.0517417
					0.0517417
					0.0517417
					0.0517417
					0.0517417
					0.0517417
					0.0517417
					0.0517417
					0.0517417
					0.0517417
					0.0517417
					0.0517417
					0.0517417
					0.0517417
					0.103483
					0.103483
					0.103483
					0.206967
					0.517417
					0.0517417
					0.0517417
					0.103483
					0.103483
					0.155225
					0.31045
					0.103483
					0.103483
					0.0517417
					0.0517417
					0.0517417
					0.31045
					0.103483
					0.103483
					0.0517417
					0.0517417
					0.0517417
					0.569159
					0.0517417
					2.12141
					0.0517417
					0.0517417
					0.103483
					0.0517417
					0.155225
					0.0517417
					0.0517417
					0.0517417
					0.258709
					0.206967
					0.413934
					0.0517417
					0.0517417
					0.0517417
					0.0517417
					0.31045
					0.103483
					0.206967
					0.103483
					0.258709
					0.569159
					0.155225
					0.206967
					0.0517417
					0.258709
					0.103483
					0.103483
					0.0517417
					0.0517417
					0.206967
					0.31045
					0.0517417
					0.413934
					0.103483
					0.0517417
					0.103483
					1.39703
					0.103483
					0.155225
					0.0517417
					0.103483
					0.103483
					0.103483
					0.413934
					0.0517417
					0.0517417
					0.517417
					0.103483
					0.31045
					0.517417
					0.0517417
					0.0517417
					0.31045
					0.103483
					0.0517417
					0.0517417
					0.103483
					0.0517417
					0.258709
					0.103483
					0.0517417
					0.0517417
					0.0517417
					0.0517417
					0.0517417
					0.0517417
					0.362192
					0.155225
					0.103483
					0.0517417
					0.103483
					0.0517417
					0.0517417
					0.103483
					0.103483
					0.103483
					0.0517417
					0.0517417
					0.103483
					0.206967
					0.103483
					0.724384
					0.31045
					0.0517417
					0.206967
					0.103483
					0.103483
					0.362192
					0.155225
					0.258709
					0.0517417
					0.0517417
					0.0517417
					0.0517417
					0.31045
					0.0517417
					0.258709
					1.34529
					0.103483
					0.0517417
					0.103483
					0.103483
					0.206967
					0.0517417
					0.0517417
					0.0517417
					0.206967
					0.155225
					0.155225
					0.103483
					0.155225
					0.31045
					0.258709
					0.413934
					0.155225
					0.206967
					0.103483
					0.103483
					0.103483
					0.0517417
					0.31045
					0.0517417
					0.206967
					0.362192
					0.0517417
					0.724384
					0.103483
					0.465676
					0.206967
					0.258709
					0.103483
					0.103483
					0.155225
					0.0517417
					0.155225
					0.0517417
					0.155225
					0.155225
					0.0517417
					0.0517417
					0.0517417
					0.0517417
					0.0517417
					0.0517417
					0.0517417
					0.0517417
					0.0517417
					0.0517417
					0.0517417
					0.0517417
					0.0517417
					0.0517417
					0.0517417
					0.0517417
					0.0517417
					0.0517417
					0.0517417
					0.0517417
					0.0517417
					0.103483
					0.31045
					0.0517417
					0.206967
					0.103483
					0.103483
					0.0517417
					0.103483
					0.31045
					0.0517417
					0.0517417
					0.103483
					0.0517417
					0.413934
					0.0517417
					0.0517417
					0.0517417
					0.0517417
					0.155225
					0.0517417
					0.258709
					0.103483
					0.103483
					0.0517417
					0.517417
					0.103483
					0.206967
					0.103483
					0.0517417
					0.362192
					0.0517417
					0.517417
					0.31045
					0.258709
					0.155225
					0.103483
					0.103483
					0.103483
					0.0517417
					0.258709
					0.0517417
					0.0517417
					0.0517417
					0.0517417
					0.103483
					0.0517417
					0.31045
					0.87961
					0.0517417
					0.103483
					0.0517417
					0.0517417
					0.776126
					0.103483
					0.0517417
					0.620901
					0.155225
					0.0517417
					0.0517417
					0.103483
					0.155225
					0.0517417
					0.0517417
					0.0517417
					0.103483
					0.0517417
					0.0517417
					0.0517417
					0.569159
					0.0517417
					0.155225
					0.206967
					0.0517417
					0.206967
					0.465676
					0.31045
					0.103483
					0.0517417
					0.0517417
					0.0517417
					0.0517417
					0.0517417
					0.0517417
					0.103483
					0.0517417
					0.672643
					0.0517417
					0.0517417
					0.31045
					0.155225
					0.155225
					0.0517417
					0.0517417
					0.0517417
					0.258709
					0.258709
					0.103483
					0.362192
					0.155225
					0.0517417
					0.0517417
					0.362192
					0.0517417
					0.155225
					0.206967
					0.465676
					0.620901
					0.413934
					0.103483
					0.103483
					0.569159
					0.103483
					0.155225
					0.0517417
					0.0517417
					0.0517417
					0.0517417
					0.0517417
					0.155225
					0.103483
					0.103483
					0.413934
					0.0517417
					0.206967
					0.155225
					0.362192
					0.155225
					0.258709
					0.103483
					0.362192
					0.413934
					0.155225
					0.0517417
					0.206967
					0.0517417
					0.362192
					0.206967
					0.155225
					0.155225
					0.155225
					0.0517417
					0.206967
					0.0517417
					0.0517417
					0.103483
					1.34529
					0.0517417
					0.103483
					0.0517417
					0.0517417
					0.0517417
					0.0517417
					0.206967
					0.0517417
					0.206967
					1.2418
					0.103483
					1.03483
					0.0517417
					0.0517417
					0.0517417
					0.0517417
					0.0517417
					0.0517417
					0.0517417
					0.206967
					0.0517417
					0.0517417
					0.0517417
					0.0517417
					0.0517417
					0.0517417
					0.103483
					1.08658
					0.103483
					0.0517417
					0.0517417
					0.0517417
					0.0517417
					0.103483
					0.0517417
					0.0517417
					0.103483
					0.103483
					0.0517417
					0.103483
					0.0517417
					0.0517417
					0.0517417
					0.0517417
					0.0517417
					0.0517417
					0.0517417
					0.0517417
					0.0517417
					0.0517417
					0.0517417
					0.0517417
					0.0517417
					0.0517417
					0.0517417
					0.0517417
					0.0517417
					0.0517417
					0.0517417
					0.0517417
					0.0517417
					0.0517417
					0.0517417
					0.0517417
					0.0517417
					0.0517417
					0.0517417
					0.0517417
					0.0517417
					0.103483
					0.155225
					0.103483
					0.258709
					0.258709
					0.0517417
					0.0517417
					0.155225
					0.206967
					0.569159
					0.0517417
					0.0517417
					0.258709
					0.103483
					0.0517417
					0.0517417
					0.155225
					0.103483
					0.206967
					0.206967
					0.103483
					0.103483
					0.103483
					0.0517417
					0.0517417
					0.0517417
					0.206967
					0.155225
					0.103483
					0.724384
					0.206967
					0.87961
					0.206967
					0.0517417
					0.0517417
					0.0517417
					0.0517417
					0.0517417
					0.0517417
					0.0517417
					0.258709
					0.0517417
					0.0517417
					0.103483
					0.0517417
					0.155225
					0.155225
					0.155225
					0.103483
					0.0517417
					1.03483
					0.0517417
					0.103483
					0.0517417
					0.620901
					0.0517417
					0.0517417
					0.0517417
					0.103483
					0.0517417
					0.103483
					0.0517417
					0.0517417
					0.0517417
					0.103483
					0.0517417
					0.0517417
					0.103483
					0.0517417
					0.0517417
					0.0517417
					0.0517417
					0.0517417
					0.0517417
					0.258709
					0.0517417
					0.31045
					0.155225
					0.0517417
					0.103483
					0.0517417
					0.0517417
					0.0517417
					0.155225
					0.206967
					0.258709
					0.362192
					0.0517417
					0.206967
					0.465676
					0.0517417
					0.103483
					0.155225
					0.103483
					0.103483
					0.0517417
					0.103483
					0.0517417
					0.0517417
					0.0517417
					0.31045
					0.0517417
					0.0517417
					0.206967
					0.0517417
					0.517417
					0.31045
					0.103483
					0.103483
					0.0517417
					0.0517417
					0.103483
					0.0517417
					0.0517417
					0.413934
					0.155225
					0.0517417
					0.155225
					0.103483
					0.258709
					0.31045
					0.258709
					0.103483
					0.206967
					0.0517417
					0.0517417
					0.155225
					0.0517417
					0.0517417
					0.206967
					0.206967
					0.103483
					0.0517417
					0.155225
					0.0517417
					0.103483
					0.258709
					0.103483
					0.0517417
					0.206967
					0.258709
					0.465676
					0.0517417
					0.0517417
					0.155225
					0.0517417
					0.103483
					0.0517417
					0.155225
					0.103483
					0.206967
					0.258709
					0.0517417
					0.0517417
					0.206967
					0.258709
					0.0517417
					0.0517417
					0.0517417
					0.0517417
					0.103483
					0.103483
					0.31045
					0.0517417
					0.0517417
					0.206967
					0.155225
					0.0517417
					0.0517417
					0.0517417
					0.0517417
					0.0517417
					0.0517417
					0.0517417
					0.0517417
					0.0517417
					0.0517417
					0.0517417
					0.0517417
					0.0517417
					0.0517417
					0.31045
					0.206967
					0.103483
					0.103483
					0.0517417
					0.103483
					0.0517417
					0.103483
					1.03483
					0.103483
					0.103483
					0.0517417
					0.0517417
					0.0517417
					0.103483
					0.103483
					0.103483
					0.103483
					0.0517417
					0.0517417
					0.0517417
					0.0517417
					0.103483
					0.103483
					0.0517417
					0.103483
					0.103483
					0.0517417
					0.0517417
					0.0517417
					0.0517417
					0.0517417
					0.0517417
					0.0517417
					0.0517417
					0.103483
					0.0517417
					0.103483
					0.0517417
					0.103483
					0.103483
					0.517417
					0.258709
					0.155225
					0.206967
					0.103483
					0.569159
					0.0517417
					0.362192
					0.103483
					0.103483
					0.0517417
					0.0517417
					0.258709
					0.103483
					0.31045
					0.517417
					0.103483
					0.103483
					0.0517417
					0.0517417
					0.87961
					0.103483
					0.103483
					0.0517417
					0.0517417
					0.103483
					0.31045
					0.362192
					0.413934
					0.0517417
					0.0517417
					0.0517417
					0.0517417
					0.0517417
					0.0517417
					0.0517417
					0.103483
					0.0517417
					0.0517417
					0.155225
					0.0517417
					0.0517417
					0.258709
					0.103483
					0.0517417
					0.0517417
					0.0517417
					0.0517417
					0.0517417
					0.362192
					0.0517417
					0.258709
					0.31045
					0.0517417
					0.0517417
					0.0517417
					0.0517417
					0.155225
					0.31045
					0.206967
					0.103483
					0.0517417
					0.0517417
					0.0517417
					0.0517417
					0.0517417
					0.0517417
					0.0517417
					0.0517417
					0.0517417
					0.0517417
					0.0517417
					0.155225
					0.103483
					0.103483
					0.0517417
					0.258709
					0.413934
					0.155225
					0.776126
					0.103483
					0.0517417
					0.0517417
					0.206967
					0.0517417
					0.0517417
					0.0517417
					0.0517417
					0.362192
					0.103483
					0.0517417
					0.258709
					0.0517417
					0.155225
					0.0517417
					0.103483
					0.155225
					0.155225
					0.103483
					0.0517417
					0.0517417
					0.0517417
					0.0517417
					0.0517417
					0.0517417
					0.0517417
					0.155225
					0.0517417
					0.0517417
					0.0517417
					0.0517417
					0.0517417
					0.0517417
					0.0517417
					0.0517417
					0.0517417
					0.0517417
					0.0517417
					0.0517417
					0.0517417
					0.0517417
					0.0517417
					0.517417
					0.0517417
					0.103483
					0.0517417
					0.0517417
					0.465676
					0.0517417
					0.0517417
					0.103483
					0.0517417
					0.0517417
					0.672643
					0.0517417
					0.103483
					0.155225
					0.0517417
					0.0517417
					0.103483
					0.103483
					0.155225
					0.0517417
					0.0517417
					0.0517417
					0.103483
					0.0517417
					0.0517417
					0.0517417
					0.103483
					0.155225
					0.206967
					0.155225
					0.103483
					0.0517417
					0.155225
					0.0517417
					0.0517417
					0.155225
					0.0517417
					0.206967
					0.103483
					0.103483
					0.103483
					0.0517417
					0.0517417
					0.0517417
					0.0517417
					0.206967
					0.0517417
					0.0517417
					0.0517417
					0.0517417
					0.0517417
					0.31045
					0.103483
					0.0517417
					0.931351
					0.0517417
					0.0517417
					0.0517417
					0.258709
					0.103483
					0.0517417
					0.206967
					0.258709
					0.206967
					0.0517417
					0.0517417
					0.0517417
					0.0517417
					0.0517417
					0.103483
					0.103483
					0.155225
					0.0517417
					0.0517417
					0.0517417
					0.103483
					0.206967
					0.0517417
					0.0517417
					0.0517417
					0.0517417
					0.0517417
					0.0517417
					0.0517417
					0.0517417
					0.0517417
					0.0517417
					0.258709
					0.569159
					0.155225
					0.0517417
					0.517417
					2.01793
					0.103483
					0.155225
					0.155225
					0.465676
					0.827868
					0.0517417
					0.31045
					0.362192
					0.569159
					0.413934
					0.206967
					0.103483
					0.0517417
					0.0517417
					0.0517417
					0.0517417
					0.0517417
					0.0517417
					0.31045
					0.0517417
					0.0517417
					0.206967
					0.103483
					0.0517417
					0.569159
					0.103483
					0.0517417
					0.206967
					0.206967
					0.155225
					0.0517417
					0.0517417
					0.103483
					0.0517417
					0.0517417
					0.362192
					0.103483
					0.0517417
					0.103483
					0.206967
					0.258709
					0.206967
					0.103483
					0.0517417
					0.0517417
					0.0517417
					0.0517417
					0.258709
					0.0517417
					0.0517417
					0.0517417
					0.0517417
					0.0517417
					0.103483
					0.0517417
					0.155225
					0.0517417
					0.103483
					0.103483
					0.103483
					0.103483
					0.0517417
					0.103483
					0.0517417
					0.155225
					0.258709
					0.206967
					0.103483
					0.0517417
					0.0517417
					0.0517417
					0.0517417
					0.0517417
					0.0517417
					0.0517417
					0.0517417
					0.0517417
					0.0517417
					0.0517417
					0.0517417
					0.0517417
					0.0517417
					0.0517417
					0.0517417
					0.0517417
					0.103483
					0.0517417
					0.103483
					0.0517417
					0.0517417
					0.0517417
					0.155225
					0.258709
					0.0517417
					0.103483
					0.155225
					0.0517417
					0.206967
					0.103483
					0.103483
					0.465676
					0.258709
					0.672643
					0.0517417
					0.258709
					0.0517417
					0.0517417
					0.206967
					0.0517417
					0.206967
					0.0517417
					0.103483
					0.0517417
					0.206967
					0.103483
					0.0517417
					0.569159
					0.0517417
					0.0517417
					0.569159
					0.0517417
					0.0517417
					0.155225
					0.0517417
					0.103483
					0.0517417
					0.0517417
					0.0517417
					0.0517417
					0.0517417
					1.2418
					0.0517417
					0.0517417
					0.0517417
					0.0517417
					0.0517417
					0.0517417
					0.0517417
					0.0517417
					0.155225
					0.620901
					0.155225
					0.103483
					0.31045
					0.155225
					0.103483
					0.206967
					0.155225
					0.103483
					0.103483
					0.206967
					0.103483
					0.103483
					0.206967
					0.31045
					0.517417
					0.517417
					0.258709
					0.0517417
					0.103483
					0.0517417
					0.155225
					0.103483
					0.0517417
					0.31045
					0.0517417
					0.31045
					0.0517417
					0.0517417
					0.0517417
					0.0517417
					0.0517417
					0.0517417
					0.103483
					0.103483
					0.103483
					0.103483
					0.0517417
					0.0517417
					0.103483
					0.103483
					0.0517417
					0.0517417
					0.0517417
					0.103483
					0.103483
					0.0517417
					0.0517417
					0.0517417
					0.0517417
					0.0517417
					0.0517417
					0.0517417
					0.0517417
					0.0517417
					0.0517417
					0.0517417
					0.0517417
					0.103483
					0.0517417
					0.155225
					0.31045
					0.103483
					0.413934
					0.0517417
					0.103483
					0.0517417
					0.103483
					0.103483
					0.569159
					0.0517417
					0.724384
					0.776126
					0.103483
					0.103483
					0.103483
					0.362192
					0.0517417
					0.0517417
					0.413934
					0.0517417
					0.31045
					0.206967
					0.0517417
					0.362192
					0.0517417
					0.465676
					0.0517417
					0.0517417
					0.0517417
					0.103483
					0.0517417
					0.103483
					0.0517417
					0.155225
					0.0517417
					0.103483
					0.413934
					0.362192
					0.0517417
					0.155225
					0.206967
					0.103483
					0.0517417
					0.103483
					0.155225
					0.103483
					0.0517417
					0.155225
					0.155225
					0.258709
					0.0517417
					0.103483
					0.206967
					0.0517417
					0.0517417
					0.103483
					0.0517417
					0.0517417
					0.0517417
					0.0517417
					0.31045
					0.0517417
					0.0517417
					0.0517417
					0.0517417
					0.0517417
					0.0517417
					0.0517417
					0.413934
					0.0517417
					0.0517417
					0.0517417
					0.0517417
					0.0517417
					0.0517417
					0.0517417
					0.155225
					0.103483
					0.31045
					0.0517417
					0.0517417
					0.413934
					0.258709
					0.0517417
					0.103483
					0.155225
					0.155225
					0.0517417
					0.517417
					0.827868
					0.0517417
					0.0517417
					0.155225
					0.569159
					0.0517417
					0.155225
					0.206967
					0.0517417
					0.413934
					0.0517417
					0.0517417
					0.0517417
					0.206967
					0.103483
					0.103483
					0.0517417
					0.0517417
					0.31045
					0.0517417
					0.0517417
					0.31045
					0.0517417
					0.0517417
					0.0517417
					0.206967
					0.0517417
					0.0517417
					0.0517417
					0.0517417
					0.0517417
					0.0517417
					0.103483
					0.0517417
					0.31045
					0.103483
					0.103483
					0.103483
					0.155225
					0.103483
					0.103483
					0.103483
					0.0517417
					0.206967
					0.258709
					0.155225
					0.0517417
					0.0517417
					0.258709
					0.362192
					0.258709
					0.103483
					0.258709
					0.0517417
					0.0517417
					0.0517417
					0.87961
					0.0517417
					0.155225
					0.465676
					0.103483
					0.155225
					0.103483
					0.155225
					0.103483
					0.206967
					0.0517417
					0.0517417
					0.0517417
					0.103483
					0.103483
					0.103483
					0.206967
					0.413934
					0.103483
					0.0517417
					0.155225
					0.103483
					0.31045
					0.0517417
					0.0517417
					0.0517417
					0.0517417
					0.0517417
					0.0517417
					0.155225
					0.0517417
					0.206967
					0.0517417
					0.0517417
					0.0517417
					0.31045
					0.0517417
					0.0517417
					0.0517417
					0.0517417
					0.103483
					0.0517417
					0.103483
					0.103483
					0.0517417
					0.0517417
					0.31045
					0.724384
					0.155225
					0.103483
					0.0517417
					0.0517417
					0.0517417
					0.103483
					0.155225
					0.0517417
					0.0517417
					0.0517417
					0.0517417
					0.0517417
					0.0517417
					0.827868
					0.155225
					0.0517417
					0.0517417
					0.0517417
					0.103483
					0.103483
					0.155225
					0.0517417
					0.0517417
					0.0517417
					0.0517417
					0.0517417
					0.0517417
					0.0517417
					0.0517417
					0.465676
					0.0517417
					0.724384
					0.0517417
					0.0517417
					0.362192
					0.103483
					0.0517417
					0.103483
					0.0517417
					0.0517417
					0.0517417
					0.0517417
					0.0517417
					0.0517417
					0.0517417
					0.103483
					0.206967
					0.0517417
					0.0517417
					0.0517417
					0.465676
					0.0517417
					0.0517417
					0.103483
					0.0517417
					0.0517417
					0.103483
					0.103483
					0.103483
					0.103483
					0.103483
					0.155225
					0.103483
					0.103483
					0.0517417
					0.0517417
					0.0517417
					0.0517417
					0.103483
					0.0517417
					0.0517417
					0.258709
					0.0517417
					0.0517417
					0.0517417
					0.0517417
					0.0517417
					0.0517417
					0.0517417
					0.103483
					0.155225
					0.103483
					0.155225
					0.0517417
					0.103483
					0.0517417
					0.0517417
					0.155225
					0.0517417
					0.103483
					0.31045
					0.206967
					0.0517417
					0.103483
					0.0517417
					0.103483
					0.258709
					0.206967
					0.258709
					0.0517417
					0.0517417
					0.103483
					0.0517417
					0.0517417
					0.0517417
					0.0517417
					0.206967
					0.0517417
					0.206967
					0.103483
					0.0517417
					0.0517417
					0.569159
					0.155225
					0.0517417
					0.103483
					0.0517417
					0.0517417
					0.0517417
					0.0517417
					0.0517417
					0.0517417
					0.0517417
					0.0517417
					0.0517417
					0.0517417
					0.0517417
					0.0517417
					0.103483
					0.155225
					0.206967
					0.155225
					0.87961
					0.362192
					0.0517417
					0.103483
					0.103483
					0.620901
					0.103483
					0.0517417
					0.0517417
					0.103483
					0.155225
					0.31045
					0.103483
					0.983093
					0.465676
					0.0517417
					0.103483
					0.155225
					0.103483
					0.103483
					0.103483
					0.0517417
					0.206967
					0.103483
					0.206967
					0.155225
					0.0517417
					0.0517417
					0.0517417
					0.0517417
					0.0517417
					0.0517417
					0.0517417
					0.0517417
					0.0517417
					0.103483
					0.103483
					0.0517417
					0.103483
					0.0517417
					0.0517417
					0.0517417
					0.103483
					0.0517417
					0.569159
					0.103483
					0.0517417
					0.103483
					0.258709
					0.155225
					0.0517417
					0.206967
					0.0517417
					0.0517417
					0.103483
					0.103483
					0.206967
					0.0517417
					0.0517417
					0.155225
					0.31045
					0.0517417
					0.0517417
					0.258709
					0.0517417
					0.0517417
					0.0517417
					0.0517417
					0.0517417
					0.0517417
					0.0517417
					0.413934
					0.103483
					0.155225
					0.0517417
					0.0517417
					0.103483
					0.0517417
					0.103483
					0.0517417
					0.0517417
					0.103483
					0.258709
					0.103483
					0.258709
					0.155225
					0.206967
					0.258709
					0.0517417
					0.0517417
					0.0517417
					0.0517417
					0.0517417
					0.0517417
					0.0517417
					0.413934
					0.0517417
					0.0517417
					0.0517417
					0.0517417
					0.0517417
					0.0517417
					0.0517417
					0.155225
					0.0517417
					0.0517417
					0.0517417
					0.0517417
					0.87961
					0.413934
					0.103483
					0.155225
					0.155225
					0.103483
					0.0517417
					0.206967
					0.0517417
					0.103483
					0.620901
					0.103483
					0.0517417
					0.155225
					0.0517417
					0.0517417
					0.0517417
					0.103483
					0.0517417
					0.0517417
					0.569159
					0.0517417
					0.155225
					0.103483
					0.103483
					0.0517417
					0.206967
					0.0517417
					0.465676
					0.0517417
					0.413934
					0.0517417
					0.0517417
					0.103483
					0.103483
					0.31045
					0.0517417
					0.0517417
					0.620901
					0.0517417
					0.258709
					0.0517417
					0.413934
					0.155225
					0.362192
					0.206967
					0.103483
					0.103483
					0.155225
					0.0517417
					0.31045
					0.0517417
					0.155225
					0.206967
					0.0517417
					0.0517417
					0.103483
					0.258709
					0.155225
					0.413934
					0.465676
					0.206967
					0.0517417
					0.0517417
					0.0517417
					0.0517417
					0.0517417
					0.0517417
					0.0517417
					0.0517417
					0.0517417
					0.0517417
					0.0517417
					0.0517417
					0.0517417
					0.0517417
					0.0517417
					0.0517417
					0.0517417
					0.0517417
					0.0517417
					0.0517417
					0.0517417
					0.0517417
					0.0517417
					0.0517417
					0.0517417
					0.0517417
					0.0517417
					0.155225
					0.0517417
					0.206967
					0.31045
					0.0517417
					0.155225
					0.413934
					0.206967
					0.0517417
					0.103483
					0.0517417
					0.206967
					0.0517417
					0.103483
					0.517417
					0.0517417
					0.103483
					0.0517417
					0.0517417
					0.155225
					0.0517417
					0.0517417
					0.0517417
					0.103483
					0.155225
					0.0517417
					0.0517417
					0.103483
					0.465676
					0.362192
					0.103483
					0.103483
					0.0517417
					0.155225
					0.258709
					0.103483
					0.103483
					0.0517417
					0.0517417
					0.0517417
					0.155225
					0.672643
					0.103483
					0.103483
					0.0517417
					0.103483
					0.362192
					0.155225
					0.103483
					0.0517417
					0.103483
					0.620901
					0.103483
					0.103483
					0.0517417
					0.0517417
					0.0517417
					0.206967
					0.103483
					0.103483
					0.103483
					0.206967
					0.258709
					0.258709
					0.258709
					0.0517417
					0.155225
					0.0517417
					0.0517417
					0.724384
					0.155225
					0.103483
					0.413934
					0.0517417
					0.206967
					0.103483
					0.31045
					0.0517417
					0.103483
					0.155225
					0.206967
					0.0517417
					0.0517417
					0.155225
					0.0517417
					0.103483
					0.103483
					0.206967
					0.258709
					0.0517417
					0.206967
					0.569159
					0.0517417
					0.103483
					0.103483
					0.0517417
					0.0517417
					0.0517417
					0.0517417
					0.517417
					0.0517417
					0.0517417
					0.0517417
					0.0517417
					0.724384
					0.0517417
					0.103483
					0.103483
					1.96619
					0.103483
					0.0517417
					0.206967
					0.0517417
					0.0517417
					0.206967
					0.155225
					0.0517417
					0.258709
					0.103483
					0.206967
					0.0517417
					0.827868
					0.362192
					0.103483
					0.206967
					0.31045
					0.206967
					0.517417
					0.103483
					0.103483
					0.103483
					0.155225
					0.103483
					0.0517417
					0.0517417
					0.0517417
					0.0517417
					0.0517417
					0.0517417
					0.0517417
					0.0517417
					0.0517417
					0.0517417
					0.0517417
					0.0517417
					0.0517417
					0.0517417
					0.0517417
					0.0517417
					0.0517417
					0.0517417
					0.103483
					0.103483
					0.103483
					0.258709
					0.0517417
					0.0517417
					0.155225
					0.103483
					0.0517417
					0.206967
					0.206967
					0.206967
					0.620901
					0.0517417
					0.0517417
					0.103483
					0.362192
					0.0517417
					0.0517417
					0.517417
					0.258709
					0.569159
					0.155225
					0.0517417
					0.465676
					0.206967
					0.155225
					0.206967
					0.0517417
					0.258709
					0.0517417
					0.413934
					0.206967
					0.0517417
					0.0517417
					0.155225
					0.0517417
					0.362192
					0.103483
[truncated: 7,992 more rows]
