# Supplementary material for: Molecular dissection of PI3Kβ synergistic activation by receptor tyrosine kinases, GβGγ, and Rho-family GTPases
Source: eLife. 2024 May 7;12:RP88991. doi: 10.7554/eLife.88991 (PMC11076043; doi:10.7554/eLife.88991)
Supplement: Figure 3—figure supplement 1—source data 3. [file elife-88991-fig3-figsupp1-data3.xlsx]

## Sheet: Fig 3 - FS1D
Figure 3 -	Synergistic membrane recruitment of Dy647-3KB mediated by pY and GbGg
figure supplement 1D	Membrane composition: 76% DOPC, 20% DOPS, 2% PI(4,5)P2, 2% MCC-PE
	signal represents baseline corrected membrane intensity of Dy647-3KB
	time (sec)	pY(soln)	GbGg	pY(soln),GbGg
	0	0	0	0
	10	36.621	42.961	349.675
	20	42.931	39.211	801.924
	30	42.233	43.495	1156.66
	40	48.717	44.351	1404.75
	50	51.53	46.341	1736.54
	60	60.624	51.568	1890.76
	70	59.59	56.638	2095.11
	80	58.476	60.588	2257.32
	90	57.004	62.873	2468.84
	100	55.529	67.957	2549.56
	110	56.953	67.656	2737.64
	120	66.304	56.892	2788.48
	130	58.856	76.982	2892.37
	140	64.499	66.684	3014.09
	150	70.683	69.81	3109.15
	160.001	58.071	63.772	3180.63
	170.001	63.082	65.686	3138.49
	180.001	60.991	70.34	3247.69
	190.001	62.239	76.234	3434.64
	200.001	66.266	69.156	3451.68
	210.001	66.009	76.553	3544.6
	220.001	66.461	83.915	3646.02
	230.001	65.613	83.141	3719.16
	240.001	73.54	87.255	3681.7
	250.001	76.084	79.031	3723.03
	260.001	78.968	86.267	3829.19
	270.001	73.92	85.387	3935.6
	280.001	73.394	84.251	3959.06
	290.001	76.452	77.82	3957.68
	300.001	77.567	84.798	3958.1
	310.001	72.372	81.648	3986.73
	320.001	75.38	78.811	3983.19
	330.001	86.549	92.193	4064.55
	340.001	91.701	94.221	4067.39
	350.001	83.786	104.092	4048.83
	360.001	85.592	109.587	4094.72
	370.001	84.776	113.195	4127.76
	380.001	85.324	108.105	4241.53
	390.001	87.19	94.185	4317.61
	400.001	86.928	96.03	4388.16
	410.001	91.991	105.334	4394.77
	420.001	92.962	110.898	4465.06
	430.001	92.292	245.481	4418.11
	440.001	99.469	199.761	4497.23
	450.001	98.077	202.265	4546.52
	460.001	101.994	138.794	4512.08
	470.002	100.688	141.163	4495.88
	480.002	100.641	120.272	4596.65
	490.002	102.87	108.754	4628.07
	500.002	105.144	110.458	4697.88
