# Supplementary material for: Molecular dissection of PI3Kβ synergistic activation by receptor tyrosine kinases, GβGγ, and Rho-family GTPases
Source: eLife. 2024 May 7;12:RP88991. doi: 10.7554/eLife.88991 (PMC11076043; doi:10.7554/eLife.88991)
Supplement: Figure 5—figure supplement 1—source data 1. [file elife-88991-fig5-figsupp1-data1.xlsx]

## Sheet: Fig 5 - FS1B
Figure 5 -	Single molecule dwell time distribution
figure supplement 1B
	25 pM Btk-SNAP-AF488				50 pM Grp1-AF555
	RAW Dwell time (sec)	Bin (sec)	freq		RAW Dwell time (sec)	Bin (sec)	freq
	0.0517417	0.104	0.654471		0.31045	0.104	0.863924
	0.103483	0.156	0.45591		0.517417	0.156	0.778481
	0.206967	0.208	0.314286		0.258709	0.208	0.690823
	0.103483	0.26	0.214183		0.258709	0.26	0.615823
	0.155225	0.312	0.148818		0.31045	0.312	0.552848
	0.206967	0.364	0.11038		0.31045	0.364	0.488608
	0.103483	0.416	0.0795478		0.776126	0.416	0.442722
	0.0517417	0.468	0.0631038		0.31045	0.468	0.401899
	0.0517417	0.52	0.0487153		0.155225	0.52	0.363608
	0.258709	0.572	0.0363823		0.827868	0.572	0.331962
	0.362192	0.624	0.0304214		2.53535	0.624	0.301266
	0.413934	0.676	0.0271326		0.103483	0.676	0.273101
	0.206967	0.728	0.0230216		0.362192	0.728	0.247152
	0.155225	0.78	0.0180884		2.01793	0.78	0.223101
	0.0517417	0.832	0.0152107		0.155225	0.832	0.20538
	0.517417	0.884	0.0127441		0.103483	0.884	0.187658
	0.206967	0.936	0.0106886		0.206967	0.936	0.166139
	0.103483	0.988	0.00904419		0.362192	0.988	0.151266
	0.155225	1.04	0.00801644		0.827868	1.04	0.138608
	0.0517417	1.092	0.00739979		0.620901	1.092	0.123101
	0.155225	1.144	0.00698869		0.155225	1.144	0.114557
	0.258709	1.196	0.00637205		1.03483	1.196	0.106329
	0.155225	1.248	0.00637205		0.258709	1.248	0.0990506
	0.258709	1.3	0.0061665		0.0517417	1.3	0.0920886
	0.0517417	1.352	0.0057554		0.155225	1.352	0.0838608
	0.103483	1.404	0.0053443		0.0517417	1.404	0.0791139
	0.0517417	1.456	0.00472765		1.19006	1.456	0.0708861
	0.206967	1.508	0.0045221		0.103483	1.508	0.0651899
	0.103483	1.56	0.0045221		0.155225	1.56	0.0594937
	0.155225	1.612	0.0036999		0.413934	1.612	0.0556962
	0.31045	1.664	0.00349435		3.00102	1.664	0.0518987
	0.103483	1.716	0.0032888		0.103483	1.716	0.0481013
	0.103483	1.768	0.00308325		0.258709	1.768	0.0455696
	0.103483	1.82	0.00267215		0.983093	1.82	0.0436709
	0.258709	1.872	0.0024666		0.827868	1.872	0.0411392
	0.362192	1.924	0.00226105		0.362192	1.924	0.0370253
	0.258709	1.976	0.0020555		2.38012	1.976	0.0348101
	0.155225	2.028	0.00184995		0.155225	2.028	0.0332278
	0.258709	2.08	0.00184995		0.103483	2.08	0.0313291
	0.206967	2.132	0.00184995		3.25973	2.132	0.0287975
	0.103483	2.184	0.0016444		0.931351	2.184	0.0272152
	0.155225	2.236	0.0016444		0.362192	2.236	0.0259494
	0.0517417	2.288	0.0016444		0.362192	2.288	0.025
	0.206967	2.34	0.00143885		0.620901	2.34	0.0227848
	0.206967	2.392	0.000822199		0.31045	2.392	0.0218354
	0.155225	2.444	0.00020555		0.672643	2.444	0.0205696
	0.0517417	2.496	0		0.0517417	2.496	0.0193038
	0.517417				3.62192	2.548	0.0177215
	0.155225				0.569159	2.6	0.0161392
	0.0517417				1.13832	2.652	0.0148734
	0.0517417				0.569159	2.704	0.0139241
	0.0517417				0.103483	2.756	0.0136076
	0.0517417				0.103483	2.808	0.0126582
	0.0517417				0.465676	2.86	0.0126582
	0.206967				0.31045	2.912	0.0120253
	0.0517417				0.362192	2.964	0.0107595
	0.0517417				0.413934	3.016	0.010443
	0.155225				1.08658	3.068	0.00981013
	0.0517417				0.0517417	3.12	0.00949367
	0.206967				0.0517417	3.172	0.0085443
	0.0517417				0.0517417	3.224	0.00822785
	0.103483				0.103483	3.276	0.00759494
	0.103483				0.206967	3.328	0.00664557
	0.0517417				0.0517417	3.38	0.00632911
	0.0517417				0.0517417	3.432	0.00632911
	0.362192				0.620901	3.484	0.00632911
	0.0517417				0.31045	3.536	0.0056962
	0.0517417				0.103483	3.588	0.0056962
	0.103483				0.827868	3.64	0.00537975
	0.155225				1.34529	3.692	0.00474684
	0.206967				0.362192	3.744	0.00474684
	0.103483				0.672643	3.796	0.00411392
	0.0517417				2.4836	3.848	0.00411392
	0.0517417				0.931351	3.9	0.00379747
	0.0517417				2.22489	3.952	0.00316456
	0.413934				0.258709	4.004	0.00316456
	0.103483				0.0517417	4.056	0.00253165
	0.0517417				0.258709	4.108	0.00253165
	0.31045				0.362192	4.16	0.00253165
	0.155225				0.103483	4.212	0.00253165
	0.517417				0.206967	4.264	0.00253165
	0.0517417				1.44877	4.316	0.00253165
	0.103483				0.258709	4.368	0.00221519
	0.465676				0.155225	4.42	0.00221519
	0.155225				0.103483	4.472	0.00221519
	0.0517417				0.672643	4.524	0.00221519
	0.258709				0.206967	4.576	0.00221519
	0.31045				2.06967	4.628	0.00221519
	0.103483				0.0517417	4.68	0.00221519
	0.0517417				0.776126	4.732	0.00221519
	0.103483				0.672643	4.784	0.00189873
	0.206967				1.29354	4.836	0.00189873
	0.103483				0.155225	4.888	0.00158228
	0.103483				0.0517417	4.94	0.00158228
	0.206967				0.206967	4.992	0.00158228
	0.103483				0.103483	5.044	0.00158228
	0.155225				1.65574	5.096	0.00158228
	0.362192				0.206967	5.148	0.00158228
	0.103483				1.81096	5.2	0.00126582
	0.155225				1.29354	5.252	0.00126582
	0.103483				0.517417	5.304	0.000949367
	0.103483				0.31045	5.356	0.000949367
	0.0517417				0.31045	5.408	0.000949367
	0.0517417				0.413934	5.46	0.000949367
	0.0517417				0.0517417	5.512	0.000949367
	0.155225				0.103483	5.564	0.000949367
	0.206967				0.0517417	5.616	0.000949367
	0.0517417				0.827868	5.668	0.000949367
	0.258709				1.08658	5.72	0.000949367
	0.413934				0.620901	5.772	0.000949367
	0.206967				0.103483	5.824	0.000949367
	0.155225				0.258709	5.876	0.000949367
	0.206967				0.31045	5.928	0.000632911
	0.258709				0.931351	5.98	0.000632911
	0.155225				0.103483	6.032	0.000632911
	0.465676				0.258709	6.084	0.000632911
	0.206967				2.4836	6.136	0.000632911
	0.258709				0.465676	6.188	0.000632911
	0.0517417				0.155225	6.24	0.000632911
	0.0517417				0.155225	6.292	0.000632911
	0.0517417				1.19006	6.344	0.000316456
	0.103483				1.13832	6.396	0.000316456
	0.0517417				0.155225	6.448	0.000316456
	0.0517417				0.362192	6.5	0.000316456
	0.0517417				0.0517417	6.552	0.000316456
	0.0517417				0.206967	6.604	0
	0.0517417				0.103483
	0.206967				0.31045
	0.103483				0.569159
	0.155225				0.31045
	0.258709				0.155225
	0.258709				0.724384
	0.362192				0.362192
	0.103483				1.19006
	0.258709				0.413934
	0.206967				0.206967
	0.155225				0.776126
	2.32838				0.672643
	0.206967				0.103483
	0.155225				0.155225
	0.103483				0.103483
	0.103483				1.50051
	0.0517417				2.12141
	0.103483				0.0517417
	0.0517417				1.08658
	0.87961				0.206967
	0.155225				0.206967
	0.672643				0.206967
	0.569159				0.206967
	0.465676				0.0517417
	0.465676				0.465676
	0.155225				0.465676
	0.0517417				0.362192
	0.155225				0.569159
	0.0517417				2.22489
	0.0517417				0.413934
	0.362192				1.29354
	0.103483				0.0517417
	0.258709				0.983093
	0.155225				0.620901
	0.155225				0.724384
	0.103483				1.29354
	0.103483				0.0517417
	0.206967				0.155225
	1.34529				0.258709
	0.413934				1.08658
	0.31045				0.206967
	0.0517417				0.206967
	0.155225				0.362192
	0.155225				0.413934
	0.103483				1.8627
	0.206967				0.258709
	0.0517417				0.931351
	0.155225				1.96619
	0.206967				0.258709
	0.155225				0.517417
	0.31045				0.258709
	0.103483				0.0517417
	0.103483				0.206967
	0.258709				0.983093
	0.103483				1.39703
	0.31045				0.103483
	0.0517417				0.569159
	0.0517417				0.517417
	0.155225				0.103483
	0.0517417				0.155225
	0.931351				0.724384
	0.155225				0.258709
	0.31045				0.155225
	0.103483				0.258709
	0.103483				0.413934
	0.103483				0.31045
	0.0517417				0.87961
	0.103483				0.931351
	0.155225				1.29354
	0.0517417				0.258709
	0.103483				0.103483
	0.206967				0.0517417
	0.103483				0.0517417
	0.258709				0.517417
	0.0517417				1.60399
	0.31045				0.258709
	0.413934				0.413934
	0.258709				0.206967
	0.155225				0.155225
	0.103483				0.155225
	0.0517417				0.0517417
	0.0517417				0.0517417
	0.0517417				0.0517417
	0.0517417				0.0517417
	0.103483				0.0517417
	0.103483				0.0517417
	0.31045				1.13832
	0.155225				1.13832
	0.103483				1.08658
	0.155225				0.517417
	0.0517417				0.724384
	0.155225				1.70748
	0.0517417				0.362192
	0.0517417				0.362192
	0.0517417				0.724384
	0.0517417				0.31045
	0.155225				0.465676
	0.103483				0.155225
	0.0517417				0.517417
	0.258709				1.8627
	0.31045				2.27664
	0.0517417				0.87961
	0.31045				0.724384
	0.31045				1.60399
	0.103483				1.60399
	0.0517417				0.31045
	0.31045				1.96619
	0.258709				0.258709
	0.776126				1.39703
	0.258709				0.0517417
	0.206967				0.103483
	0.258709				0.362192
	0.0517417				0.0517417
	0.103483				0.155225
	0.258709				0.155225
	0.827868				0.465676
	0.465676				1.34529
	0.103483				1.08658
	0.155225				0.517417
	0.206967				0.776126
	0.0517417				0.155225
	0.258709				0.413934
	0.103483				0.155225
	0.103483				0.155225
	0.103483				1.08658
	0.31045				1.44877
	0.206967				0.206967
	0.0517417				0.0517417
	0.0517417				0.776126
	0.258709				0.517417
	0.258709				0.258709
	0.31045				0.155225
	0.103483				0.31045
	0.103483				1.75922
	0.103483				0.569159
	0.103483				1.19006
	0.0517417				1.65574
	0.103483				0.827868
	0.87961				0.206967
	0.103483				0.413934
	0.206967				0.413934
	0.0517417				0.155225
	0.0517417				0.103483
	0.206967				0.103483
	0.103483				0.724384
	0.0517417				1.08658
	0.103483				0.103483
	0.0517417				0.672643
	0.0517417				0.362192
	0.103483				0.465676
	0.258709				0.517417
	0.206967				0.258709
	0.103483				0.103483
	0.206967				0.206967
	0.155225				0.258709
	1.13832				0.103483
	0.155225				2.27664
	0.155225				0.87961
	0.206967				0.31045
	0.0517417				0.103483
	0.155225				0.103483
	0.0517417				1.39703
	0.155225				0.206967
	0.465676				0.258709
	0.155225				0.206967
	0.103483				0.0517417
	0.258709				0.620901
	0.0517417				0.103483
	0.103483				0.0517417
	0.983093				0.983093
	0.0517417				2.63883
	0.103483				0.206967
	0.103483				0.776126
	0.0517417				0.155225
	0.620901				0.31045
	0.103483				0.258709
	0.103483				0.0517417
	0.0517417				0.724384
	0.0517417				0.776126
	0.0517417				0.0517417
	0.0517417				0.0517417
	0.0517417				0.827868
	0.0517417				0.413934
	0.0517417				0.258709
	0.155225				0.206967
	0.362192				0.206967
	0.258709				0.0517417
	0.155225				0.776126
	0.103483				0.465676
	0.155225				0.206967
	0.0517417				0.465676
	0.258709				1.91444
	0.103483				0.31045
	0.0517417				0.103483
	0.103483				0.0517417
	0.206967				2.17315
	0.206967				0.258709
	0.0517417				0.206967
	0.0517417				0.517417
	0.0517417				0.569159
	0.0517417				0.103483
	0.155225				0.0517417
	0.0517417				0.155225
	0.258709				0.258709
	0.0517417				4.03586
	0.206967				1.08658
	0.103483				0.465676
	0.103483				0.0517417
	0.103483				1.13832
	0.0517417				0.465676
	0.0517417				1.13832
	0.0517417				0.465676
	0.103483				0.87961
	0.103483				0.0517417
	0.724384				0.206967
	0.413934				0.103483
	0.206967				2.43186
	0.0517417				0.362192
	0.0517417				0.0517417
	0.103483				0.827868
	0.0517417				0.931351
	0.0517417				0.413934
	0.258709				0.413934
	0.362192				0.983093
	0.776126				0.258709
	0.155225				0.258709
	0.0517417				0.362192
	0.206967				0.413934
	0.31045				0.672643
	0.258709				0.0517417
	0.206967				0.0517417
	0.672643				0.362192
	0.0517417				0.206967
	0.465676				0.103483
	0.206967				0.103483
	0.103483				0.206967
	0.569159				0.103483
	0.413934				0.103483
	0.776126				0.206967
	0.413934				0.620901
	0.103483				0.31045
	0.206967				0.103483
	0.0517417				2.06967
	0.155225				0.87961
	0.0517417				0.155225
	0.155225				1.34529
	0.103483				0.155225
	0.103483				0.827868
	0.103483				1.03483
	0.103483				0.31045
	0.155225				0.258709
	0.155225				0.672643
	0.155225				0.413934
	0.103483				0.103483
	0.103483				0.517417
	0.258709				0.0517417
	0.0517417				0.0517417
	0.0517417				0.87961
	0.103483				0.517417
	0.0517417				0.0517417
	0.0517417				1.19006
	0.103483				0.620901
	0.258709				0.672643
	0.103483				0.362192
	0.103483				0.103483
	0.103483				0.31045
	0.155225				0.31045
	0.258709				0.569159
	0.0517417				0.155225
	0.0517417				0.517417
	0.103483				0.206967
	0.0517417				0.362192
	0.0517417				0.0517417
	0.0517417				0.0517417
	0.0517417				0.517417
	0.0517417				0.103483
	0.103483				0.155225
	0.155225				0.362192
	0.206967				0.620901
	0.206967				0.724384
	0.931351				2.32838
	0.155225				0.258709
	0.103483				0.31045
	0.258709				0.258709
	0.103483				0.0517417
	0.258709				1.50051
	0.31045				0.517417
	0.258709				0.0517417
	0.155225				0.155225
	0.103483				2.79405
	0.0517417				0.465676
	0.103483				0.362192
	0.0517417				0.0517417
	0.0517417				0.206967
	0.0517417				0.0517417
	0.0517417				1.60399
	0.413934				0.31045
	0.103483				0.569159
	0.103483				0.103483
	1.50051				0.362192
	0.206967				0.103483
	0.103483				0.0517417
	0.0517417				0.362192
	0.155225				0.0517417
	0.517417				0.155225
	0.206967				0.155225
	0.155225				0.362192
	0.31045				0.465676
	0.206967				0.827868
	0.103483				2.79405
	0.103483				0.258709
	0.0517417				0.362192
	0.103483				5.3294
	0.0517417				0.465676
	0.258709				0.827868
	0.0517417				0.620901
	0.0517417				0.206967
	0.0517417				0.0517417
	0.0517417				0.362192
	0.0517417				1.03483
	0.0517417				0.258709
	0.413934				0.103483
	0.155225				0.258709
	0.258709				0.517417
	0.155225				1.34529
	0.155225				0.103483
	0.103483				0.31045
	0.827868				0.931351
	0.258709				0.724384
	0.206967				0.362192
	0.155225				0.413934
	0.0517417				0.983093
	0.155225				0.569159
	0.206967				0.362192
	0.258709				0.103483
	2.4836				0.620901
	0.206967				0.103483
	0.258709				0.206967
	0.0517417				0.413934
	0.31045				0.0517417
	0.413934				0.0517417
	0.258709				0.620901
	0.362192				1.2418
	0.0517417				0.0517417
	0.31045				0.155225
	0.362192				0.103483
	0.155225				0.155225
	0.776126				0.206967
	0.155225				0.0517417
	0.0517417				0.258709
	0.0517417				0.87961
	0.0517417				0.103483
	0.0517417				0.362192
	0.155225				2.06967
	0.0517417				0.724384
	0.103483				0.103483
	0.0517417				1.55225
	0.103483				0.31045
	0.155225				0.827868
	0.206967				0.103483
	0.0517417				0.0517417
	0.103483				0.0517417
	0.0517417				0.258709
	0.362192				0.362192
	0.0517417				0.569159
	0.103483				1.65574
	0.672643				0.258709
	0.206967				0.465676
	0.103483				0.362192
	0.155225				0.672643
	0.0517417				0.31045
	0.0517417				0.258709
	0.0517417				0.0517417
	0.155225				0.362192
	0.0517417				0.465676
	0.206967				0.827868
	0.0517417				0.413934
	0.0517417				0.517417
	0.206967				2.94928
	0.362192				0.206967
	0.155225				0.206967
	0.103483				0.0517417
	0.0517417				0.0517417
	0.103483				1.19006
	0.103483				0.206967
	0.155225				0.103483
	0.155225				0.206967
	0.206967				0.983093
	0.258709				0.258709
	0.0517417				0.103483
	0.206967				1.81096
	0.31045				0.776126
	0.0517417				0.31045
	0.0517417				0.0517417
	0.0517417				0.0517417
	0.103483				0.413934
	0.0517417				0.258709
	0.0517417				2.32838
	0.103483				0.103483
	0.258709				0.931351
	0.155225				1.39703
	0.155225				0.465676
	0.0517417				0.465676
	0.569159				1.50051
	0.0517417				0.724384
	0.103483				0.0517417
	0.155225				0.0517417
	0.0517417				0.465676
	0.0517417				0.206967
	0.0517417				0.103483
	0.0517417				0.983093
	0.103483				0.31045
	0.362192				0.206967
	0.103483				0.724384
	0.155225				1.91444
	0.413934				0.258709
	0.31045				0.0517417
	0.0517417				0.206967
	0.0517417				0.0517417
	0.0517417				0.0517417
	0.206967				1.91444
	0.103483				0.0517417
	0.155225				0.206967
	0.155225				0.31045
	0.103483				0.0517417
	0.0517417				0.517417
	0.0517417				0.931351
	0.103483				0.155225
	0.103483				0.827868
	0.103483				0.776126
	0.0517417				0.31045
	0.103483				0.103483
	0.155225				0.362192
	0.103483				1.08658
	0.103483				0.620901
	0.0517417				1.08658
	0.155225				0.206967
	0.258709				1.34529
	0.206967				0.103483
	0.0517417				0.155225
	0.0517417				0.0517417
	0.0517417				0.0517417
	0.0517417				0.0517417
	0.983093				0.931351
	0.103483				0.31045
	0.0517417				0.206967
	0.103483				0.413934
	0.155225				0.0517417
	0.31045				0.0517417
	0.155225				0.103483
	0.258709				0.672643
	0.31045				0.258709
	0.103483				1.70748
	0.258709				0.206967
	0.206967				0.206967
	0.258709				0.258709
	0.0517417				0.206967
	0.0517417				0.465676
	0.0517417				0.362192
	0.0517417				0.155225
	0.155225				0.724384
	0.569159				0.0517417
	0.0517417				0.362192
	0.0517417				0.103483
	0.206967				0.362192
	0.0517417				0.31045
	0.103483				0.31045
	0.103483				0.569159
	0.0517417				1.08658
	0.103483				1.29354
	0.206967				0.206967
	0.155225				0.0517417
	0.103483				0.103483
	0.0517417				0.0517417
	0.0517417				0.465676
	0.0517417				4.76024
	0.0517417				0.620901
	0.0517417				0.0517417
	0.0517417				0.87961
	0.0517417				0.155225
	0.0517417				0.517417
	0.0517417				0.517417
	0.0517417				0.931351
	0.258709				0.206967
	0.155225				0.31045
	0.258709				1.60399
	0.31045				0.362192
	0.258709				0.103483
	0.413934				0.827868
	0.206967				0.931351
	0.413934				1.08658
	0.31045				0.0517417
	0.155225				0.0517417
	0.0517417				0.569159
	0.258709				0.103483
	0.0517417				2.58709
	0.31045				0.620901
	0.0517417				0.258709
	0.827868				0.620901
	0.103483				0.413934
	0.155225				0.87961
	0.0517417				0.620901
	0.0517417				0.258709
	0.206967				1.19006
	0.0517417				0.103483
	0.155225				0.103483
	0.103483				0.155225
	0.155225				0.31045
	0.31045				0.0517417
	0.31045				1.44877
	0.258709				0.465676
	0.206967				0.776126
	0.0517417				0.517417
	0.0517417				0.724384
	0.103483				0.362192
	0.206967				0.465676
	0.103483				1.60399
	0.569159				0.87961
	0.155225				0.206967
	0.103483				1.2418
	0.206967				0.0517417
	0.569159				1.08658
	0.31045				0.206967
	0.103483				0.827868
	0.103483				0.0517417
	0.155225				0.620901
	0.258709				0.413934
	0.206967				0.206967
	0.31045				0.413934
	0.206967				2.58709
	0.258709				0.724384
	0.206967				0.0517417
	0.465676				0.103483
	0.0517417				0.258709
	0.31045				0.103483
	0.0517417				0.517417
	0.206967				1.65574
	0.103483				0.465676
	0.0517417				0.206967
	0.0517417				0.258709
	0.103483				0.0517417
	0.103483				0.258709
	0.0517417				0.258709
	0.103483				0.155225
	0.0517417				0.931351
	0.155225				1.39703
	0.103483				0.517417
	0.569159				0.155225
	0.0517417				0.31045
	0.0517417				0.206967
	0.0517417				0.31045
	0.258709				0.31045
	0.362192				0.103483
	0.155225				0.0517417
	0.103483				0.155225
	0.0517417				0.206967
	0.0517417				0.258709
	0.0517417				0.155225
	0.0517417				0.724384
	0.0517417				0.103483
	0.0517417				0.155225
	0.0517417				0.155225
	0.31045				1.44877
	0.206967				2.79405
	0.258709				0.103483
	0.103483				0.517417
	0.0517417				0.206967
	0.31045				0.155225
	0.206967				1.13832
	0.413934				0.103483
	0.258709				1.34529
	0.103483				0.362192
	0.31045				0.465676
	0.155225				2.63883
	0.258709				0.103483
	0.0517417				0.724384
	0.0517417				0.569159
	0.0517417				0.620901
	0.413934				1.03483
	0.155225				0.31045
	0.0517417				0.776126
	0.362192				0.103483
	0.155225				1.55225
	0.0517417				0.206967
	0.155225				0.155225
	0.0517417				1.50051
	0.258709				0.0517417
	0.103483				1.19006
	0.0517417				1.03483
	0.517417				0.0517417
	0.155225				0.724384
	0.155225				0.0517417
	0.155225				3.15625
	0.0517417				1.8627
	0.103483				0.983093
	0.31045				0.155225
	0.827868				0.258709
	0.0517417				1.96619
	0.155225				0.465676
	0.776126				0.0517417
	0.206967				0.0517417
	0.465676				0.827868
	0.206967				0.103483
	0.206967				0.258709
	0.258709				0.31045
	0.776126				0.362192
	0.0517417				0.413934
	0.206967				0.206967
	0.31045				0.465676
	0.569159				0.103483
	0.103483				0.776126
	0.0517417				0.0517417
	0.0517417				0.103483
	0.983093				0.103483
	0.0517417				0.103483
	0.0517417				0.776126
	0.0517417				0.413934
	0.362192				0.465676
	0.103483				0.206967
	0.155225				0.0517417
	0.155225				0.0517417
	0.155225				0.0517417
	0.103483				0.103483
	0.517417				0.413934
	0.155225				1.50051
	0.0517417				0.206967
	0.0517417				0.103483
	0.258709				0.103483
	0.0517417				0.569159
	0.103483				0.206967
	0.724384				1.8627
	0.155225				0.103483
	0.31045				0.103483
	0.206967				0.517417
	0.103483				0.155225
	0.569159				0.87961
	0.103483				0.724384
	0.206967				0.0517417
	0.258709				0.827868
	0.258709				0.0517417
	0.31045				0.0517417
	0.413934				0.413934
	0.413934				0.258709
	0.206967				0.87961
	0.103483				0.413934
	0.0517417				0.0517417
	0.0517417				1.08658
	0.103483				0.517417
	0.0517417				0.31045
	0.103483				0.672643
	0.206967				0.103483
	0.0517417				0.827868
	0.103483				0.465676
	0.258709				0.0517417
	0.155225				0.0517417
	0.31045				0.0517417
	0.103483				0.258709
	0.0517417				0.362192
	0.0517417				1.03483
	0.155225				0.413934
	0.0517417				0.724384
	0.155225				0.155225
	0.0517417				1.2418
	0.103483				0.465676
	0.103483				0.0517417
	0.103483				0.362192
	0.103483				0.31045
	0.103483				0.87961
	0.103483				0.931351
	0.103483				0.31045
	0.103483				0.517417
	0.103483				0.0517417
	0.31045				0.103483
	0.103483				0.155225
	0.31045				0.0517417
	0.0517417				0.0517417
	0.0517417				0.672643
	0.103483				0.0517417
	0.517417				0.258709
	0.0517417				0.0517417
	0.103483				1.50051
	0.103483				1.34529
	0.0517417				0.931351
	0.103483				0.413934
	0.0517417				0.724384
	0.0517417				0.103483
	0.0517417				0.87961
	0.103483				1.91444
	0.0517417				0.569159
	0.413934				0.931351
	0.87961				0.465676
	0.155225				0.362192
	0.155225				0.776126
	0.0517417				0.155225
	0.258709				0.517417
	0.103483				0.465676
	1.81096				2.01793
	0.103483				0.206967
	0.0517417				1.08658
	0.569159				0.931351
	0.155225				0.103483
	0.155225				0.0517417
	0.155225				0.31045
	0.258709				0.258709
	0.258709				0.0517417
	0.155225				0.724384
	0.413934				0.206967
	0.258709				0.362192
	0.362192				0.103483
	0.103483				0.103483
	0.0517417				0.0517417
	0.103483				0.103483
	0.155225				0.776126
	0.0517417				0.31045
	0.0517417				0.155225
	0.0517417				0.362192
	0.0517417				0.103483
	0.413934				0.258709
	0.0517417				0.0517417
	0.258709				0.0517417
	0.103483				0.362192
	0.103483				0.103483
	0.103483				0.672643
	0.258709				0.258709
	0.103483				1.2418
	0.206967				0.362192
	0.155225				0.620901
	0.0517417				1.03483
	0.0517417				1.75922
	0.0517417				0.103483
	0.0517417				1.08658
	0.0517417				1.13832
	0.0517417				0.362192
	0.0517417				0.413934
	0.0517417				0.31045
	0.0517417				1.2418
	0.0517417				0.258709
	0.103483				0.31045
	0.103483				0.362192
	0.0517417				0.0517417
	0.103483				0.103483
	0.103483				0.776126
	0.0517417				0.155225
	0.0517417				0.155225
	0.0517417				0.103483
	0.0517417				0.258709
	0.0517417				0.31045
	0.103483				0.258709
	0.0517417				0.620901
	0.0517417				0.155225
	0.0517417				0.0517417
	0.258709				0.0517417
	0.413934				2.06967
	0.103483				0.931351
	0.103483				0.827868
	0.0517417				0.983093
	0.103483				0.776126
	0.103483				0.103483
	0.103483				0.362192
	0.206967				0.465676
	0.258709				0.413934
	0.103483				0.31045
	0.206967				0.776126
	0.517417				0.672643
	0.362192				6.62294
	0.103483				0.206967
	0.0517417				0.258709
	0.413934				0.517417
	0.0517417				0.724384
	0.206967				0.0517417
	0.258709				0.103483
	0.103483				0.413934
	0.103483				1.44877
	0.206967				0.413934
	0.0517417				0.103483
	0.0517417				0.517417
	0.206967				0.103483
	0.103483				0.258709
	0.103483				0.31045
	0.103483				0.620901
	0.0517417				0.362192
	0.0517417				0.87961
	1.60399				0.87961
	0.0517417				0.206967
	0.206967				0.776126
	0.569159				0.155225
	0.103483				0.0517417
	0.103483				0.155225
	0.155225				0.517417
	0.155225				1.13832
	0.206967				0.620901
	0.206967				0.0517417
	0.0517417				0.31045
	0.0517417				1.50051
	0.31045				0.672643
	0.103483				0.362192
	0.155225				0.724384
	0.206967				1.13832
	0.31045				1.44877
	0.206967				1.29354
	0.362192				0.103483
	0.0517417				0.569159
	0.103483				0.724384
	0.465676				0.465676
	0.155225				0.206967
	0.155225				0.258709
	0.0517417				0.155225
	0.362192				2.4836
	0.258709				0.87961
	0.31045				0.31045
	0.0517417				0.620901
	0.155225				0.517417
	0.0517417				0.31045
	0.206967				0.258709
	0.0517417				0.206967
	0.155225				1.60399
	0.0517417				0.155225
	0.0517417				1.8627
	0.103483				2.58709
	0.103483				0.0517417
	0.103483				0.0517417
	0.413934				0.724384
	0.362192				0.517417
	0.103483				0.103483
	0.206967				0.620901
	0.31045				0.155225
	0.155225				0.413934
	0.103483				0.362192
	0.362192				0.413934
	0.206967				0.569159
	0.0517417				1.19006
	0.0517417				0.0517417
	0.0517417				2.32838
	0.206967				0.206967
	0.620901				0.103483
	0.258709				0.155225
	0.258709				2.32838
	0.0517417				0.258709
	0.206967				0.413934
	0.103483				0.103483
	0.258709				0.206967
	0.0517417				0.206967
	0.103483				0.569159
	0.0517417				0.258709
	0.155225				0.258709
	0.155225				0.155225
	0.155225				0.206967
	0.569159				0.362192
	0.465676				0.155225
	0.206967				0.258709
	0.206967				0.87961
	0.103483				1.55225
	0.0517417				0.258709
	0.0517417				0.362192
	0.155225				0.620901
	0.103483				0.206967
	0.0517417				0.0517417
	0.155225				0.0517417
	0.103483				0.155225
	0.0517417				0.0517417
	0.0517417				0.569159
	0.155225				0.413934
	0.103483				0.569159
	0.103483				0.0517417
	0.0517417				1.44877
	0.0517417				0.776126
	0.0517417				0.362192
	0.0517417				0.413934
	0.0517417				3.88063
	0.0517417				1.08658
	0.0517417				0.258709
	0.0517417				0.258709
	0.0517417				0.31045
	0.31045				0.362192
	0.724384				0.103483
	0.206967				0.103483
	0.465676				0.0517417
	0.517417				0.0517417
	0.776126				0.0517417
	0.258709				0.362192
	0.517417				2.94928
	0.258709				0.465676
	0.0517417				0.0517417
	0.155225				0.0517417
	0.31045				1.19006
	0.155225				0.103483
	0.362192				0.206967
	0.31045				0.206967
	0.103483				0.362192
	0.103483				0.465676
	0.0517417				0.87961
	0.155225				0.983093
	0.0517417				0.155225
	0.0517417				0.465676
	0.0517417				1.8627
	0.0517417				0.258709
	0.0517417				0.103483
	0.0517417				2.32838
	0.103483				0.517417
	0.103483				0.672643
	0.0517417				0.724384
	0.155225				0.0517417
	0.0517417				0.258709
	0.0517417				0.103483
	0.103483				0.155225
	0.0517417				1.13832
	0.103483				0.362192
	0.0517417				0.0517417
	0.0517417				0.569159
	0.155225				0.0517417
	0.155225				0.103483
	0.0517417				0.465676
	0.258709				0.0517417
	0.0517417				0.517417
	0.206967				1.34529
	0.103483				0.31045
	0.258709				0.517417
	0.103483				0.0517417
	0.0517417				0.31045
	0.0517417				1.08658
	0.103483				0.362192
	0.0517417				0.103483
	0.0517417				0.0517417
	0.0517417				0.0517417
	0.0517417				1.34529
	0.0517417				0.931351
	0.0517417				0.413934
	0.0517417				1.39703
	0.0517417				0.0517417
	0.0517417				0.31045
	0.931351				0.620901
	0.413934				1.65574
	0.31045				0.672643
	0.103483				0.155225
	0.931351				0.258709
	0.103483				1.39703
	0.0517417				1.03483
	0.206967				0.362192
	0.31045				1.29354
	0.31045				0.206967
	0.155225				1.34529
	0.31045				1.96619
	1.19006				0.103483
	0.103483				0.827868
	0.0517417				1.91444
	0.155225				0.258709
	0.0517417				0.931351
	0.0517417				0.569159
	0.0517417				0.103483
	0.103483				1.03483
	0.103483				0.206967
	0.103483				0.569159
	0.103483				0.103483
	0.0517417				0.0517417
	0.206967				0.103483
	0.0517417				0.465676
	0.206967				0.672643
	0.258709				0.155225
	0.206967				0.776126
	0.0517417				0.931351
	0.0517417				0.776126
	0.103483				0.362192
	0.0517417				0.31045
	0.258709				0.517417
	0.31045				0.465676
	0.31045				0.31045
	0.0517417				0.206967
	0.206967				0.0517417
	0.206967				1.2418
	0.155225				0.103483
	0.413934				0.569159
	0.362192				0.258709
	0.103483				1.81096
	0.0517417				5.9503
	0.155225				0.206967
	0.155225				0.206967
	0.0517417				0.103483
	0.0517417				0.206967
	0.206967				0.103483
	0.0517417				0.0517417
	0.0517417				0.465676
	0.103483				1.44877
	0.0517417				0.465676
	0.362192				0.258709
	0.362192				0.724384
	0.0517417				0.465676
	0.620901				0.362192
	0.206967				1.75922
	0.362192				0.465676
	0.413934				0.362192
	0.103483				0.258709
	0.31045				0.155225
	0.0517417				0.517417
	0.103483				0.258709
	0.206967				0.258709
	0.103483				0.31045
	0.155225				0.465676
	0.103483				0.0517417
	0.103483				0.103483
	0.103483				0.258709
	0.103483				0.413934
	0.103483				0.724384
	0.103483				0.517417
	0.0517417				0.620901
	0.0517417				0.413934
	0.0517417				0.413934
	0.103483				0.31045
	0.206967				0.206967
	0.258709				3.67366
	0.155225				0.931351
	1.44877				0.362192
	0.103483				2.58709
	0.0517417				0.155225
	0.258709				2.17315
	0.258709				0.620901
	0.103483				0.465676
	0.206967				0.258709
	0.0517417				0.0517417
	0.258709				0.0517417
	0.206967				0.620901
	0.0517417				0.931351
	0.103483				0.87961
	0.0517417				0.0517417
	0.103483				0.362192
	0.0517417				0.258709
	0.103483				0.258709
	0.31045				0.31045
	0.31045				0.155225
	0.258709				2.06967
	0.0517417				1.03483
	0.103483				0.931351
	0.258709				0.155225
	0.31045				0.362192
	0.206967				0.517417
	0.258709				2.43186
	0.103483				0.31045
	0.0517417				0.0517417
	0.155225				0.0517417
	0.155225				0.517417
	0.0517417				0.776126
	0.0517417				0.0517417
	0.103483				0.258709
	0.569159				0.776126
	0.362192				0.983093
	0.103483				0.155225
	0.103483				0.931351
	0.155225				0.206967
	0.258709				0.362192
	0.206967				0.569159
	0.155225				0.0517417
	0.465676				0.0517417
	0.103483				2.12141
	0.258709				0.206967
	0.206967				0.672643
	0.155225				2.01793
	0.258709				0.258709
	0.155225				1.03483
	0.362192				0.362192
	0.206967				0.362192
	0.103483				0.0517417
	0.0517417				0.103483
	0.0517417				0.103483
	0.103483				0.206967
	0.155225				0.103483
	0.258709				0.155225
	0.0517417				1.08658
	0.206967				0.413934
	0.0517417				0.155225
	0.155225				0.362192
	0.569159				0.155225
	0.206967				0.0517417
	0.569159				0.206967
	0.206967				0.620901
	0.206967				0.0517417
	0.258709				0.103483
	0.0517417				2.12141
	0.0517417				0.983093
	0.0517417				0.155225
	0.103483				0.206967
	0.0517417				0.0517417
	0.155225				0.31045
	0.0517417				0.413934
	0.206967				0.103483
	0.103483				1.34529
	0.672643				0.0517417
	0.413934				0.0517417
	0.155225				0.672643
	0.31045				0.103483
	0.620901				0.362192
	0.0517417				0.362192
	0.0517417				0.569159
	0.0517417				0.724384
	0.0517417				0.0517417
	0.155225				0.362192
	0.103483				0.724384
	0.413934				0.206967
	0.206967				0.413934
	0.0517417				0.31045
	0.103483				0.206967
	0.155225				0.362192
	0.206967				0.31045
	0.0517417				0.0517417
	0.0517417				1.55225
	0.0517417				0.31045
	0.206967				0.362192
	0.258709				0.620901
	0.155225				2.01793
	0.0517417				0.413934
	0.0517417				0.206967
	0.103483				0.103483
	0.0517417				0.31045
	0.103483				0.103483
	0.0517417				0.103483
	0.206967				0.0517417
	0.103483				0.413934
	0.0517417				1.08658
	0.103483				0.0517417
	0.258709				1.03483
	0.103483				0.0517417
	0.155225				0.931351
	0.103483				0.569159
	0.103483				0.776126
	0.362192				0.155225
	0.465676				2.69057
	0.103483				1.39703
	0.103483				0.155225
	0.362192				0.31045
	0.0517417				0.258709
	0.0517417				1.19006
	0.103483				0.87961
	0.103483				1.44877
	0.0517417				0.206967
	0.103483				0.776126
	0.103483				0.569159
	0.0517417				0.0517417
	0.103483				1.70748
	0.0517417				0.155225
	0.0517417				0.517417
	0.0517417				0.0517417
	0.258709				0.103483
	0.103483				0.103483
	0.0517417				0.0517417
	0.0517417				0.413934
	0.0517417				1.29354
	0.0517417				0.206967
	0.258709				0.620901
	0.155225				0.776126
	0.103483				0.931351
	0.103483				2.63883
	0.0517417				0.0517417
	0.103483				1.70748
	2.38012				1.03483
	0.258709				0.362192
	0.31045				0.155225
	0.0517417				0.413934
	0.103483				0.0517417
	0.206967				0.206967
	0.103483				0.776126
	0.258709				1.44877
	0.569159				0.413934
	0.31045				0.206967
	0.206967				0.103483
	0.103483				0.103483
	0.31045				0.103483
	0.0517417				0.258709
	0.0517417				0.362192
	0.0517417				2.22489
	0.103483				0.362192
	0.103483				0.620901
	0.155225				0.0517417
	0.258709				0.0517417
	0.206967				0.103483
	0.155225				0.103483
	0.103483				0.206967
	0.258709				0.103483
	0.206967				0.413934
	0.103483				0.258709
	0.103483				0.0517417
	0.103483				0.620901
	0.103483				0.776126
	0.155225				0.0517417
	0.103483				0.517417
	0.103483				0.155225
	0.258709				1.03483
	0.155225				2.63883
	0.0517417				1.55225
	0.155225				0.0517417
	0.0517417				0.103483
	0.0517417				0.413934
	0.103483				1.34529
	0.0517417				0.103483
	0.103483				1.08658
	0.103483				0.517417
	0.0517417				0.0517417
	0.103483				0.258709
	0.0517417				1.34529
	0.0517417				0.0517417
	0.206967				0.0517417
	0.155225				0.0517417
	0.258709				0.155225
	0.206967				0.0517417
	0.724384				0.0517417
	0.258709				0.0517417
	0.103483				1.03483
	0.103483				0.31045
	0.0517417				0.31045
	0.103483				0.258709
	0.258709				0.672643
	0.206967				0.620901
	0.0517417				0.155225
	0.103483				0.672643
	0.103483				0.362192
	0.0517417				0.620901
	0.155225				1.13832
	0.517417				0.569159
	0.0517417				0.620901
	0.0517417				0.724384
	0.0517417				1.34529
	0.0517417				0.103483
	0.413934				0.0517417
	0.103483				0.0517417
	0.155225				0.206967
	0.413934				0.206967
	0.103483				0.155225
	0.0517417				0.0517417
	0.0517417				0.155225
	0.0517417				0.0517417
	0.0517417				1.08658
	0.0517417				0.103483
	0.0517417				0.155225
	0.0517417				1.39703
	0.0517417				0.983093
	0.0517417				1.34529
	0.0517417				0.672643
	0.0517417				0.827868
	0.103483				0.413934
	0.103483				0.103483
	0.103483				0.87961
	0.103483				0.362192
	0.0517417				0.0517417
	0.103483				0.0517417
	0.258709				0.724384
	0.517417				0.206967
	0.103483				0.155225
	0.258709				0.258709
	0.362192				0.465676
	0.0517417				0.155225
	0.103483				0.155225
	0.155225				0.776126
	0.31045				0.103483
	0.103483				0.931351
	0.0517417				0.103483
	0.0517417				0.0517417
	0.0517417				0.517417
	0.103483				0.0517417
	0.103483				0.0517417
	0.103483				0.0517417
	0.155225				0.465676
	0.31045				0.258709
	0.0517417				0.517417
	0.258709				0.724384
	0.258709				0.206967
	0.103483				0.258709
	0.103483				0.258709
	0.465676				1.29354
	1.13832				1.50051
	0.362192				0.0517417
	0.206967				0.103483
	0.362192				1.08658
	0.258709				0.0517417
	0.0517417				0.0517417
	0.620901				0.413934
	0.206967				0.0517417
	0.413934				0.206967
	0.362192				0.362192
	0.206967				0.155225
	0.103483				0.31045
	0.0517417				1.08658
	0.155225				0.517417
	0.103483				0.827868
	0.206967				0.103483
	0.0517417				0.103483
	0.0517417				0.517417
	0.0517417				0.258709
	0.0517417				0.155225
	0.0517417				0.206967
	0.0517417				0.0517417
	0.0517417				0.983093
	0.103483				0.465676
	0.103483				1.03483
	0.103483				0.258709
	0.103483				0.413934
	0.103483				0.103483
	0.103483				0.517417
	0.103483				0.413934
	0.103483				0.206967
	0.155225				0.724384
	0.0517417				0.776126
	0.155225				0.413934
	0.362192				0.517417
	0.103483				0.103483
	0.362192				0.103483
	0.0517417				0.776126
	0.517417				0.672643
	0.206967				0.983093
	0.103483				1.39703
	0.0517417				0.103483
	0.155225				0.776126
	0.0517417				0.0517417
	0.0517417				1.55225
	0.0517417				0.155225
	0.0517417				0.155225
	0.0517417				0.672643
	0.0517417				0.258709
	0.0517417				0.155225
	0.155225				0.362192
	0.155225				0.206967
	0.206967				1.65574
	0.258709				0.0517417
	0.0517417				2.01793
	0.103483				0.362192
	0.103483				0.206967
	0.569159				0.103483
	0.206967				0.672643
	0.206967				0.0517417
	0.258709				0.413934
	0.0517417				3.77715
	0.0517417				0.517417
	0.103483				0.103483
	0.0517417				0.206967
	0.0517417				3.20799
	0.0517417				0.569159
	0.0517417				0.569159
	0.258709				0.362192
	0.155225				0.362192
	0.0517417				0.155225
	0.155225				1.2418
	0.155225				0.0517417
	0.155225				0.776126
	0.31045				0.620901
	0.206967				0.620901
	0.155225				0.155225
	0.0517417				0.672643
	0.206967				0.103483
	0.103483				0.672643
	0.103483				0.931351
	0.206967				0.31045
	0.103483				0.0517417
	0.258709				0.31045
	0.0517417				0.776126
	0.103483				0.0517417
	0.155225				4.86372
	0.206967				0.103483
	0.103483				0.0517417
	0.0517417				1.91444
	0.258709				1.08658
	0.103483				0.31045
	0.31045				0.258709
	0.103483				0.413934
	0.517417				0.827868
	0.103483				0.517417
	0.620901				3.31147
	0.155225				0.0517417
	0.206967				1.19006
	0.0517417				0.155225
	0.0517417				0.206967
	0.103483				0.155225
	0.103483				2.22489
	0.103483				0.31045
	0.0517417				0.362192
	0.0517417				1.44877
	0.103483				0.0517417
	0.0517417				0.206967
	0.0517417				0.206967
	0.0517417				0.0517417
	0.0517417				0.0517417
	0.103483				0.155225
	0.155225				0.31045
	0.155225				0.413934
	0.155225				0.465676
	0.362192				0.465676
	0.0517417				1.2418
	0.155225				0.413934
	0.103483				0.362192
	0.155225				0.724384
	0.465676				0.103483
	0.206967				0.0517417
	0.362192				0.983093
	0.206967				0.413934
	0.155225				0.413934
	0.0517417				1.65574
	0.103483				0.206967
	0.155225				0.569159
	0.0517417				0.87961
	0.0517417				0.31045
	0.0517417				0.413934
	0.0517417				0.103483
	0.0517417				0.569159
	0.0517417				0.465676
	0.0517417				0.672643
	0.103483				0.258709
	0.0517417				1.29354
	0.0517417				1.34529
	0.0517417				0.31045
	0.0517417				0.103483
	0.0517417				1.39703
	0.0517417				0.672643
	0.155225				0.672643
	0.362192				0.103483
	0.103483				0.569159
	0.103483				0.258709
	0.0517417				0.103483
	0.155225				0.983093
	0.103483				0.569159
	0.258709				0.31045
	0.0517417				0.465676
	0.31045				0.983093
	0.0517417				0.206967
	0.206967				1.08658
	0.103483				0.0517417
	0.155225				0.87961
	0.206967				0.983093
	0.0517417				0.31045
	0.103483				0.258709
	0.103483				0.206967
	0.155225				1.55225
	0.413934				0.103483
	0.0517417				0.206967
	0.103483				0.103483
	0.672643				0.362192
	0.103483				0.258709
	0.0517417				0.983093
	0.155225				0.103483
	0.776126				0.724384
	0.103483				0.155225
	0.155225				0.155225
	0.258709				0.569159
	0.517417				0.206967
	0.103483				0.155225
	0.206967				0.0517417
	0.103483				0.206967
	0.0517417				0.569159
	0.0517417				0.206967
	0.155225				0.258709
	0.155225				0.0517417
	0.0517417				0.31045
	0.0517417				1.34529
	0.0517417				0.103483
	0.0517417				0.155225
	0.0517417				0.0517417
	0.103483				0.620901
	0.103483				0.413934
	0.206967				0.0517417
	0.724384				0.258709
	0.362192				0.931351
	0.465676				0.0517417
	0.31045				0.31045
	0.206967				0.517417
	0.31045				0.827868
	1.03483				0.362192
	0.103483				0.465676
	0.155225				0.776126
	2.17315				0.31045
	0.569159				0.465676
	0.258709				0.31045
	0.103483				2.32838
	0.258709				0.0517417
	0.362192				0.0517417
	0.206967				0.517417
	0.206967				0.413934
	0.0517417				0.155225
	0.0517417				1.13832
	0.0517417				0.620901
	0.155225				0.258709
	0.155225				0.155225
	0.206967				0.103483
	0.206967				0.465676
	0.0517417				0.362192
	0.103483				0.931351
	0.155225				0.0517417
	0.0517417				0.413934
	0.0517417				0.258709
	0.103483				0.465676
	0.413934				0.517417
	0.103483				0.362192
	0.103483				0.258709
	0.258709				0.0517417
	0.206967				1.8627
	0.362192				0.155225
	0.155225				0.206967
	0.155225				0.827868
	0.155225				0.87961
	0.103483				0.931351
	0.155225				0.155225
	0.258709				1.13832
	0.155225				0.0517417
	0.0517417				1.91444
	0.103483				0.206967
	0.206967				0.103483
	0.155225				0.0517417
	0.155225				0.0517417
	0.517417				0.362192
	0.258709				1.13832
	0.206967				0.206967
	0.258709				0.258709
	0.155225				0.620901
	0.258709				0.362192
	0.0517417				0.31045
	0.413934				0.465676
	0.103483				0.362192
	0.103483				0.672643
	0.206967				1.75922
	0.103483				0.517417
	0.155225				0.620901
	0.0517417				0.0517417
	0.0517417				0.0517417
	0.0517417				0.0517417
	0.0517417				0.724384
	0.0517417				0.362192
	0.0517417				0.620901
	0.155225				0.258709
	0.0517417				1.13832
	0.155225				0.258709
	0.103483				0.569159
	0.0517417				0.569159
	0.0517417				0.155225
	0.362192				0.0517417
	0.0517417				0.258709
	0.0517417				0.31045
	0.0517417				0.0517417
	0.0517417				0.0517417
	0.103483				0.931351
	0.258709				0.465676
	0.0517417				0.206967
	0.0517417				0.103483
	0.0517417				1.13832
	0.0517417				3.15625
	0.362192				0.258709
	0.258709				0.620901
	0.155225				1.13832
	0.0517417				0.931351
	0.362192				1.91444
	0.0517417				0.103483
	0.0517417				0.258709
	0.0517417				0.206967
	0.465676				0.206967
	0.413934				0.103483
	0.258709				0.413934
	0.155225				0.362192
	0.827868				0.413934
	0.258709				0.0517417
	0.0517417				0.0517417
	0.206967				0.0517417
	0.569159				0.155225
	0.0517417				0.413934
	0.206967				0.155225
	0.569159				0.155225
	0.206967				0.31045
	0.206967				0.103483
	0.0517417				0.206967
	0.103483				0.517417
	0.0517417				0.31045
	0.0517417				0.103483
	0.103483				0.465676
	0.0517417				0.0517417
	0.465676				0.517417
	0.413934				1.03483
	0.258709				0.258709
	0.0517417				0.258709
	0.103483				0.0517417
	0.0517417				0.0517417
	0.258709				0.155225
	0.103483				0.155225
	0.155225				0.155225
	0.31045				0.155225
	0.206967				0.362192
	0.103483				0.31045
	0.206967				0.620901
	0.155225				0.517417
	0.206967				0.0517417
	0.206967				0.0517417
	0.0517417				0.31045
	0.0517417				0.569159
	0.103483				0.103483
	0.103483				1.19006
	0.0517417				0.517417
	0.0517417				0.258709
	0.413934				0.103483
	0.517417				0.672643
	0.0517417				1.29354
	0.155225				0.31045
	0.31045				0.672643
	0.31045				0.620901
	0.155225				0.465676
	0.206967				0.724384
	0.31045				0.413934
	0.0517417				0.0517417
	0.155225				0.155225
	0.0517417				0.672643
	0.103483				0.517417
	0.0517417				0.155225
	0.103483				0.931351
	0.103483				0.155225
	0.983093				0.0517417
	0.103483				0.724384
	0.0517417				1.75922
	0.103483				0.0517417
	0.155225				0.31045
	0.362192				1.08658
	0.31045				0.0517417
	0.258709				1.75922
	0.31045				0.31045
	0.155225				0.672643
	0.206967				0.103483
	0.155225				0.155225
	0.0517417				0.31045
	1.44877				0.103483
	0.362192				0.724384
	0.0517417				1.2418
	0.103483				1.2418
	0.155225				0.103483
	0.258709				0.31045
	0.206967				0.983093
	0.155225				2.12141
	0.0517417				1.44877
	0.103483				0.0517417
	0.0517417				0.0517417
	0.258709				0.0517417
	0.0517417				0.0517417
	0.0517417				0.258709
	0.0517417				0.0517417
	0.0517417				0.103483
	0.0517417				0.258709
	0.0517417				0.103483
	0.0517417				3.31147
	0.0517417				0.0517417
	0.155225				0.155225
	0.206967				0.103483
	0.620901				1.03483
	0.0517417				0.258709
	0.155225				0.103483
	0.103483				0.206967
	0.362192				1.70748
	0.0517417				0.724384
	0.776126				0.103483
	0.103483				0.0517417
	0.517417				0.517417
	0.103483				0.569159
	0.0517417				2.17315
	0.155225				1.2418
	0.206967				2.38012
	0.155225				0.0517417
	0.206967				0.0517417
	0.362192				0.0517417
	0.155225				0.0517417
	0.517417				0.0517417
	0.103483				0.724384
	0.258709				0.258709
	0.103483				0.258709
	0.258709				0.620901
	0.31045				0.569159
	0.103483				0.362192
	0.206967				1.08658
	0.206967				1.81096
	0.258709				3.93237
	0.258709				0.569159
	0.31045				1.19006
	0.0517417				0.0517417
	0.103483				0.0517417
	0.0517417				0.413934
	0.0517417				0.31045
	0.103483				0.206967
	0.103483				2.4836
	0.155225				0.155225
	0.103483				0.103483
	0.103483				0.103483
	0.0517417				0.103483
	0.103483				0.258709
	0.103483				0.103483
	0.0517417				0.258709
	0.0517417				0.569159
	0.103483				0.103483
	0.0517417				0.103483
	0.0517417				0.206967
	0.0517417				0.776126
	0.0517417				0.0517417
	0.0517417				0.155225
	0.0517417				0.258709
	0.103483				0.155225
	0.0517417				0.206967
	0.258709				0.31045
	0.0517417				0.0517417
	0.103483				0.0517417
	0.103483				0.465676
	0.103483				1.44877
	0.206967				0.206967
	0.155225				0.413934
	0.258709				0.931351
	0.103483				0.517417
	0.155225				0.206967
	0.0517417				0.103483
	0.155225				0.206967
	0.103483				0.724384
	0.258709				0.258709
	0.31045				0.0517417
	0.31045				0.465676
	0.103483				0.103483
	0.0517417				0.103483
	0.413934				0.206967
	0.155225				0.517417
	0.155225				0.0517417
	0.0517417				0.776126
	0.103483				0.724384
	0.258709				0.258709
	0.206967				1.75922
	0.0517417				0.983093
	0.0517417				0.0517417
	0.103483				0.103483
	0.31045				0.0517417
	0.413934				0.103483
	0.103483				0.931351
	0.155225				0.103483
	0.155225				0.103483
	0.103483				0.517417
	0.206967				0.362192
	0.103483				0.155225
	0.103483				0.103483
	0.206967				1.60399
	0.155225				0.103483
	0.0517417				0.206967
	0.103483				0.31045
	0.0517417				0.0517417
	0.0517417				0.517417
	0.0517417				0.0517417
	0.0517417				0.0517417
	0.103483				0.0517417
	0.0517417				0.103483
	0.103483				0.362192
	0.155225				0.776126
	0.0517417				0.0517417
	0.0517417				0.672643
	0.0517417				0.931351
	0.0517417				0.0517417
	0.0517417				0.569159
	0.0517417				0.724384
	0.0517417				0.931351
	0.0517417				0.776126
	0.0517417				0.0517417
	0.206967				0.155225
	0.0517417				0.206967
	0.155225				0.672643
	0.0517417				0.103483
	0.827868				0.983093
	0.103483				0.103483
	0.0517417				0.931351
	0.155225				0.155225
	0.103483				0.362192
	0.155225				0.206967
	0.0517417				0.672643
	0.155225				0.465676
	0.724384				0.0517417
	0.155225				0.103483
	0.0517417				0.776126
	0.103483				1.29354
	0.206967				1.70748
	0.103483				0.31045
	0.206967				0.206967
	0.155225				0.258709
	0.724384				0.0517417
	0.103483				0.31045
	0.517417				0.206967
	0.103483				0.155225
	0.465676				0.672643
	0.258709				0.258709
	0.362192				0.155225
	0.155225				0.155225
	2.38012				0.620901
	0.103483				1.08658
	0.155225				0.258709
	0.413934				0.258709
	0.569159				0.31045
	0.362192				0.465676
	0.206967				0.155225
	0.0517417				0.0517417
	0.31045				1.2418
	0.672643				0.31045
	0.155225				0.983093
	0.0517417				0.0517417
	0.103483				0.569159
	0.103483				0.103483
	0.0517417				0.103483
	0.0517417				0.103483
	0.155225				0.465676
	0.31045				0.31045
	0.31045				2.17315
	0.206967				0.983093
	0.206967				0.0517417
	0.258709				0.0517417
	1.8627				2.89754
	0.155225				0.0517417
	0.0517417				0.0517417
	0.155225				0.103483
	0.103483				1.34529
	0.0517417				0.569159
	0.103483				0.362192
	0.0517417				0.465676
	0.103483				0.569159
	0.0517417				0.362192
	0.0517417				0.31045
	0.103483				2.53535
	0.0517417				2.53535
	0.258709				1.44877
	0.0517417				0.776126
	0.0517417				0.155225
	0.0517417				0.362192
	0.0517417				0.206967
	0.155225				0.517417
	0.31045				0.672643
	0.413934				0.776126
	0.103483				0.413934
	0.31045				0.672643
	0.103483				0.620901
	0.206967				0.465676
	0.0517417				0.87961
	0.362192				0.103483
	0.206967				0.827868
	0.155225				0.465676
	0.31045				0.0517417
	0.0517417				0.155225
	0.258709				0.569159
	0.206967				0.206967
	0.206967				0.155225
	0.155225				0.0517417
	0.103483				0.0517417
	0.258709				0.103483
	0.0517417				0.362192
	1.60399				1.2418
	0.155225				0.0517417
	0.362192				0.0517417
	0.413934				1.2418
	0.103483				0.103483
	0.0517417				1.03483
	0.206967				0.465676
	0.258709				0.206967
	0.155225				0.362192
	0.0517417				0.465676
	0.31045				0.206967
	0.0517417				1.96619
	0.103483				1.08658
	0.103483				0.87961
	0.0517417				0.569159
	0.0517417				0.413934
	0.0517417				1.55225
	0.0517417				0.31045
	0.0517417				0.155225
	0.0517417				0.258709
	0.0517417				0.620901
	0.103483				0.465676
	0.103483				0.0517417
	0.103483				0.569159
	0.155225				0.0517417
	0.31045				0.103483
	0.103483				1.2418
	0.103483				0.620901
	0.362192				0.672643
	0.0517417				0.103483
	0.0517417				0.31045
	0.0517417				0.465676
	0.0517417				1.50051
	0.0517417				0.0517417
[truncated: 5,228 more rows]
