# Supplementary material for: Molecular dissection of PI3Kβ synergistic activation by receptor tyrosine kinases, GβGγ, and Rho-family GTPases
Source: eLife. 2024 May 7;12:RP88991. doi: 10.7554/eLife.88991 (PMC11076043; doi:10.7554/eLife.88991)
Supplement: Figure 5—figure supplement 1—source data 2. [file elife-88991-fig5-figsupp1-data2.xlsx]

## Sheet: Fig 5 - FS1C
Figure 5 -	Single molecule tracking step size distribution
figure supplement 1C
	25 pM Btk-SNAP-AF488					50 pM Grp1-AF555
	step size (µm)	bin (µm)	freq	prob. Density		step size (µm)	bin (µm)	freq	prob. Density
	0.284848	0	0.000928182	0.0928182		0.329332	0	0.000810443	0.0810443
	0.189228	0.01	0.00212708	0.212708		0.31537	0.01	0.00159194	0.159194
	0.483194	0.02	0.00363538	0.363538		0.299731	0.02	0.00280761	0.280761
	0.0405346	0.03	0.00564644	0.564644		0.0957741	0.03	0.00486266	0.486266
	0.236003	0.04	0.0076575	0.76575		0.221851	0.04	0.0061941	0.61941
	0.195831	0.05	0.00877905	0.877905		0.248468	0.05	0.00706243	0.706243
	0.362018	0.06	0.0104807	1.04807		0.498932	0.06	0.00845176	0.845176
	0.214	0.07	0.011757	1.1757		0.306691	0.07	0.00972532	0.972532
	0	0.08	0.0124531	1.24531		0.148589	0.08	0.0112594	1.12594
	0.0986525	0.09	0.0132266	1.32266		0.343913	0.09	0.0112594	1.12594
	0.442754	0.1	0.0143481	1.43481		0.413312	0.1	0.0127934	1.27934
	0.12494	0.11	0.0160111	1.60111		0.306242	0.11	0.0146169	1.46169
	0.196892	0.12	0.018525	1.8525		0.12052	0.12	0.014559	1.4559
	0.159178	0.13	0.0215029	2.15029		0.118396	0.13	0.0154853	1.54853
	0.128511	0.14	0.0215029	2.15029		0.232577	0.14	0.0152826	1.52826
	0.157026	0.15	0.0211935	2.11935		0.640215	0.15	0.0157168	1.57168
	0.183869	0.16	0.0228178	2.28178		0.310876	0.16	0.01563	1.563
	0.0980524	0.17	0.0221603	2.21603		0.70088	0.17	0.0173956	1.73956
	0.10735	0.18	0.0225084	2.25084		0.678367	0.18	0.017193	1.7193
	0.0362926	0.19	0.0235139	2.35139		0.626473	0.19	0.0184376	1.84376
	0.125989	0.2	0.0222377	2.22377		0.796601	0.2	0.0204637	2.04637
	0.432311	0.21	0.0232045	2.32045		0.328029	0.21	0.0214189	2.14189
	0.522118	0.22	0.0241327	2.41327		0.658319	0.22	0.0211005	2.11005
	0.0139347	0.23	0.0227018	2.27018		0.236552	0.23	0.0210136	2.10136
	0.134454	0.24	0.0230885	2.30885		0.585353	0.24	0.0200585	2.00585
	0.162717	0.25	0.0199172	1.99172		0.667566	0.25	0.0201164	2.01164
	0.211996	0.26	0.0211548	2.11548		0.352086	0.26	0.0210136	2.10136
	0.0620627	0.27	0.0209614	2.09614		0.203915	0.27	0.0204347	2.04347
	0.365484	0.28	0.0205747	2.05747		0.39046	0.28	0.0206663	2.06663
	0.277475	0.29	0.0198786	1.98786		0.284628	0.29	0.0199427	1.99427
	0.562636	0.3	0.0192598	1.92598		0.091778	0.3	0.0200006	2.00006
	0.0961103	0.31	0.020536	2.0536		0.085045	0.31	0.019769	1.9769
	0.292324	0.32	0.0200719	2.00719		0.180883	0.32	0.0204058	2.04058
	0.379075	0.33	0.0193758	1.93758		0.070963	0.33	0.0195664	1.95664
	0.351684	0.34	0.0186797	1.86797		0.592301	0.34	0.0191322	1.91322
	0.989286	0.35	0.0173261	1.73261		0.336262	0.35	0.019277	1.9277
	0.718933	0.36	0.016862	1.6862		1.04606	0.36	0.0177429	1.77429
	0.807514	0.37	0.016978	1.6978		0.557885	0.37	0.0175982	1.75982
	0.106925	0.38	0.0162045	1.62045		0.396477	0.38	0.0164404	1.64404
	0.397171	0.39	0.0148509	1.48509		0.255157	0.39	0.0157747	1.57747
	0.312956	0.4	0.0146962	1.46962		0.403035	0.4	0.015601	1.5601
	0.339192	0.41	0.0137294	1.37294		0.269555	0.41	0.0165562	1.65562
	0.361742	0.42	0.011757	1.1757		0.0823337	0.42	0.0151958	1.51958
	0.554346	0.43	0.0141161	1.41161		0.993081	0.43	0.0143854	1.43854
	0.268528	0.44	0.0139227	1.39227		0.304569	0.44	0.0145011	1.45011
	0.621187	0.45	0.0108675	1.08675		0.15393	0.45	0.0136907	1.36907
	0.941503	0.46	0.010442	1.0442		0.00113041	0.46	0.0129671	1.29671
	0.450667	0.47	0.0105194	1.05194		0.165205	0.47	0.0121856	1.21856
	0.29981	0.48	0.010326	1.0326		0.576021	0.48	0.0126198	1.26198
	0.736822	0.49	0.00951386	0.951386		0.260578	0.49	0.0121277	1.21277
	0.0186397	0.5	0.0091658	0.91658		0.125047	0.5	0.0131408	1.31408
	0.325	0.51	0.00843099	0.843099		0.196513	0.51	0.0108541	1.08541
	0.332522	0.52	0.00866303	0.866303		0.135123	0.52	0.0117225	1.17225
	0.328823	0.53	0.0076575	0.76575		0.935036	0.53	0.0105068	1.05068
	0.350071	0.54	0.00707739	0.707739		0.536026	0.54	0.00981215	0.981215
	0.743557	0.55	0.00696136	0.696136		0.221028	0.55	0.0090596	0.90596
	0.625182	0.56	0.00727076	0.727076		0.939923	0.56	0.00891487	0.891487
	0.120018	0.57	0.00696136	0.696136		0.233994	0.57	0.00897276	0.897276
	0.117264	0.58	0.00634258	0.634258		0.417707	0.58	0.00740977	0.740977
	0.105018	0.59	0.0049503	0.49503		0.187943	0.59	0.0074966	0.74966
	0.795212	0.6	0.00560777	0.560777		0.309725	0.6	0.00720716	0.720716
	0.712224	0.61	0.00522102	0.522102		0.261955	0.61	0.00610727	0.610727
	0.0970421	0.62	0.00545307	0.545307		0.566645	0.62	0.00654143	0.654143
	0.185748	0.63	0.00533705	0.533705		0.33273	0.63	0.00604938	0.604938
	0.321368	0.64	0.00421549	0.421549		0.221959	0.64	0.00680193	0.680193
	0.335567	0.65	0.00386742	0.386742		0.234471	0.65	0.00549944	0.549944
	0.214608	0.66	0.00332599	0.332599		0.0529278	0.66	0.00547049	0.547049
	0.609458	0.67	0.00413814	0.413814		0.35779	0.67	0.00509421	0.509421
	0.298536	0.68	0.00409947	0.409947		0.240697	0.68	0.00480477	0.480477
	0.488953	0.69	0.00301659	0.301659		0.536076	0.69	0.00460216	0.460216
	0.0203468	0.7	0.00363538	0.363538		0.403849	0.7	0.00573099	0.573099
	0.281352	0.71	0.0035967	0.35967		0.392924	0.71	0.00422588	0.422588
	0.592841	0.72	0.00324864	0.324864		0.936279	0.72	0.00396538	0.396538
	0.473742	0.73	0.00297792	0.297792		0.326311	0.73	0.00370488	0.370488
	0.187664	0.74	0.00274587	0.274587		0.115544	0.74	0.00335755	0.335755
	0.51862	0.75	0.00247515	0.247515		0.362424	0.75	0.00344438	0.344438
	0.102127	0.76	0.00220443	0.220443		0.0824609	0.76	0.00367594	0.367594
	0.354124	0.77	0.00181769	0.181769		0.341239	0.77	0.00341544	0.341544
	0.753758	0.78	0.0015083	0.15083		0.30049	0.78	0.00306811	0.306811
	0.336882	0.79	0.00251383	0.251383		0.435776	0.79	0.0028655	0.28655
	0.204474	0.8	0.00216576	0.216576		0.145529	0.8	0.00280761	0.280761
	0.420834	0.81	0.00232045	0.232045		0.238931	0.81	0.00240239	0.240239
	0.202799	0.82	0.0015083	0.15083		0.121448	0.82	0.00274972	0.274972
	0.137132	0.83	0.00201106	0.201106		0.50502	0.83	0.00228661	0.228661
	0.188351	0.84	0.0015083	0.15083		0.218228	0.84	0.00214189	0.214189
	0.387207	0.85	0.00189504	0.189504		0.343348	0.85	0.00211294	0.211294
	0.353946	0.86	0.00131492	0.131492		0.471402	0.86	0.00199716	0.199716
	0.487157	0.87	0.00189504	0.189504		0.169327	0.87	0.00167878	0.167878
	0.104856	0.88	0.00143095	0.143095		0.512702	0.88	0.00179455	0.179455
	0.243359	0.89	0.00123758	0.123758		0.562067	0.89	0.00159194	0.159194
	0.307709	0.9	0.00162432	0.162432		0.766804	0.9	0.00164983	0.164983
	0.107611	0.91	0.00143095	0.143095		0.408894	0.91	0.00173666	0.173666
	0.443594	0.92	0.00131492	0.131492		0.184927	0.92	0.00115778	0.115778
	0.152113	0.93	0.00112155	0.112155		0.193597	0.93	0.00138933	0.138933
	0.137504	0.94	0.00127625	0.127625		0.298589	0.94	0.00170772	0.170772
	0.241725	0.95	0.00158564	0.158564		0.130892	0.95	0.00109989	0.109989
	0.382002	0.96	0.00127625	0.127625		0.84328	0.96	0.0013025	0.13025
	0.265393	0.97	0.00123758	0.123758		0.156197	0.97	0.001042	0.1042
	0.15793	0.98	0.0011989	0.11989		0.353538	0.98	0.000810443	0.0810443
	0.386647	0.99	0.00127625	0.127625		0.352946	0.99	0.001042	0.1042
	0.627567	1	0.00131492	0.131492		0.0919002	1	0.000839388	0.0839388
	0.107397	1.01	0.00158564	0.158564		0.795617	1.01	0.00098411	0.098411
	0.374236	1.02	0.00108288	0.108288		0.140513	1.02	0.000955165	0.0955165
	0.264891	1.03	0.00116023	0.116023		0.15687	1.03	0.00101305	0.101305
	0.500005	1.04	0.00116023	0.116023		0.112939	1.04	0.00072361	0.072361
	0.336299	1.05	0.00139227	0.139227		0.527099	1.05	0.000752554	0.0752554
	0.299446	1.06	0.000850833	0.0850833		0.387381	1.06	0.000752554	0.0752554
	0.386659	1.07	0.00123758	0.123758		0.187076	1.07	0.00101305	0.101305
	0.313393	1.08	0.000889508	0.0889508		0.431644	1.08	0.000868332	0.0868332
	0.153328	1.09	0.000966856	0.0966856		0.150786	1.09	0.000549944	0.0549944
	0.502879	1.1	0.000696136	0.0696136		0.302998	1.1	0.000520999	0.0520999
	0.21503	1.11	0.000928182	0.0928182		0.290183	1.11	0.000607832	0.0607832
	0.24622	1.12	0.000812159	0.0812159		0.0667081	1.12	0.000607832	0.0607832
	0.227004	1.13	0.000850833	0.0850833		0.294287	1.13	0.000636777	0.0636777
	0.392454	1.14	0.000889508	0.0889508		0.923755	1.14	0.000549944	0.0549944
	0.310113	1.15	0.000696136	0.0696136		0.499521	1.15	0.000694666	0.0694666
	0.213292	1.16	0.000773485	0.0773485		0.74179	1.16	0.000434166	0.0434166
	0.395233	1.17	0.000618788	0.0618788		0.237636	1.17	0.0002605	0.02605
	0.224773	1.18	0.000618788	0.0618788		0.230603	1.18	0.000665721	0.0665721
	0.53651	1.19	0.00116023	0.116023		0.402358	1.19	0.000376277	0.0376277
	0.097694	1.2	0.000928182	0.0928182		0.346541	1.2	0.000289444	0.0289444
	0.774162	1.21	0.000734811	0.0734811		0.407057	1.21	0.0002605	0.02605
	0.473465	1.22	0.000812159	0.0812159		0.520461	1.22	0.000318388	0.0318388
	0.467481	1.23	0.000696136	0.0696136		0.777357	1.23	0.000173666	0.0173666
	0.195804	1.24	0.000773485	0.0773485		0.313287	1.24	0.000173666	0.0173666
	0.151418	1.25	0.000464091	0.0464091		0.158853	1.25	0.000115778	0.0115778
	0.33001	1.26	0.000889508	0.0889508		0.572825	1.26	0.000144722	0.0144722
	0.485865	1.27	0.000696136	0.0696136		0.491445	1.27	5.78888e-05	0.00578888
	0.389207	1.28	0.000541439	0.0541439		0.476739	1.28	0.000144722	0.0144722
	0.54423	1.29	0	0		0.455331	1.29	8.68332e-05	0.00868332
	0.373319	1.3	0	0		0.366098	1.3	0.000231555	0.0231555
	0.482341	1.31	0	0		0.295246	1.31	0.000202611	0.0202611
	0.106242	1.32	0	0		0.231878	1.32	0	0
	0.516272	1.33	0	0		0.280705	1.33	0.000173666	0.0173666
	0.119999	1.34	0	0		0.277728	1.34	8.68332e-05	0.00868332
	0.267719	1.35	0	0		0.286138	1.35	5.78888e-05	0.00578888
	0.295014	1.36	0	0		0.287739	1.36	5.78888e-05	0.00578888
	0.175451	1.37	0	0		0.512661	1.37	0.000144722	0.0144722
	0.204058	1.38	0	0		0.166637	1.38	8.68332e-05	0.00868332
	0.221312	1.39	0	0		0.428547	1.39	0.000115778	0.0115778
	0.470068	1.4	0	0		0.317002	1.4	0.000115778	0.0115778
	0.397239	1.41	0	0		0.17755	1.41	5.78888e-05	0.00578888
	0.242795	1.42	0	0		0.575722	1.42	0.000231555	0.0231555
	0.379436	1.43	0	0		0.702062	1.43	0.000115778	0.0115778
	0.044952	1.44	0	0		0.0847889	1.44	0.000144722	0.0144722
	0.300086	1.45	0	0		0.24448	1.45	5.78888e-05	0.00578888
	0.611851	1.46	0	0		0.493019	1.46	0.000144722	0.0144722
	0.353083	1.47	0	0		0.397786	1.47	8.68332e-05	0.00868332
	0.308943	1.48	0	0		0.479235	1.48	0.000202611	0.0202611
	0.233133	1.49	0	0		0.406267	1.49	5.78888e-05	0.00578888
	0.159408	1.5	0	0		0.446438	1.5	8.68332e-05	0.00868332
	0.161024	1.51	0	0		0.212744	1.51	0.000115778	0.0115778
	0.191532	1.52	0	0		0.127456	1.52	5.78888e-05	0.00578888
	0.514736	1.53	0	0		0.0808025	1.53	0.000144722	0.0144722
	0.256739	1.54	0	0		0.161059	1.54	0.000115778	0.0115778
	0.169069	1.55	0	0		0.0447497	1.55	8.68332e-05	0.00868332
	0.113236	1.56	0	0		0.273063	1.56	0.000115778	0.0115778
	0.180203	1.57	0	0		0.310414	1.57	0.000144722	0.0144722
	0.182267	1.58	0	0		0.210936	1.58	8.68332e-05	0.00868332
	0.149848	1.59	0	0		0.357583	1.59	8.68332e-05	0.00868332
	0.377765	1.6	0	0		0.643448	1.6	8.68332e-05	0.00868332
	0.597913					0.409433
	0.181856					0.124094
	0.203295					0.294562
	0.232729					0.393357
	0.0958231					0.191422
	0.319954					0.288261
	0.128399					0.348446
	0.575166					0.187487
	0.42151					0.427153
	0.228204					0.496819
	0.151942					0.316667
	0.365299					0.0264412
	0.415438					0.441676
	0.318342					0.0599961
	0.280831					0.744088
	0.219299					0.223866
	0.184651					0.504596
	0.272815					0.391127
	0.330897					0.942114
	1.01156					0.690277
	0.269955					0.321881
	0.240618					0.459082
	0.282435					0.100739
	0.503248					0.633965
	0.744363					0.321062
	0.278532					0.611687
	0.354944					0.680834
	0.46106					0.429837
	0.360351					0.583269
	0.369287					0.617234
	0.34443					0.607204
	0.484358					0.815803
	0.595525					0.339455
	0.0673151					0.133093
	0.523533					0.300026
	0.436924					0.3415
	0.371613					0.250182
	0.261923					0.442559
	0.235096					0.651195
	0.249638					1.35555
	0.109815					0.287667
	0.825869					1.05038
	0.157397					0.45631
	0.433741					0.202346
	0.116445					0.176539
	0.414613					0.689803
	0.093292					0.172267
	0.134167					0.884711
	0.111191					0.216984
	0.126635					0.645266
	0.0645661					0.0691765
	0.240195					0.278026
	0.108552					0.1169
	0.142435					0.315825
	0.10495					0.901072
	0.378862					0.556299
	0.532014					0.20904
	1.02792					0.199741
	0.185577					0.0785143
	0.0689126					0.173604
	0.49293					0.571847
	0.0841353					0.226314
	0.518557					0.396516
	0.114208					0.530969
	0.130411					0.232268
	0.327144					0.304449
	0.0393059					0.500164
	0.0878563					0.757419
	0.0843506					0.246231
	1.01286					0.306247
	0.648409					0.0385811
	0.0954338					0.113677
	0.155476					0.614972
	0.55218					0.295509
	0.128326					0.156985
	0.489543					0.269613
	0.0895668					0.158743
	0.0824338					0.487959
	0.234314					0.218625
	0.429667					0.27138
	0.0192295					0.348424
	0.144893					0.220842
	0.227342					0.38725
	0.178316					0.17237
	0.150852					0.556442
	0.221475					0.267206
	0.225562					0.152244
	0.287013					0.239292
	0.335325					0.686139
	0.260591					0.539184
	1.13107					0.0984551
	0.219317					0.523064
	0.0531366					0.703005
	0.127182					0.139154
	0.704955					0.431251
	0.346076					1.30117
	0.720108					0.644956
	0.0700602					0.0732994
	0.212306					0.386605
	1.20441					0.422822
	0.929584					0.217497
	0.117874					0.358945
	0.302324					0.256234
	0.720305					0.571326
	0.590586					0.471423
	0.50489					0.69951
	0.546221					0.810395
	0.350789					0.673925
	0.204461					0.23752
	0.154424					0.297358
	0.28699					0.213048
	0.666017					0.491697
	0.379827					0.565317
	0.566546					0.197445
	0.563878					0.373243
	0.431127					0.132614
	0.515912					0.381015
	0.120366					0.203671
	0.126193					0.513393
	0.498627					0.432236
	0.24411					0.512401
	0.26653					0.278816
	0.328578					0.582534
	0.28994					0.777172
	0.418282					0.162476
	0.129564					0.267802
	0.313892					0.131522
	0.310365					0.284647
	0.206501					0.490295
	0.421759					0.573408
	0.302254					0.374648
	0.496214					0.359194
	0.45414					0.188202
	1.0853					0.255235
	0.319745					0.169082
	0.251498					0.380146
	0.407777					1.53859
	0.353889					0.119589
	0.133255					0.319368
	0.270892					0.327867
	0.627716					0.828179
	0.223425					0.0878238
	0.423708					0.283306
	0.188049					0.537154
	0.455004					0.0753782
	0.473592					0.271643
	0.237218					0.111241
	0.90427					0.375725
	0.557793					0.176011
	0.639603					0.529339
	0.313175					0.380366
	0.552837					0.263245
	0.0938949					0.44948
	0.323852					0.710362
	0.787324					0.214058
	0.517578					0.209781
	0.436832					0.787665
	0.319655					0.33842
	0.102223					0.502421
	0.336937					0.490447
	0.273042					0.235713
	0.218333					0.326236
	0.541228					0.194621
	0.20615					0.23256
	0.116758					0.333614
	0.282713					0.198482
	0.385738					0.480918
	0.405921					0.440414
	0.168					0.257622
	0.43868					0.228544
	0.564181					0.43026
	0.366855					0.350126
	0.211314					0.152526
	0.675626					0.248614
	0.279016					0.150804
	0.344587					0.205696
	0					0.141672
	0.197539					0.179948
	0.648114					0.575521
	0.416494					0.40863
	0.1424					0.252901
	0.19361					0.542683
	0.112362					0.270741
	0.306363					0.393065
	0.14484					0.384949
	0.389122					0.408005
	0.133441					0.294058
	0.380466					0.172171
	0.349292					0.432834
	0.344874					0.0764368
	0.156673					0.535544
	0.394708					0.562102
	0.273644					0.154811
	1.20426					0.255344
	0.168751					0.320035
	0.523953					0.132891
	0.257084					0.166955
	0.0548961					0.176566
	0.138434					0.866758
	0.232646					0.811015
	0.258168					0.271041
	0.229718					0.12436
	0.147064					0.0858833
	0.0109676					0.517411
	0.207552					0.262447
	0.626179					0.150493
	0.267367					0.598385
	0.994682					0.295809
	0.304194					0.492129
	0.30316					0.913076
	0.168466					0.501381
	0.494034					0.376061
	0.281212					0.331103
	0.278402					0.233124
	0.595266					0.907358
	0.0968162					0.110315
	0.211906					0.161933
	0.154725					0.379759
	0.179656					0.446065
	0.657316					0.250636
	0.401812					0.238884
	0.499277					0.390582
	0.215063					0.706026
	0.755715					0.517185
	0.254401					0.299142
	0.84286					0.285957
	0.296856					0.281555
	0.514122					0.164205
	0.265527					0.568863
	0.300713					0.135682
	0.9462					0.219111
	0.18415					0.778761
	0.153539					0.124472
	0.147524					0.247381
	0.226926					0.281509
	0.975642					0.365231
	0.122128					0.370061
	0.267479					0.19058
	0.466848					0.0988369
	0.622103					0.175841
	0.257466					0.267533
	0.363783					0.329353
	0.309276					0.101167
	0.50246					0.223334
	0.163862					0.507187
	0.338912					0.600115
	0.244537					0.187489
	0.543379					0.204255
	0.428534					0.0648718
	0.520046					0.324144
	0.446984					0.320253
	0.265087					0.0983714
	0					0.217219
	0.762215					0.56691
	0.195814					0.185118
	0.0783159					0.242441
	0.545376					0.259519
	0.0712795					0.569269
	0.56936					0.34434
	0.10782					0.396924
	0.594714					0.411061
	0.269237					0.0586111
	0.118624					0.310557
	0.413289					0.376731
	0.296678					0.256964
	0.158102					0.232653
	0.265693					0.440326
	0.258329					0.765222
	0.187477					0.349708
	0.250291					0.406008
	1.06886					0.238174
	0.445856					0.353695
	0.790219					0.402539
	0.279773					0.161344
	0.738062					0.297503
	0.985087					0.405153
	0.642684					0.394621
	0.412344					0.598962
	0.329085					0.316171
	0.494566					0.512694
	0.18938					0.522427
	0.408697					0.611264
	0.126355					0.353454
	0.236045					0.699282
	0.839712					0.209771
	0.197799					0.444548
	0.628788					0.318692
	0.187973					0.239798
	0.205189					0.442871
	0.489788					0.370598
	0.0730643					0.285965
	0.814568					0.285721
	0.577847					0.167847
	0.170181					0.235717
	0.256798					0.208798
	0.40297					0.277862
	0.383098					0.462619
	0.1461					0.0448593
	0.409032					0.297427
	0.0717497					0.317681
	0.310882					0.242285
	0.330771					0.794474
	0.380572					0.388942
	0.260704					0.215856
	0.458223					0.274039
	0.295012					0.182707
	0.598699					0.465187
	0.393386					0.238723
	0.429767					0.0677698
	0.420915					0.20673
	0.749					0.226438
	0					0.112969
	0.835231					0.906828
	0.478195					0.347176
	0.20588					0.182423
	0.245648					0.343586
	0.399289					0.482859
	0.097576					0.229933
	0.307858					0.448544
	0.825627					0.438574
	0.0786111					0.102809
	0.151517					0.459077
	0.470161					0.189674
	0.170218					0.43804
	0.600171					0.925179
	0.47221					0.279072
	0.0338875					0.102727
	1.17051					0.0784831
	0.12259					0.37954
	0.236934					0.248127
	0.24367					0.464563
	0.176624					0.0831751
	0.0478451					0.424653
	0.229657					0.407913
	0.200272					0.935088
	0.474409					0.0972715
	0.449099					0.656475
	0.416844					0.901185
	0.295189					0.292017
	0.286971					0.267693
	0.0218768					0.187046
	0.834826					0.600256
	0.12585					0.440877
	0.605319					0.402107
	0.0942774					0.330497
	0.499409					0.0744375
	0.474762					0.290992
	0.275352					0.545647
	0.069894					0.188506
	0.300611					0.42212
	0.394115					0.500166
	0.120801					0.42271
	0.489268					0.0593359
	0.254777					0.497346
	0.510476					0.593071
	0.1626					0.247569
	0.470491					0.151354
	0.397577					1.30704
	0.264636					0.269396
	0.1243					0.46136
	0.193552					0.5539
	0.679005					0.434322
	0.885589					0.140879
	0.527082					0.630306
	0.300215					0.217674
	0.387526					0.298633
	0.47242					0.158622
	0.195646					0.267588
	1.26328					0.350329
	0.362732					1.43748
	0.341018					0.344839
	0.492484					0.0407913
	0.329734					0.4072
	0.352179					0.130583
	0.642993					0.39011
	0.694793					0.423431
	0.0935623					0.333235
	0.723253					0.609752
	0.146263					0.45863
	0.327862					0.298848
	0.298728					0.469699
	0.0829322					0.262078
	0.404196					0.302812
	0.846412					0.240735
	0.307791					0.523379
	0.690894					0.644317
	0.729873					0.0378226
	0.0403926					0.197032
	0.034916					0.269547
	0.0998366					0.0495714
	0.335656					0.406851
	0.313796					0.439008
	0.410795					0.514123
	1.04365					0.330644
	0.174313					0.2244
	0.203549					0.333267
	0.156693					0.22021
	0.304433					0.0998523
	0.597159					0.315049
	0.320923					0.443505
	0.101519					0.208114
	0.639149					0.505864
	0.608442					0.217724
	0.256245					0.430873
	0.501967					0.707582
	0.953193					0.601537
	0.467211					0.487489
	0.442832					0.635653
	0.539965					1.06334
	0.207647					0.312886
	0.508513					0.337225
	0.419959					0.499278
	0.390037					0.252789
	0.220027					0.402129
	0.262541					0.2916
	0.409125					0.783104
	0.133025					0.322532
	0.444657					0.36249
	0.54023					0.308618
	0.374359					0.606128
	0.131034					0.489171
	0.173691					0.767379
	0.55987					0.674848
	0.161354					0.266441
	0.257778					0.0556952
	0.689054					0.345219
	0.358582					0.214483
	0.537189					0.197789
	0.793126					0.40191
	0.148566					0.394978
	0.377091					0.371727
	0.948139					0.241273
	0.397211					0.281689
	0.203514					0.205515
	0.249157					0.400362
	0.333815					0.467897
	0.177112					0.521922
	0.801403					0.706216
	0.281543					0.946818
	0.538144					0.0831135
	0.271946					0.952778
	0.260932					0.237158
	0.581079					0.407163
	0.664981					0.896559
	0.342781					0.162505
	0.638737					0.396445
	0.719655					0.453589
	0.453111					0.884578
	0.544691					0.182438
	0.562025					0.276623
	0.31432					0.129574
	0.523898					0.440494
	0.0581246					0.101074
	0.741149					0.619779
	0.218129					0.217924
	0.611407					0.206981
	0.168085					0.496395
	0.047024					0.618967
	0.359924					0.153907
	0.110525					0.661817
	0.482479					0.711629
	0.360126					0.684637
	0.24986					0.260857
	0.332743					0.241386
	0.290193					0.764507
	0.303135					0.602117
	0.0445147					0.405747
	0.324463					0.627882
	0.615423					0.0671742
	0.322693					0.24365
	0.334879					0.217654
	0.243431					0.521733
	0.158123					0.493197
	0.366586					0.226984
	0.299238					0.347916
	0.349069					0.606799
	0.317651					0.500728
	0.236187					0.36601
	0.456898					0.706345
	0.482809					0.140996
	0.329206					0.318526
	0.434117					0.131504
	0.4989					0.566411
	0.270035					0.562916
	0.237864					0.275266
	0.343071					0.0324199
	0.335809					0.297683
	0.133803					0.214664
	0.142738					0.664154
	0.22776					0.274432
	0.119595					0.287171
	0.253985					0.300809
	0.399117					0.179047
	0.241845					0.0837051
	0.0884948					0.626886
	0.0847214					0.670726
	0.0833003					0.300119
	0.155913					0.146749
	0.463812					0.625966
	0.295658					0.438119
	0.322544					0.443814
	0.45126					0.163515
	0.357968					0.285331
	0.659267					0.260006
	0.359952					0.130594
	0.362142					0.236045
	0.154284					0.3016
	0.64151					0.274631
	0.142922					0.0390691
	0.580111					0.297553
	0.480622					0.14288
	0.299693					0.705573
	0.127754					0.047003
	0.183443					1.10964
	0.248923					0.150802
	0.325134					0.205561
	0.141028					0.637466
	0.470795					0.233673
	0.30055					0.819985
	0.197105					0.360648
	0.300001					0.766023
	0.473421					0.20145
	0.729716					1.04011
	0.332134					0.102222
	0.243996					0.117173
	0.409312					0.231164
	0.267887					0.228584
	0.177839					0.373009
	0.193017					0.0335307
	0.164782					0.239259
	0.24643					0.338073
	0.196762					0.239259
	0.406596					0.312594
	0.2877					0.641027
	0.232777					0.623836
	0.140617					0.290465
	0.524882					0.459343
	0.566846					0.383184
	0.0823562					0.449592
	0.339722					0.464854
	0.282095					0.67265
	0.414335					0.439559
	0.66907					0.14941
	1.08262					0.545497
	0.667464					0.484695
	0.44817					0.226275
	0.0262651					0.343437
	0.614211					0.141327
	0.0583697					0.509056
	0.619756					0.439379
	0.367772					0.30988
	0.173193					0.417514
	0.221963					1.15832
	0.303353					0.584949
	0.0742642					0.911834
	0.486731					0.231269
	0.913065					0.381534
	0.542758					0.306242
	0.209499					0.544565
	0.362817					0.131899
	0.30203					0.671934
	0.366025					0.61242
	0.174186					0.570306
	0.0417458					0.765518
	0.0304527					0.244746
	0.241388					0.391562
	0.304438					0.726683
	0.231755					0.213994
	0.173241					0.546298
	0.243114					0.236754
	1.0504					0.225329
	0.0784169					0.745061
	0.313748					0.201017
	0.336359					0.482959
	0.051228					0.8436
	0.262733					1.26161
	0.0493458					0.693073
	0.432576					0.662681
	0.207761					0.313953
	0.0600615					0.498126
	0.213123					0.500677
	0.674951					0.590245
	0.239112					0.348503
	0.12457					0.791214
	0.299461					0.55354
	0.0926979					0.278956
	0.100888					0.316416
	0.1713					0.794861
	0.373146					0.133975
	0.425223					0.287142
	0.27672					0.228476
	0.490677					0.609021
	0.578941					0.151023
	0.171661					0.222102
	0.219798					0.884398
	0.199888					0.0886936
	0.0961396					0.634957
	0.129623					0.0683526
	0.19804					0.193629
	0.348786					0.500345
	0.363866					0.0639399
	0.458237					0.231518
	0.164377					0.0480802
	0.14337					0.718372
	0.369867					0.901721
	0.207468					0.148119
	0.122572					0.172716
	0.735818					0.650431
	0.973148					0.312547
	0.144749					0.243868
	0.340441					0.170511
	0.448902					0.486015
	0.688346					0.435296
	0.0799379					0.558243
	0.305741					0.479823
	0.149559					0.26019
	0.200827					0.218527
	0.281248					0.415327
	0.939838					0.206978
	0.219409					0.104327
	0.0799939					0.330428
	0.61464					0.408485
	0.574907					0.364666
	0.342943					0.124866
	0.127714					0.102508
	0.377704					0.141559
	0.580576					0.343998
	0.835463					0.1639
	0.338602					0.21956
	0.283938					0.429989
	0.451596					0.198519
	0.310462					0.241207
	0.274768					0.409507
	0.162544					0.487833
	0.200007					0.134937
	0.0989788					0.194955
	0.266028					0.429378
	0.571302					0.360776
	0.476086					0.348572
	0.504417					0.227693
	0.668123					0.244919
	0.269894					0.458343
	0.300835					0.274783
	0.260422					0.519798
	0.100631					0.47657
	0.177366					0.359667
	0.875074					0.432962
	0.182975					0.319729
	0.311591					0.530945
	0.128922					0.298057
	0.248471					0.334001
	0.358824					0.366988
	0.214758					0.534746
	0.146676					0.231439
	0.332789					0.354834
	0.251234					0.507925
	0.0328092					0.327743
	0.129491					0.408661
	0.282172					0.31339
	0.194535					0.40527
	0.0751953					0.270425
	0.0729631					0.17055
	0.415209					0.756449
	0.074785					0.311982
	0.109472					0.156487
	0.182875					0.237956
	0.159044					0.1145
	0.560425					0.298541
	0.355535					0.499036
	0.529789					0.239959
	0.113883					0.976681
	0.425422					0.075074
	0.636388					0.285729
	0.618326					0.489971
	0.129512					0.671718
	0.800892					0.244244
	0.101715					0.55577
	0.190626					0.473845
	0.460039					0.407701
	0.0405446					0.701375
	0.339386					0.473494
	0.563173					0.505975
	0.625397					0.465524
	0.12177					0.717427
	0.277534					0.322034
	0.275799					0.396262
	0.408265					0.383885
	0.393766					0.138881
	0.176848					0.204734
	0.353714					0.367058
	0.77561					0.657032
	0.969114					0.635309
	0.377906					0.279581
	0.406684					0.869174
	0.567644					0.779374
	0.702652					0.832988
	0.82887					0.712849
	0.28989					0.490924
	0.129092					0.351785
	0.43461					0.403225
	0.245139					0.423303
	0.2386					0.20689
	0.239855					0.352263
	0.12476					0.305651
	0.599046					0.81826
	0.467925					0.14577
	0.172273					0.113556
	0.459189					0.552711
	0.600782					0.283718
	0.137162					0.310257
	0.0610168					0.229664
	0.415243					0.50806
	0.131107					0.602493
	0.0498997					0.493251
	0.248602					0.482641
	0.368902					0.451572
	0.342028					0.846458
	0.524463					0.268428
	0.215592					0.230546
	1.26486					0.365435
	0.389417					0.906073
	0.223784					0.523292
	0.79001					0.16825
	0.492214					0.150602
	0.30905					0.452918
	0.41056					0.0402509
	0.373606					0.0727422
	0.279371					0.256676
	0.389826					0.263742
	0.331324					0.109646
	0.319048					0.210496
	0.130481					0.192391
	0.546958					0.0809165
	0.1339					0.79245
	0.0480994					0.538092
	0.0373454					0.342461
	0.313972					0.629415
	0.460121					0.235195
	0.132454					0.788574
	0.315782					1.33886
	0.352867					0.450976
	0.274516					1.15686
	0.188733					0.34109
	0.401689					0.447134
	0.340365					0.27074
	0.0599891					0.284915
	0.404966					0.449917
	0.45258					0.055143
	0.244937					0.929873
	0.474145					0.223361
	0.304843					0.591102
	0.134543					0.0971751
	0.21043					0.173977
	0.626384					1.05745
	0.254957					0.481487
	0.210006					1.02539
	1.21372					0.265925
	0.273586					0.257377
	0.196088					0.256189
	0.137878					0.345435
	0.286152					0.0644734
	0.23148					0.435459
	0.147424					0.298937
	0.30404					0.612508
	0.160844					0.17101
	0.29431					0.285255
	0.501802					0.523716
	0.177947					0.549743
	0.35842					0.880345
	0.304092					0.184243
	0.0190548					0.529418
	0.375076					0.34483
	0.15867					0.329862
	0.125677					0.565729
	0.321179					0.11986
	0.430388					0.201376
	0.106286					0.153489
	0.161392					0.478554
	0.392283					0.606865
	0.32303					0.665856
	0.371773					0.744269
	0.231775					0.865458
	0.321425					0.813995
	0.193887					0.621669
	0.283503					0.403877
	0.17878					0.0850368
	0.790333					0.516391
	0.0102679					0.222961
	0.435832					0.443148
	0.400726					0.213632
	0.544382					0.614281
	0.385629					0.100236
	0.684263					0.347444
	0.193257					0.117559
	0.123533					0.0881045
	0.0544091					0.743006
	0.221533					0.399116
	0.284196					0.280527
	0.332373					0.238354
	0.174125					0.144458
	0.0585837					0.716349
	0.0955223					0.64875
	0.055374					0.860277
	0.243722					0.742174
	0.301733					0.346861
	0.520967					0.296983
	0.0724867					0.79399
	0.127081					0.305615
	0.0423948					0.112723
	0.197715					0.27875
	0.344856					1.03388
	0.19547					0.520506
	0.224575					0.321
	0.118673					0.214
	0.143884					0.217865
	0.312825					0.145748
	0.410813					0.285818
	0.570115					0.190844
	0.357115					0.194428
	0.221572					0.367506
	0.23342					0.725771
	0.943234					0.413213
	0.137393					0.136952
	0.343705					0.0857876
	0.127039					0.191126
	0.182281					0.821567
	0.496687					0.74531
	0.266537					0.0756745
	0.148183					0.46327
	0.239188					0.433342
	0.117918					0.604373
	0.429748					0.230516
	0.224798					0.254013
	0.731507					0.695376
	0.313353					0.651487
	0.244055					0.110229
	0.877824					0.412011
	0.457681					0.224737
	0.433136					0.604541
	0.456896					0.49493
	1.15011					0.298841
	0.608374					0.714583
	0.87358					0.590336
	0.455868					0.57153
	0.445096					0.473115
	0.1546					0.408986
	0.29649					0.155228
	0.0675328					1.24002
	0.400478					0.305197
	0.185574					0.373723
	0.205879					0.493165
	0.0866035					0.253145
	0.174367					0.479955
	0.889743					0.173204
	0.0733691					0.364799
	0.728336					0.530067
	0.274351					0.355
	0.45837					0.233604
	0.43147					0.413112
	0.177383					0.362505
	0.605167					0.25608
	0.926746					0.3084
	0.164834					0.36069
	0.304793					0.331499
	0.391789					0.315739
	1.12103					0.980085
	0.189009					0.455908
	0.349361					0.272679
	0.579652					0.518546
	0.347758					0.115076
	0.530047					0.741779
	1.01368					0.102572
	0.508207					0.326765
	0.59965					0.372948
	0.147852					0.389031
	0.278289					0.739237
	0.440828					0.0721322
	1.1661					0.603134
	0.525254					0.656172
	0.435321					1.07289
	0.393515					0.766222
	0.459183					0.344182
	0.330245					0.478167
	0.456815					0.460471
	0.199991					0.309105
	0.169865					0.608483
	0.325872					0.383498
	0.36751					0.192927
	0.281539					0.253769
	0.348044					0.261009
	0.379895					0.239618
	0.265848					0.405692
	0.240843					0.942876
	0.532759					0.462915
	0.0408241					0.209359
	0.146675					0.280338
	0.306791					0.16319
	0.443878					0.509408
	0.450487					0.518951
	0.128712					0.322375
	0.573848					0.398887
	0.391055					0.426088
	0.40367					0.174351
	0.361254					0.455993
	0.663944					0.176272
	0.367319					0.132183
	0.147032					0.412457
	0.192783					0.361131
	0.344831					0.373267
	0.314186					0.0746753
	0.0567388					0.325258
	0.122541					0.748389
	0.450674					0.200623
	0.0177779					0.372863
	0.573126					0.396914
	0.49846					0.174376
	0.371579					0.432365
	0.487767					0.364298
	0.199414					0.0400591
	0.171027					0.223512
	1.19326					0.205476
	1.04571					0.262248
	0.112609					0.558764
	0.259501					0.388273
	0.253429					0.503153
	0.290005					0.283358
	0.530116					0.836658
	0.258912					0.317485
	0.206968					0.520193
	0.447923					0.32214
	0.352681					0.321596
	0.514101					0.0408667
	0.543202					0.238405
	0.183013					0.0469783
	0.591475					0.235889
	0.190358					0.798085
	0.141305					0.498167
	0.162487					0.207512
	0.33646					0.920131
	0.0964259					1.06461
	0.393015					0.155342
	0.0180371					0.373104
	0.229713					0.325282
	0.138189					0.211863
	0.425264					0.495015
	0.162369					0.358492
	0.476649					0.184433
	0.28757					0.835206
	0.428					0.433036
	0.535					0.13618
	0.133756					0.393409
	0.370623					0.252383
	0.593139					0.577828
	0.282398					0.577429
	0.473543					0.720613
	0.581814					0.0923154
	0.0645085					0.543693
	0.293223					0.564586
	0.13845					1.17743
	0.0464229					0.557337
	0.0632119					0.142398
	0.190799					0.18695
	0.228236					0.317294
	0.381756					0.34446
	0.21969					0.225433
	0.153758					0.138137
	0.108429					0.401082
	0.13714					0.228924
	0.186908					0.106207
	0.650144					0.346293
	0.225727					0.534659
	0.359929					0.486429
	0.133751					0.0846519
	0.172467					0.200713
	0.661018					0.452465
	0.196558					0.561142
	0.490577					0.415733
	0.393441					0.0851625
	0.257093					0.22214
	0.52895					0.0491243
	0.558353					0.307944
	1.17065					0.232137
	0.482466					0.216112
	0.16051					0.408441
	0.606912					0.446861
	0.426074					0.558032
	0.125658					0.516414
	0.538252					0.286008
	0.0421381					0.521693
	0.153525					0.640667
	0.756438					0.962171
	0.214938					0.0476777
	0.235533					0.474242
	0.508818					0.854029
	0.464464					0.570234
	0.454551					0.351539
	0.354913					0.599031
	0.452339					0.267455
	0.192841					0.639266
	0.169699					0.410441
	0.596515					0.297559
	0.108579					0.395665
	0.143759					0.420406
	0.159775					0.395754
	0.42102					0.3586
	0.0849823					0.147531
	1.02725					0.330298
	1.20526					0.252352
	0.369842					0.243166
	0.214					0.0785094
	0.214					0.0625697
	0.173157					0.616021
	1.06858					0.175652
	0.126294					0.208933
	0.669816					0.232804
	0.670995					0.120676
	0.992082					0.160625
	0.474857					0.394007
	0.309539					0.249043
	0.550634					0.383274
	0.342855					0.751636
	0.366285					0.102216
	1.04937					0.278305
	0.270554					0.360993
	0.404395					0.353995
	0.333894					0.384521
	0.474559					0.402488
	0.493122					0.112003
	0.130898					0.228169
	1.11502					0.557354
	0.183337					0.485932
	0.223708					0.450001
	0.253418					0.262067
	0.0402318					0.198143
	0.246239					0.0619087
	0.342479					0.535432
	0.105608					0.377121
	0.195773					0.23802
	0.270928					0.906386
	0.259349					0.403035
	0.335904					0.380444
	0.182699					0.334426
	0.20017					0.0871564
	0.519433					0.0875532
	0.589749					0.27879
	0.287612					0.051403
	1.19752					0.56759
	0.204063					0.642485
	0.107					0.476382
	0.546129					0.0668225
	0.483978					0.332955
	0.588149					0.186409
	0.631328					0.339739
	0.768871					0.318755
	0.22563					0.291523
	0.74872					0.104504
	0.606451					0.270161
	0.625078					0.555647
	0.798987					0.691081
	0.148827					0.301095
	0.0604246					0.605044
	0.691992					0.180378
	0.650267					0.780681
	0.110549					0.613846
	0.295678					0.311546
	0.0991061					0.262155
	0.21585					0.483477
	0.140303					0.798196
	0.94028					0.314471
	0.15454					0.618712
	0.491607					0.255211
	0.648036					0.252954
	0.870076					0.493904
	0.811213					0.171973
	0.0435076					0.456279
	0.414756					0.404969
	0.360906					0.284254
	0.330605					0.120283
	0.303774					0.0470485
	0.357882					0.440582
	0.197428					0.488662
	0.412319					0.269853
	0.184462					0.653524
	0.293914					0.297623
	0.500531					0.636446
	0.684148					0.585963
	0.289872					0.228554
	0.311909					0.507449
	1.16135					0.162216
	0.533363					0.458942
	0.694581					0.25009
	0.470584					0.33604
	0.272125					0.751337
	0.13749					0.221654
	0.318036					0.562817
	0.135125					0.142068
	0.332794					0.49207
	0.409389					0.233434
	0.193847					0.645736
	0.256184					0.586115
	0.11657					0.256041
	0.0849516					0.191964
	0.211552					0.2548
	0.716652					0.530312
	0.277422					0.11691
	0.0639358					0.526889
	0.625079					0.216106
	0.310149					0.686005
	0.207212					0.347459
	0.527607					1.60325
	0.394895					0.19402
	0.180244					0.296551
	0.282581					0.310332
	0.442195					0.13967
	1.00352					0.165575
	0.248911					0.324205
	0.25705					0.182866
	0.194366					0.312281
	0.177836					0.654595
	0.250639					0.384252
	0.216085					0.608024
	0.423273					0.0762049
	0.500266					0.38494
	0.416961					0.446275
	0.197041					0.305072
	0.0128122					0.626786
	0.0225008					0.474525
	0.675289					0.490554
	0.511751					0.352582
	0.110916					0.448315
	0.299286					0.673658
	0.231011					0.573865
	0.366108					0.254751
	0.257475					0.16087
	0.0772594					0.34442
	0.232609					0.29771
	0.421939					0.0952957
	0.0804694					0.263504
	0.211217					0.213608
	0.170448					0.832153
	0.370269					0.586731
	0.439384					0.118122
	0.0693041					0.31791
	0.230379					0.407531
	0.481232					0.518606
	0.108297					0.505135
	0.366359					0.217581
	0.813943					0.189726
	0.123697					0.934779
	0.559121					0.164825
	0.165605					0.410106
	0.708409					0.293467
	0.529293					0.185582
	0.38162					0.394757
	0.353809					0.17155
	0.437522					0.560006
	0.183838					0.373285
	0.209011					0.455881
	0.484505					0.420131
	0.198099					0.455307
	0.323786					0.328031
	0.304885					0.503714
	0.427783					0.406971
	0.681621					0.0954778
	0.341592					0.370992
	0.718218					0.340118
	0.31442					0.577007
	0.625436					0.617129
	0.332155					0.172956
	0.273525					0.624032
	0.576207					0.314081
	0.358494					0.230319
	0.17677					0.423771
	0.282004					0.528176
	0.595901					0.337749
	0.187522					0.521787
	0.166144					0.420216
	0.186905					0.295135
	0.360733					0.682068
	0.324106					0.134739
	0.213927					0.185441
	0.00627353					0.106976
	0.150244					0.269183
	0.0416519					0.926666
	0.953962					0.425678
	0.128838					0.261657
	0.0782595					0.421091
	0.714397					0.0846962
	0.148857					0.923803
	0.301459					0.773776
	0.310177					0.156964
	0.374566					0.0406774
	0.19969					0.62525
	0.292246					0.174508
	0.385629					0.633244
	0.500671					0.215592
	0.534423					0.428849
	0.171995					0.177245
	0.620159					0.954674
	0.0288378					0.458438
	0.380755					0.559122
	0.183678					0.575668
	0.099361					0.772056
	0.146031					0.379367
	0.296306					0.242782
	0.384679					0.577324
	0.17563					0.787947
	0.288494					0.326466
	0.203555					0.323279
	0.237325					0.10978
	0.153413					0.528484
	0.0892934					0.762516
	0.0379246					0.532035
	0.213484					0.217086
	0.223149					0.361302
	0.269666					0.393408
	0.173733					0.828244
	0.310816					0.124369
	0.24531					0.458185
	0.784703					0.429574
	0.585391					0.424471
	0.231342					0.539129
	0.965317					0.377645
	0.411304					0.405587
	0.278959					0.690775
	0.30513					0.1919
	0.221145					0.213234
	0.377227					0.681747
	0.20286					0.384651
	0.349035					0.479436
	0.235383					0.208865
	0.535					0.0275328
	0.214					0.093811
	0.283143					0.704486
	0.423723					0.43626
	0.143983					0.395655
	0.140741					0.267916
	0.333811					0.238849
	0.285331					0.293444
	0.245421					0.402365
	0.19803					0.369424
	0.432601					0.539419
	0.369707					0.275751
	0.138202					0.248893
	0.289893					0.507357
	0.268884					0.10913
	0.221371					0.182817
	0.122362					0.067804
	0.299352					0.508541
	0.550723					0.434417
	0.224636					0.461958
	0.202498					0.461098
	0.139714					0.419314
	0.250282					0.228981
	0.394014					0.619442
	0.147218					0.344511
	0.269466					0.2045
	0.120558					0.276425
	0.82677					0.0971033
	0.378538					0.281983
	0.234079					0.795425
	0.418278					0.385108
	0.111727					0.876649
	0.0365509					0.33743
	0.205711					0.529944
	0.27561					0.604387
	0.400959					0.042312
	0.361356					0.411595
	0.426542					0.278622
	0.198882					0.686821
	0.395297					0.649946
	0.215713					0.109165
	0.378506					0.306419
	0.320329					0.544155
	0.354377					0.382801
	0.26825					0.506399
	0.161425					0.448928
	0.558737					0.591933
	0.342978					0.290244
	0.409903					0.0649038
	0.158291					0.228523
	0.457927					0.722823
	0.125942					0.574634
	0.0993142					0.153819
	0.344094					0.459774
	0.212702					0.519502
	0.0558814					1.11379
	0.722804					0.712682
	0.106837					0.659036
	0.301148					0.296982
	0.264764					0.455895
	0.265442					0.722733
	0.379805					0.284862
	0.086459					1.05097
	0.110927					0.755797
	0.101867					0.245973
	0.106781					0.931054
	0.215544					0.0876778
	0.724726					0.439001
	0.201291					0.667511
	0.316895					0.363468
	0.394627					0.352992
	0.809753					0.62648
	0.404449					0.148834
	0.247887					0.234477
	0.139948					0.084325
	0.482008					0.154775
	0.156864					0.276288
	0.583676					0.346899
	0.704237					0.312516
	0.225405					0.437766
	0.357449					0.499226
	0.295216					0.172357
	0.177642					0.180147
	0.140422					0.168818
	0.200792					0.200018
	0.205244					0.291843
	0.421095					0.854428
	0.546659					0.26628
	0.152243					0.12195
	0.0979434					0.208569
	0.459573					0.413684
	0.060643					0.806608
	0.094425					0.0724835
	0.67456					1.10849
	0.243431					0.227024
	0.0325959					0.400511
	0.393099					0.381334
	0.131027					0.388917
	0.262493					0.417834
	0.267234					0.419198
	0.417221					0.136246
	0.234421					0.15969
	0.193721					0.329831
	0.374583					0.158542
	0.367291					0.715326
	0.185023					0.255057
	0.830272					0.520545
	0.265206					0.211523
	0.987498					0.411666
	1.08293					0.40017
	0.079774					0.443041
	0.578117					0.601685
	0.230263					0.509044
	0.228374					0.117662
	0.215132					0.0261968
	0.303084					0.199272
	0.864668					0.523552
	0.369177					0.571476
	0.191239					0.356802
	0.431057					0.290854
	0.494524					0.488742
	1.21751					0.375835
	0.362863					0.10437
	0.721477					0.708181
	0.223201					0.298582
	0.153257					0.369495
	0.319685					0.188826
	0.167168					0.239913
	0.747599					0.607124
	0.208582					0.576569
	0.20951					0.725411
	0.205664					0.902967
	0.423596					0.330924
	0.296051					0.509673
	0.214					0.449426
	0.0408658					0.357285
	0.286315					0.175262
	0.179401					0.529484
	0.2125					0.381847
	0.290399					0.487232
	0.411109					0.126981
	0.17456					0.320937
	0.686588					0.105439
	0.368625					0.460063
	1.08563					0.232665
	0.406394					0.317229
	0.413649					0.233564
	0.557392					0.408175
	0.356706					0.218993
	0.259511					0.297697
	0.61638					0.299571
	0.317444					0.540477
	0.538558					0.487461
	0.349458					0.12203
	0.0485446					0.528241
	0.325525					0.637802
	0.260152					0.456483
	0.309598					0.645868
	0.146259					0.0777762
	0.374124					0.206332
	0.269703					0.336475
	0.502932					0.293947
	0.247905					0.358177
	0.132268					0.261321
	0.648732					0.587926
	0.241101					0.395426
	0.216368					0.406189
	0.265484					0.366073
	0.852772					0.348887
	0.580249					0.382005
	0.246721					0.183474
	0.174951					0.333528
	0.24308					0.648738
	0.389068					0.50935
	0.359482					0.146404
	0.113401					0.640085
	0.260112					1.12892
	0.252862					0.224775
	0.346232					0.407652
	0.147118					0.979836
	0.350927					0.171293
	0.0937205					0.407362
	0.39749					0.580284
	0.160941					0.197914
	0.335391					0.61158
	0.135495					0.58963
	0.408178					0.243237
	0.0309346					0.323114
	0.286256					0.384215
	1.13109					0.443579
	0.174746					0.46484
	0.392524					0.32465
	0.140781					0.974432
	0.250827					0.48498
	0.214111					0.232333
	0.217264					0.295665
	0.218136					0.704231
	0.520246					0.561777
	0.197068					0.59648
	0.689394					0.323811
	1.20146					0.311869
	0.0953284					0.503359
	0.293426					1.03358
	0.407565					0.479534
	0.039243					0.733151
	0.531143					0.57715
	0.223248					1.08331
	0.0704351					0.382606
	0.0944482					0.439897
	0.239691					0.436337
	0.323532					0.348276
	0.220478					0.792151
	0.42355					0.448448
	0.765972					0.401854
	0.21926					0.57719
	0.821573					0.185042
	0.470303					0.437103
	0.85023					0.797066
	0.530811					0.322632
	0.514329					0.340004
	0.267965					0.397134
	0.125644					0.69684
	0.311218					0.803498
	0.148681					0.111905
	0.648115					0.314278
	0.274299					0.338177
	0.663464					0.523595
	0.216524					0.998398
	0.174239					0.301371
	0.288386					1.01699
	0.230569					0.28355
	0.344869					0.382756
	0.16951					0.0763858
	0.0768386					0.925196
	0.196053					0.268739
	0.0429374					0.641118
	0.319847					0.326409
	0.154471					0.604626
	0.0928253					0.466722
	0.561188					0.32904
	0.604087					0.601107
	0.46307					0.269564
	0.479116					0.163588
	0.118091					0.310869
	1.20822					0.205536
	0.237875					0.458539
	0.320566					0.0656859
	0.0800554					0.355027
	0.179069					0.315845
	0.887891					0.369741
	0.234079					0.156239
	0.536251					0.268319
	0.302063					0.0791189
	0.336139					0.455253
	0.531201					0.0406545
	0.543408					0.257434
	0.243902					0.290944
	0.238574					0.802346
	0.922018					0.878443
	0.413389					0.15642
	0.190894					0.323561
	0.460399					0.352879
	0.35184					0.488613
	0.122245					1.24134
	0.587563					0.496368
	0.0970988					0.570981
	0.148108					0.467706
	0.467623					0.160657
	0.90894					0.247777
	0.37523					0.223116
	0.352445					0.0901624
	0.460287					0.442393
	0.19567					0.260332
	0.218419					0.271917
	0.526787					0.208797
	0.256011					0.438264
	0.411225					0.478009
	0.373427					0.600576
	0.443455					0.423168
	0.375853					0.0429556
	0.423725					0.575537
	0.304142					0.180366
	1.0053					0.438656
	0.259625					0.251252
	0.0529223					0.295525
	0.484315					0.366135
	0.0670665					0.37338
	1.06856					0.603202
	0.453179					0.459265
	0.949775					0.631343
	0.39279					0.17539
	0.945669					0.129682
	0.336587					0.172867
	0.391631					0.433393
	0.278742					0.233055
	0.780318					0.321639
	0.336714					0.349317
	0.822439					0.0528538
	0.834068					0.102031
	0.481762					0.649762
	0.634135					0.311363
	0.889274					0.0981392
	0.460472					0.244391
	0.525951					0.162061
	0.315286					0.186082
	0.0180889					1.13014
	0.824059					0.447972
	0.337751					0.274825
	0.636748					0.188427
	0.25877					0.117142
	0.27376					0.243059
	0.421031					0.668728
	0.354368					0.181433
	0.346723					1.29864
	0.631047					0.138045
	0.192392					0.301195
	0.407997					0.690642
	0.192312					0.251319
	0.217335					0.257259
	1.07039					0.555812
	0.31575					0.721132
	0.541155					0.353512
	0.504968					0.173703
	0.796744					0.778825
	0.316113					0.548119
	0.444827					1.04436
	0.294635					0.138607
	0.336179					0.229394
	0.289498					0.439412
	0.247989					0.850218
	0.162952					0.370594
	0.509535					0.278044
	0.105335					0.527105
	0.22202					0.143534
	0.488185					0.289353
	0.399112					0.251844
	0.140025					0.197796
	1.17392					0.501554
	0.52178					0.154959
	0.709902					0.0775004
	0.238339					0.333549
	0.340744					0.3521
	0.365659					0.448621
	0.328807					0.485262
	0.199098					0.486545
	0.24775					0.442373
	0.293586					0.126332
	0.190246					0.345302
	0.764776					0.417203
	0.323292					0.28698
	0.218584					0.185283
	0.155253					0.268143
	0.349413					0.250347
	0.469991					0.454001
	0.301774					0.310977
	0.252525					0.395355
	0.252373					0.3552
	0.520054					0.42649
	0.14364					0.212598
	0.43573					0.423235
	0.588268					1.03709
	0.205757					0.256693
	0.350459					0.0650281
	0.665431					0.501566
	0.0785988					0.675502
	0.470431					0.376857
	0.187136					0.280868
	0.622072					0.624685
	0.332559					0.525725
	0.438736					0.368719
	0.321487					0.0362465
	0.230847					0.595944
	0.174526					0.195375
	0.258115					0.210992
	0.61849					0.225762
	0.336092					0.0575931
	1.25713					0.696174
	0.109981					0.294481
	0.477636					0.191496
	0.182487					0.172111
	0.0718295					0.30549
	0.0360226					0.322517
	1.1491					0.730804
	0.125955					0.568461
	0.466074					0.380285
	0.148339					0.478849
	0.599481					0.511567
	0.184147					0.503956
	0.141974					0.0764856
	0.647863					1.11995
	0.222226					0.122183
	0.179945					0.696951
	0.481836					0.224066
	0.152006					0.162147
	0.0887486					0.195777
	0.321527					0.241446
	0.539133					0.482218
	1.22146					0.37534
	0.313087					0.140441
	0.126764					0.0754501
	0.279297					0.0372479
	0.354454					0.320223
	0.414239					0.914187
	0.353316					0.194313
	0.198644					0.224375
	0.52301					0.161526
	0.547528					0.267061
	0.92551					0.383706
	0.452051					0.294401
	0.97284					0.366394
	0.439442					0.436881
	0.114213					0.424535
	0.345643					0.254577
	1.24108					0.219579
	0.344422					0.225452
	0.178843					0.439837
	0.371989					0.435988
	0.881184					0.112171
	0.292448					0.206065
	0.69743					0.45379
	0.0967089					0.375669
	0.42555					0.189283
	0.165235					0.450019
	0.66957					0.266869
	0.416665					0.773623
	0.144495					0.534023
	0.243861					0.307954
	0.202538					0.102763
	0.321					0.204264
	1.00114					0.15174
	0					0.156847
	0.210051					0.742557
	0.10997					0.61258
	0.726839					0.602217
	0.479384					0.349647
	0.0728868					0.420267
	0.12452					0.477578
	0.25899					0.283002
	0.255834					0.162829
	0.314192					0.738034
	0.331388					0.0899588
	0.472398					0.532556
	0.615029					0.55744
	0.307078					0.204026
	0.412584					0.349565
	0.165386					0.49976
	0.269315					0.183009
	0.113575					0.337861
	0.222474					0.617347
	0.255008					0.387327
	0.287055					0.738643
	0.1681					0.220359
	0.148034					0.0975912
	0.0627072					0.442201
	0.273564					0.817399
	0.033184					0.137843
	0.243037					0.434732
	0.402037					0.494461
	0.0589827					0.251545
	0.0741529					0.311395
	0.293018					0.463406
	0.189355					0.202996
	0.277852					0.487191
	0.0414802					0.130955
	0.0965746					0.792562
	0.0340135					0.311678
	0.0970302					0.113552
	0.324642					0.554132
	0.219186					0.428196
	0.0947989					0.435708
	0.092344					0.185986
	0.194789					0.774938
	0.0659004					0.358556
	0.105104					0.332284
	0.0919732					0.20598
	0.0806268					0.169659
	0.26146					0.169501
	0.199922					0.0287282
	0.11					0.533384
	0.168059					0.314903
	0.103334					1.06155
	0.349653					0.364635
	0.155901					0.532409
	0.118384					0.575057
	0.258707					0.365875
	0.210083					0.188675
	0.189554					0.221006
	0.164541					0.590224
	0.272737					0.422892
	0.237603					0.286524
	0.0592871					0.771195
	0.403414					0.550143
	0.232449					0.365286
	0.379946					0.0402698
	0.270695					0.480761
	0.783825					0.338466
	0.215974					0.437204
	0.882765					0.188316
	0.343288					0.113464
	0.441076					0.31465
	0.334831					0.421343
	0.715589					0.433637
	0.328694					0.324778
	0.191506					0.240798
	0.729965					0.222424
	0.271769					0.361359
	0.0817265					0.807397
	0.26482					0.464281
	0.464387					0.377558
	0.77935					0.0747813
	0.242493					0.128585
	0.0664039					0.464755
	0.165057					0.14084
	0.180128					0.109351
	0.326641					0.0371808
	0.317639					0.10239
	0.282936					0.237939
	0.266028					0.571784
	0.4602					0.496399
	0.117499					0.680219
	0.10922					0.59504
	0.266618					0.0482423
	0.0973842					0.0786041
	0.816579					0.636156
	0.135253					0.599443
	0.513538					0.189129
	0.445217					0.276146
	0.412961					0.409355
	1.24194					0.369779
	0.220815					0.329929
	0.206928					0.232743
	0.207221					0.110635
	0.243391					0.636138
	0.179602					0.754393
	0.0588062					0.690765
	0.524344					0.526755
	0.160473					0.280034
	0.264005					0.242752
	0.681586					0.125598
	0.532935					0.420949
	0.383671					1.07622
	0.429093					0.120878
	0.183196					0.335473
	0.190526					0.646
	0.278213					0.509857
	0.0774856					0.537389
	0.408817					0.737166
	0.770654					0.585637
	0.631239					0.29894
	0.685896					0.221002
	1.06131					0.479004
	0.387429					0.416848
	0.4343					0.343545
	0.67745					0.682717
	0.182794					0.455004
	0.958976					0.208869
	0.919424					0.489453
	0.259817					0.154932
	0.295765					0.266902
	0.350033					0.443662
	0.124848					0.320287
	0.265903					0.325717
	0.444027					0.108812
	0.256625					0.504108
	0.913356					0.506072
	0.701947					0.192825
	0.334689					1.15219
	0.169634					0.550732
	0.204954					0.422823
	0.295671					0.560691
	0.0692591					0.406385
	0.383343					0.399382
	0.210235					0.276059
	0.398522					0.349486
	0.500749					0.430727
	0.252592					0.409166
	0.408592					0.140011
	0.0886121					0.208519
	0.750724					0.379641
	0.547342					0.284118
	0.216299					1.13571
	0.241887					0.322034
	0.484406					0.51513
	0.248135					0.660651
	0.345991					0.173107
	0.655193					0.387523
	0.199881					0.4601
	0.924643					0.188612
	0.191962					0.557421
	0.143451					0.491191
	0.45845					0.10431
	0.735305					0.221071
	0.325866					0.197944
	0.498866					0.33333
	0.192057					0.211306
	0.534707					1.00969
	0.607303					0.311293
	0.546351					0.329596
	0.437798					0.471344
	1.18135					0.374641
	0.409613					0.425909
	0.490307					0.431281
	0.647531					0.628599
	0.694194					0.0727634
[truncated: 32,553 more rows]
