# Supplementary material for: Molecular dissection of PI3Kβ synergistic activation by receptor tyrosine kinases, GβGγ, and Rho-family GTPases
Source: eLife. 2024 May 7;12:RP88991. doi: 10.7554/eLife.88991 (PMC11076043; doi:10.7554/eLife.88991)
Supplement: Figure 5—figure supplement 1—source data 3. [file elife-88991-fig5-figsupp1-data3.xlsx]

## Sheet: Fig 5 - FS1D
Figure 5 -	Cumulative binding frequency plots for Grp1-AF555
figure supplement 1D
	Time (sec)	25pM	50pM	100pM
	0	0	0	0
	0.052	0	0	0
	0.104	0	0	3
	0.156	1	1	5
	0.208	1	2	5
	0.26	1	3	7
	0.312	1	4	10
	0.364	1	4	15
	0.416	1	4	17
	0.468	2	6	19
	0.52	2	6	19
	0.572	3	6	19
	0.624	3	8	20
	0.676	3	11	20
	0.728	4	11	23
	0.78	4	13	23
	0.832	4	13	24
	0.884	6	15	28
	0.936	7	17	29
	0.988	7	17	30
	1.04	7	18	34
	1.092	7	20	36
	1.144	9	23	38
	1.196	9	24	40
	1.248	9	26	41
	1.3	9	26	43
	1.352	9	27	44
	1.404	10	28	47
	1.456	10	29	48
	1.508	12	31	50
	1.56	12	31	52
	1.612	12	35	54
	1.664	12	35	56
	1.716	12	35	58
	1.768	13	35	61
	1.82	13	38	62
	1.872	14	41	63
	1.924	15	42	64
	1.976	15	43	66
	2.028	16	44	68
	2.08	17	45	71
	2.132	18	45	72
	2.184	18	46	75
	2.236	18	46	76
	2.288	18	49	77
	2.34	18	50	78
	2.392	19	51	79
	2.444	19	51	87
	2.496	20	52	90
	2.548	21	54	91
	2.6	21	55	94
	2.652	23	57	94
	2.704	23	59	96
	2.756	25	61	100
	2.808	25	62	104
	2.86	25	62	107
	2.912	25	63	107
	2.964	26	63	108
	3.016	26	64	111
	3.068	26	66	114
	3.12	26	69	116
	3.172	27	70	118
	3.224	29	71	119
	3.276	31	72	120
	3.328	32	73	124
	3.38	32	73	125
	3.432	33	73	128
	3.484	33	74	133
	3.536	34	74	135
	3.588	34	75	137
	3.64	35	75	138
	3.692	35	78	139
	3.744	36	78	141
	3.796	37	79	144
	3.848	40	79	145
	3.9	41	79	149
	3.952	41	81	151
	4.004	41	82	152
	4.056	42	82	152
	4.108	42	83	153
	4.16	42	86	155
	4.212	42	90	156
	4.264	43	90	159
	4.316	43	91	160
	4.368	43	92	160
	4.42	45	93	165
	4.472	46	94	168
	4.524	46	96	171
	4.576	47	97	174
	4.628	48	98	176
	4.68	48	100	177
	4.732	49	102	177
	4.784	50	102	179
	4.836	51	106	181
	4.888	51	107	181
	4.94	53	112	188
	4.992	53	112	190
	5.044	53	113	193
	5.096	54	115	196
	5.148	55	117	197
	5.2	55	117	200
	5.252	55	118	202
	5.304	55	119	204
	5.356	55	119	208
	5.408	55	119	209
	5.46	55	120	211
	5.512	56	121	215
	5.564	56	122	217
	5.616	58	123	219
	5.668	59	123	220
	5.72	60	124	224
	5.772	61	125	225
	5.824	61	126	227
	5.876	62	126	229
	5.928	62	129	230
	5.98	62	131	230
	6.032	62	132	234
	6.084	62	134	236
	6.136	62	134	240
	6.188	62	134	241
	6.24	62	136	243
	6.292	62	137	243
	6.344	62	137	245
	6.396	62	137	248
	6.448	63	138	251
	6.5	63	144	253
	6.552	64	146	255
	6.604	65	146	257
	6.656	65	149	259
	6.708	66	149	260
	6.76	66	151	262
	6.812	67	151	265
	6.864	67	153	265
	6.916	67	155	268
	6.968	68	157	270
	7.02	68	158	273
	7.072	68	159	277
	7.124	68	159	280
	7.176	69	161	280
	7.228	69	161	282
	7.28	69	167	284
	7.332	69	168	286
	7.384	69	169	288
	7.436	69	170	291
	7.488	69	172	294
	7.54	69	172	297
	7.592	69	174	298
	7.644	70	175	298
	7.696	70	176	303
	7.748	70	179	305
	7.8	72	181	305
	7.852	72	183	305
	7.904	72	184	305
	7.956	73	185	310
	8.008	74	185	311
	8.06	74	185	312
	8.112	74	185	314
	8.164	75	186	314
	8.216	75	186	316
	8.268	76	187	317
	8.32	79	188	319
	8.372	79	191	322
	8.424	80	192	323
	8.476	81	194	326
	8.528	83	194	327
	8.58	85	195	330
	8.632	86	195	331
	8.684	86	195	333
	8.736	88	195	333
	8.788	89	196	337
	8.84	89	198	339
	8.892	89	199	341
	8.944	90	199	343
	8.996	90	199	346
	9.048	90	201	347
	9.1	92	204	348
	9.152	92	204	348
	9.204	92	207	349
	9.256	93	208	349
	9.308	94	208	349
	9.36	96	209	352
	9.412	96	209	354
	9.464	97	209	357
	9.516	97	210	357
	9.568	97	211	357
	9.62	98	211	360
	9.672	100	213	363
	9.724	100	214	367
	9.776	100	214	370
	9.828	101	217	374
	9.88	101	218	376
	9.932	102	220	376
	9.984	102	222	378
	10.036	102	225	379
	10.088	102	226	381
	10.14	103	227	383
	10.192	103	229	386
	10.244	103	231	389
	10.296	104	231	391
	10.348	104	231	392
	10.4	104	233	392
	10.452	106	234	392
	10.504	108	236	394
	10.556	108	236	395
	10.608	108	236	398
	10.66	109	240	399
	10.712	110	242	399
	10.764	110	243	399
	10.816	111	243	401
	10.868	111	244	406
	10.92	111	246	408
	10.972	113	247	408
	11.024	114	247	411
	11.076	114	248	411
	11.128	115	250	411
	11.18	115	252	413
	11.232	115	254	414
	11.284	115	258	416
	11.336	115	259	416
	11.388	115	259	418
	11.44	117	260	420
	11.492	120	261	421
	11.544	120	265	423
	11.596	120	267	426
	11.648	121	267	428
	11.7	121	267	428
	11.752	126	268	431
	11.804	127	268	433
	11.856	127	268	439
	11.908	127	268	440
	11.96	127	269	446
	12.012	127	271	450
	12.064	131	273	453
	12.116	131	273	453
	12.168	131	273	456
	12.22	131	273	457
	12.272	132	275	459
	12.324	133	275	460
	12.376	136	276	462
	12.428	136	276	462
	12.48	136	276	464
	12.532	137	277	471
	12.584	138	278	473
	12.636	140	278	475
	12.688	141	278	476
	12.74	142	278	478
	12.792	142	278	483
	12.844	143	279	484
	12.896	143	279	487
	12.948	144	281	491
	13	144	282	493
	13.052	145	285	498
	13.104	146	285	500
	13.156	146	285	502
	13.208	146	285	503
	13.26	146	285	504
	13.312	146	285	507
	13.364	147	286	509
	13.416	148	286	512
	13.468	148	287	513
	13.52	148	289	513
	13.572	148	289	513
	13.624	149	290	516
	13.676	150	292	517
	13.728	150	292	517
	13.78	152	293	519
	13.832	153	293	521
	13.884	154	293	525
	13.936	154	293	525
	13.988	156	295	527
	14.04	159	295	528
	14.092	160	297	528
	14.144	161	297	530
	14.196	163	299	530
	14.248	166	300	532
	14.3	167	301	532
	14.352	167	301	532
	14.404	168	301	534
	14.456	168	301	539
	14.508	168	301	544
	14.56	168	301	547
	14.612	173	303	548
	14.664	174	303	549
	14.716	177	305	550
	14.768	178	305	552
	14.82	181	306	554
	14.872	181	306	554
	14.924	183	307	556
	14.976	184	308	558
	15.028	186	309	561
	15.08	191	312	561
	15.132	193	312	565
	15.184	194	312	568
	15.236	194	312	571
	15.288	200	312	575
	15.34	201	313	576
	15.392	203	315	578
	15.444	203	316	579
	15.496	203	316	582
	15.548	205	319	584
	15.6	205	319	585
	15.652	206	319	587
	15.704	207	321	588
	15.756	209	321	590
	15.808	209	321	592
	15.86	209	321	597
	15.912	210	322	600
	15.964	211	322	600
	16.016	215	326	600
	16.068	216	326	604
	16.12	218	326	606
	16.172	219	328	607
	16.224	220	329	609
	16.276	220	330	611
	16.328	221	333	612
	16.38	225	333	616
	16.432	230	336	617
	16.484	232	338	619
	16.536	234	339	622
	16.588	237	340	624
	16.64	238	340	627
	16.692	239	342	629
	16.744	243	344	631
	16.796	245	347	632
	16.848	245	349	632
	16.9	248	351	635
	16.952	249	353	636
	17.004	251	354	637
	17.056	251	355	638
	17.108	255	358	639
	17.16	256	360	639
	17.212	259	361	642
	17.264	260	363	644
	17.316	262	365	645
	17.368	264	367	646
	17.42	264	368	647
	17.472	265	369	651
	17.524	265	372	656
	17.576	265	373	656
	17.628	267	375	663
	17.68	267	376	663
	17.732	267	377	664
	17.784	267	378	666
	17.836	267	381	668
	17.888	267	382	668
	17.94	267	383	670
	17.992	267	384	674
	18.044	267	384	678
	18.096	268	385	679
	18.148	269	385	679
	18.2	269	385	680
	18.252	270	387	683
	18.304	270	388	686
	18.356	270	388	688
	18.408	272	390	690
	18.46	274	390	691
	18.512	274	391	691
	18.564	274	392	694
	18.616	274	394	694
	18.668	274	395	696
	18.72	274	395	698
	18.772	275	396	702
	18.824	277	397	702
	18.876	278	399	706
	18.928	278	405	708
	18.98	278	405	710
	19.032	279	406	711
	19.084	280	408	714
	19.136	280	408	715
	19.188	280	409	717
	19.24	280	410	717
	19.292	280	412	720
	19.344	280	412	722
	19.396	280	414	724
	19.448	280	414	725
	19.5	280	415	725
	19.552	280	417	727
	19.604	280	419	727
	19.656	280	420	729
	19.708	280	420	731
	19.76	280	420	732
	19.812	280	421	734
	19.864	280	421	737
	19.916	280	421	738
	19.968	280	422	741
	20.02	280	423	744
	20.072	280	423	745
	20.124	280	423	746
	20.176	280	426	749
	20.228	280	427	751
	20.28	280	427	752
	20.332	280	428	753
	20.384	280	428	756
	20.436	280	428	759
	20.488	280	428	761
	20.54	281	429	762
	20.592	281	430	768
	20.644	281	430	770
	20.696	282	432	770
	20.748	284	432	773
	20.8	284	432	773
	20.852	284	433	773
	20.904	284	436	776
	20.956	285	436	777
	21.008	285	437	777
	21.06	285	439	779
	21.112	285	440	779
	21.164	286	441	782
	21.216	286	443	782
	21.268	287	444	783
	21.32	287	445	787
	21.372	289	447	792
	21.424	291	448	793
	21.476	292	449	793
	21.528	293	450	794
	21.58	293	451	794
	21.632	294	452	797
	21.684	296	453	801
	21.736	297	457	802
	21.788	297	458	804
	21.84	297	459	807
	21.892	299	459	809
	21.944	299	459	812
	21.996	300	461	812
	22.048	300	462	815
	22.1	301	462	818
	22.152	301	463	821
	22.204	302	463	823
	22.256	304	465	823
	22.308	306	465	825
	22.36	306	465	826
	22.412	307	465	827
	22.464	307	467	830
	22.516	307	469	833
	22.568	308	470	835
	22.62	308	471	836
	22.672	309	472	840
	22.724	310	472	842
	22.776	310	473	842
	22.828	310	474	842
	22.88	310	475	843
	22.932	310	475	845
	22.984	311	476	845
	23.036	311	479	847
	23.088	312	479	847
	23.14	313	482	849
	23.192	313	482	851
	23.244	314	484	852
	23.296	315	485	855
	23.348	316	485	856
	23.4	317	485	857
	23.452	317	485	860
	23.504	317	485	861
	23.556	318	486	863
	23.608	319	487	864
	23.66	320	488	865
	23.712	320	489	866
	23.764	320	490	869
	23.816	321	490	871
	23.868	321	491	872
	23.92	321	491	877
	23.972	321	492	878
	24.024	321	495	882
	24.076	325	499	883
	24.128	326	499	884
	24.18	326	499	885
	24.232	326	500	886
	24.284	327	500	888
	24.336	327	503	889
	24.388	328	503	890
	24.44	329	504	890
	24.492	329	506	890
	24.544	331	507	895
	24.596	331	509	896
	24.648	331	510	897
	24.7	332	511	898
	24.752	332	511	899
	24.804	333	513	900
	24.856	333	514	903
	24.908	333	514	906
	24.96	333	515	907
	25.012	334	515	910
	25.064	335	517	913
	25.116	336	518	915
	25.168	336	518	918
	25.22	336	523	920
	25.272	337	525	921
	25.324	337	525	923
	25.376	337	526	928
	25.428	340	527	932
	25.48	340	528	934
	25.532	341	528	935
	25.584	341	530	936
	25.636	341	531	938
	25.688	342	534	940
	25.74	343	534	941
	25.792	343	537	944
	25.844	344	538	945
	25.896	345	540	945
	25.948	345	541	946
	26	345	542	950
	26.052	345	544	951
	26.104	346	544	956
	26.156	347	545	958
	26.208	347	547	963
	26.26	347	549	964
	26.312	347	549	969
	26.364	347	550	969
	26.416	347	550	970
	26.468	347	553	971
	26.52	347	553	974
	26.572	347	555	974
	26.624	347	557	978
	26.676	347	558	980
	26.728	347	558	982
	26.78	347	560	985
	26.832	347	563	986
	26.884	348	564	989
	26.936	348	564	991
	26.988	348	565	995
	27.04	348	566	995
	27.092	348	569	999
	27.144	348	569	1001
	27.196	349	570	1004
	27.248	349	571	1007
	27.3	349	571	1011
	27.352	349	571	1013
	27.404	350	573	1017
	27.456	350	573	1018
	27.508	350	573	1021
	27.56	350	574	1024
	27.612	350	574	1025
	27.664	350	577	1028
	27.716	351	578	1030
	27.768	351	580	1032
	27.82	352	581	1033
	27.872	353	582	1036
	27.924	353	583	1036
	27.976	353	583	1039
	28.028	354	583	1043
	28.08	354	585	1043
	28.132	354	585	1048
	28.184	354	586	1050
	28.236	354	586	1053
	28.288	354	586	1056
	28.34	355	586	1058
	28.392	355	587	1060
	28.444	356	587	1062
	28.496	356	588	1066
	28.548	357	589	1069
	28.6	357	589	1071
	28.652	357	589	1074
	28.704	357	590	1075
	28.756	357	591	1075
	28.808	357	591	1078
	28.86	357	591	1081
	28.912	357	591	1083
	28.964	357	592	1086
	29.016	357	593	1091
	29.068	358	594	1095
	29.12	358	594	1099
	29.172	358	596	1100
	29.224	359	597	1104
	29.276	359	599	1108
	29.328	359	600	1111
	29.38	359	600	1111
	29.432	359	600	1114
	29.484	360	601	1115
	29.536	361	601	1120
	29.588	361	601	1120
	29.64	361	602	1122
	29.692	361	604	1122
	29.744	361	607	1124
	29.796	362	607	1128
	29.848	363	607	1130
	29.9	363	608	1130
	29.952	363	609	1134
	30.004	363	611	1135
	30.056	366	613	1138
