# Supplementary material for: Molecular dissection of PI3Kβ synergistic activation by receptor tyrosine kinases, GβGγ, and Rho-family GTPases
Source: eLife. 2024 May 7;12:RP88991. doi: 10.7554/eLife.88991 (PMC11076043; doi:10.7554/eLife.88991)
Supplement: Figure 5—figure supplement 1—source data 4. [file elife-88991-fig5-figsupp1-data4.xlsx]

## Sheet: Fig 5 - FS1E
Figure 5 -	Cumulative binding frequency plots for Btk-SNAP-AF488
figure supplement 1E
	Time (sec)	25pM	50pM	100pM
	0	0	0	0
	0.052	0	0	0
	0.104	1	3	7
	0.156	5	5	14
	0.208	8	10	24
	0.26	11	11	32
	0.312	13	18	41
	0.364	16	20	45
	0.416	18	21	53
	0.468	18	26	65
	0.52	21	29	74
	0.572	24	33	92
	0.624	24	42	101
	0.676	25	46	110
	0.728	28	48	124
	0.78	30	55	131
	0.832	36	59	138
	0.884	38	60	150
	0.936	39	61	156
	0.988	41	63	161
	1.04	42	68	170
	1.092	43	73	182
	1.144	44	79	195
	1.196	48	80	205
	1.248	48	84	216
	1.3	49	89	224
	1.352	49	93	226
	1.404	51	98	235
	1.456	52	104	250
	1.508	55	107	254
	1.56	58	111	263
	1.612	58	117	269
	1.664	59	121	275
	1.716	61	129	287
	1.768	64	135	294
	1.82	64	136	306
	1.872	66	141	316
	1.924	67	143	321
	1.976	67	148	335
	2.028	68	152	341
	2.08	71	154	348
	2.132	75	160	359
	2.184	79	163	367
	2.236	81	165	373
	2.288	82	170	379
	2.34	83	177	389
	2.392	83	183	398
	2.444	87	188	404
	2.496	89	193	411
	2.548	90	198	415
	2.6	92	198	421
	2.652	94	202	429
	2.704	95	212	437
	2.756	96	219	445
	2.808	97	223	454
	2.86	97	225	458
	2.912	97	232	464
	2.964	99	240	467
	3.016	100	241	475
	3.068	102	249	484
	3.12	103	253	492
	3.172	105	258	496
	3.224	106	263	503
	3.276	107	268	509
	3.328	107	272	518
	3.38	109	276	525
	3.432	110	278	533
	3.484	113	281	540
	3.536	115	285	546
	3.588	115	288	553
	3.64	116	291	562
	3.692	118	293	568
	3.744	119	295	578
	3.796	120	299	584
	3.848	121	306	590
	3.9	123	308	597
	3.952	124	310	604
	4.004	125	315	610
	4.056	125	317	620
	4.108	126	320	629
	4.16	127	325	636
	4.212	132	327	645
	4.264	133	333	652
	4.316	133	336	659
	4.368	134	340	665
	4.42	135	345	672
	4.472	135	350	682
	4.524	135	357	690
	4.576	136	360	698
	4.628	138	367	706
	4.68	140	374	715
	4.732	141	378	723
	4.784	142	379	726
	4.836	144	387	730
	4.888	144	387	738
	4.94	145	393	742
	4.992	147	395	749
	5.044	150	398	753
	5.096	152	401	760
	5.148	153	402	767
	5.2	154	407	774
	5.252	155	412	785
	5.304	160	416	796
	5.356	160	419	803
	5.408	160	422	805
	5.46	161	422	814
	5.512	162	426	826
	5.564	166	432	829
	5.616	168	440	835
	5.668	172	443	845
	5.72	173	444	852
	5.772	173	448	861
	5.824	175	455	864
	5.876	177	459	872
	5.928	180	463	879
	5.98	181	468	886
	6.032	181	475	890
	6.084	181	480	896
	6.136	183	485	904
	6.188	184	487	912
	6.24	186	490	919
	6.292	187	491	926
	6.344	188	496	931
	6.396	190	500	936
	6.448	192	504	942
	6.5	193	509	947
	6.552	194	516	955
	6.604	196	516	961
	6.656	199	517	969
	6.708	201	521	977
	6.76	205	525	983
	6.812	205	527	988
	6.864	205	531	998
	6.916	208	534	1001
	6.968	210	535	1008
	7.02	212	541	1016
	7.072	213	546	1024
	7.124	213	548	1027
	7.176	216	550	1032
	7.228	218	552	1037
	7.28	219	556	1047
	7.332	219	562	1055
	7.384	219	565	1067
	7.436	220	568	1077
	7.488	220	570	1087
	7.54	221	576	1095
	7.592	221	576	1100
	7.644	223	583	1108
	7.696	225	587	1118
	7.748	225	592	1125
	7.8	229	598	1127
	7.852	231	602	1136
	7.904	231	602	1145
	7.956	232	607	1152
	8.008	233	611	1157
	8.06	234	616	1164
	8.112	234	618	1172
	8.164	236	622	1177
	8.216	238	627	1181
	8.268	240	633	1187
	8.32	242	639	1198
	8.372	242	645	1211
	8.424	244	651	1217
	8.476	245	653	1223
	8.528	245	658	1229
	8.58	247	661	1235
	8.632	248	665	1241
	8.684	248	667	1250
	8.736	251	668	1259
	8.788	252	668	1268
	8.84	253	671	1274
	8.892	254	675	1283
	8.944	257	679	1292
	8.996	260	683	1301
	9.048	261	684	1306
	9.1	262	686	1312
	9.152	263	694	1324
	9.204	263	701	1330
	9.256	264	702	1339
	9.308	266	709	1353
	9.36	269	713	1360
	9.412	270	717	1368
	9.464	270	722	1375
	9.516	272	730	1381
	9.568	272	736	1391
	9.62	275	738	1397
	9.672	276	739	1404
	9.724	278	743	1409
	9.776	280	747	1417
	9.828	281	751	1424
	9.88	284	755	1437
	9.932	286	757	1442
	9.984	286	759	1446
	10.036	288	762	1453
	10.088	289	768	1465
	10.14	291	771	1472
	10.192	292	774	1482
	10.244	295	778	1490
	10.296	298	782	1495
	10.348	300	786	1503
	10.4	300	790	1509
	10.452	301	793	1516
	10.504	303	795	1522
	10.556	304	795	1530
	10.608	306	802	1538
	10.66	308	805	1543
	10.712	314	809	1553
	10.764	318	809	1562
	10.816	318	813	1574
	10.868	320	816	1584
	10.92	322	821	1590
	10.972	323	825	1596
	11.024	327	831	1605
	11.076	329	837	1620
	11.128	330	837	1627
	11.18	330	841	1640
	11.232	334	849	1647
	11.284	334	850	1651
	11.336	334	855	1661
	11.388	335	860	1669
	11.44	339	863	1682
	11.492	339	866	1691
	11.544	339	869	1698
	11.596	341	872	1707
	11.648	345	877	1722
	11.7	345	879	1730
	11.752	346	881	1740
	11.804	348	890	1750
	11.856	349	897	1759
	11.908	352	904	1764
	11.96	355	906	1774
	12.012	358	908	1784
	12.064	360	912	1788
	12.116	362	915	1798
	12.168	363	918	1803
	12.22	368	919	1810
	12.272	368	924	1818
	12.324	370	926	1828
	12.376	372	931	1836
	12.428	373	934	1847
	12.48	375	936	1855
	12.532	376	938	1865
	12.584	381	943	1872
	12.636	381	947	1879
	12.688	382	948	1890
	12.74	383	949	1898
	12.792	384	952	1902
	12.844	387	959	1906
	12.896	391	960	1916
	12.948	395	965	1924
	13	397	970	1936
	13.052	402	974	1941
	13.104	403	977	1947
	13.156	403	981	1953
	13.208	404	986	1959
	13.26	408	988	1965
	13.312	409	991	1974
	13.364	411	994	1979
	13.416	413	999	1986
	13.468	415	1005	1992
	13.52	417	1006	2001
	13.572	419	1010	2007
	13.624	419	1014	2013
	13.676	421	1019	2020
	13.728	427	1022	2026
	13.78	428	1031	2034
	13.832	429	1034	2043
	13.884	429	1040	2048
	13.936	433	1043	2052
	13.988	434	1048	2061
	14.04	436	1053	2071
	14.092	436	1060	2074
	14.144	437	1064	2076
	14.196	437	1065	2080
	14.248	438	1071	2088
	14.3	439	1074	2091
	14.352	440	1080	2099
	14.404	441	1084	2109
	14.456	442	1090	2115
	14.508	442	1093	2122
	14.56	442	1097	2131
	14.612	442	1102	2138
	14.664	446	1104	2148
	14.716	447	1106	2153
	14.768	448	1110	2155
	14.82	451	1114	2161
	14.872	452	1119	2165
	14.924	454	1125	2177
	14.976	455	1128	2184
	15.028	457	1133	2191
	15.08	458	1138	2198
	15.132	460	1145	2206
	15.184	463	1149	2212
	15.236	466	1154	2224
	15.288	467	1158	2233
	15.34	467	1160	2241
	15.392	472	1164	2248
	15.444	472	1172	2255
	15.496	476	1175	2264
	15.548	477	1180	2272
	15.6	479	1183	2278
	15.652	480	1187	2282
	15.704	481	1189	2291
	15.756	485	1195	2302
	15.808	489	1197	2314
	15.86	492	1197	2319
	15.912	494	1203	2328
	15.964	496	1207	2333
	16.016	500	1210	2337
	16.068	502	1216	2343
	16.12	505	1219	2354
	16.172	507	1224	2361
	16.224	509	1228	2370
	16.276	512	1234	2376
	16.328	514	1240	2386
	16.38	516	1242	2393
	16.432	517	1246	2399
	16.484	519	1250	2408
	16.536	519	1252	2418
	16.588	520	1258	2425
	16.64	522	1259	2433
	16.692	522	1261	2439
	16.744	522	1261	2443
	16.796	523	1265	2452
	16.848	524	1271	2462
	16.9	529	1274	2470
	16.952	529	1282	2475
	17.004	530	1288	2480
	17.056	531	1292	2492
	17.108	533	1295	2498
	17.16	534	1305	2506
	17.212	535	1311	2513
	17.264	537	1317	2519
	17.316	541	1320	2527
	17.368	542	1321	2537
	17.42	542	1324	2548
	17.472	544	1332	2554
	17.524	546	1337	2559
	17.576	549	1341	2565
	17.628	552	1343	2571
	17.68	553	1343	2577
	17.732	555	1344	2583
	17.784	556	1350	2591
	17.836	559	1360	2597
	17.888	559	1366	2607
	17.94	561	1372	2616
	17.992	561	1376	2622
	18.044	564	1383	2632
	18.096	564	1387	2639
	18.148	565	1391	2648
	18.2	568	1396	2657
	18.252	570	1402	2667
	18.304	570	1405	2680
	18.356	573	1412	2687
	18.408	574	1416	2692
	18.46	575	1421	2700
	18.512	579	1427	2708
	18.564	581	1430	2716
	18.616	582	1432	2721
	18.668	583	1435	2733
	18.72	585	1441	2740
	18.772	588	1444	2747
	18.824	590	1446	2751
	18.876	590	1447	2760
	18.928	592	1451	2768
	18.98	593	1456	2779
	19.032	594	1463	2784
	19.084	594	1464	2792
	19.136	596	1464	2794
	19.188	597	1468	2806
	19.24	600	1472	2813
	19.292	603	1477	2818
	19.344	604	1482	2820
	19.396	608	1485	2825
	19.448	609	1489	2829
	19.5	611	1493	2836
	19.552	614	1495	2840
	19.604	615	1500	2847
	19.656	615	1502	2852
	19.708	616	1505	2856
	19.76	616	1508	2867
	19.812	621	1512	2870
	19.864	622	1514	2878
	19.916	623	1520	2884
	19.968	624	1524	2892
	20.02	624	1526	2896
	20.072	624	1529	2900
	20.124	625	1533	2907
	20.176	626	1538	2912
	20.228	626	1543	2922
	20.28	627	1546	2930
	20.332	627	1551	2934
	20.384	629	1554	2945
	20.436	630	1556	2955
	20.488	632	1557	2962
	20.54	635	1562	2969
	20.592	637	1565	2974
	20.644	637	1567	2985
	20.696	639	1574	2989
	20.748	641	1574	2997
	20.8	643	1575	3009
	20.852	644	1576	3016
	20.904	647	1581	3023
	20.956	649	1585	3027
	21.008	649	1587	3036
	21.06	649	1590	3041
	21.112	652	1594	3048
	21.164	653	1596	3051
	21.216	654	1598	3053
	21.268	656	1601	3060
	21.32	657	1604	3066
	21.372	659	1607	3073
	21.424	661	1611	3080
	21.476	665	1614	3088
	21.528	668	1618	3091
	21.58	671	1623	3099
	21.632	671	1627	3108
	21.684	671	1631	3117
	21.736	674	1634	3124
	21.788	678	1639	3133
	21.84	679	1642	3137
	21.892	679	1644	3146
	21.944	679	1647	3151
	21.996	679	1651	3155
	22.048	680	1655	3163
	22.1	683	1656	3173
	22.152	685	1658	3183
	22.204	689	1666	3189
	22.256	689	1670	3196
	22.308	692	1673	3208
	22.36	692	1676	3215
	22.412	695	1679	3222
	22.464	699	1685	3231
	22.516	700	1692	3241
	22.568	701	1692	3247
	22.62	703	1697	3255
	22.672	704	1701	3264
	22.724	705	1703	3270
	22.776	708	1708	3274
	22.828	709	1711	3281
	22.88	709	1712	3288
	22.932	711	1712	3295
	22.984	712	1715	3304
	23.036	714	1721	3314
	23.088	716	1725	3318
	23.14	717	1730	3324
	23.192	719	1733	3328
	23.244	720	1743	3339
	23.296	720	1746	3348
	23.348	723	1748	3360
	23.4	724	1751	3367
	23.452	726	1753	3374
	23.504	728	1757	3383
	23.556	728	1759	3391
	23.608	731	1762	3401
	23.66	733	1765	3408
	23.712	737	1771	3414
	23.764	738	1772	3418
	23.816	740	1772	3428
	23.868	740	1776	3431
	23.92	743	1779	3435
	23.972	744	1782	3444
	24.024	745	1785	3447
	24.076	747	1788	3453
	24.128	748	1792	3461
	24.18	750	1794	3472
	24.232	753	1796	3474
	24.284	758	1799	3478
	24.336	760	1802	3484
	24.388	762	1808	3495
	24.44	762	1810	3500
	24.492	765	1812	3506
	24.544	767	1816	3513
	24.596	768	1822	3517
	24.648	770	1828	3523
	24.7	770	1830	3532
	24.752	771	1833	3542
	24.804	772	1834	3551
	24.856	775	1839	3561
	24.908	778	1840	3564
	24.96	779	1842	3575
	25.012	782	1847	3584
	25.064	784	1850	3597
	25.116	786	1852	3604
	25.168	787	1858	3609
	25.22	789	1863	3610
	25.272	790	1869	3614
	25.324	793	1875	3623
	25.376	795	1878	3631
	25.428	799	1882	3640
	25.48	803	1886	3644
	25.532	805	1888	3647
	25.584	810	1890	3656
	25.636	813	1894	3662
	25.688	813	1900	3675
	25.74	813	1904	3683
	25.792	816	1907	3694
	25.844	819	1912	3700
	25.896	820	1918	3708
	25.948	823	1919	3716
	26	825	1923	3721
	26.052	825	1934	3725
	26.104	828	1937	3733
	26.156	830	1942	3743
	26.208	831	1945	3754
	26.26	831	1948	3763
	26.312	834	1952	3769
	26.364	834	1956	3776
	26.416	834	1958	3778
	26.468	839	1965	3782
	26.52	840	1969	3787
	26.572	841	1969	3794
	26.624	842	1972	3796
	26.676	842	1976	3804
	26.728	842	1979	3806
	26.78	843	1982	3815
	26.832	843	1988	3826
	26.884	844	1989	3834
	26.936	844	1991	3845
	26.988	848	1994	3849
	27.04	851	1997	3859
	27.092	851	2003	3864
	27.144	851	2006	3873
	27.196	852	2010	3877
	27.248	853	2016	3887
	27.3	855	2021	3898
	27.352	856	2021	3899
	27.404	858	2026	3912
	27.456	860	2032	3922
	27.508	861	2033	3924
	27.56	862	2036	3929
	27.612	864	2038	3941
	27.664	865	2039	3948
	27.716	866	2042	3954
	27.768	867	2046	3966
	27.82	867	2048	3976
	27.872	870	2049	3983
	27.924	875	2050	3993
	27.976	877	2053	3998
	28.028	877	2054	4004
	28.08	879	2055	4009
	28.132	880	2058	4017
	28.184	881	2062	4025
	28.236	882	2064	4031
	28.288	885	2065	4038
	28.34	886	2068	4046
	28.392	888	2075	4052
	28.444	889	2078	4060
	28.496	889	2082	4066
	28.548	890	2085	4072
	28.6	891	2091	4084
	28.652	894	2096	4095
	28.704	895	2100	4108
	28.756	897	2104	4115
	28.808	899	2106	4124
	28.86	899	2111	4129
	28.912	900	2115	4136
	28.964	901	2121	4140
	29.016	904	2126	4158
	29.068	906	2131	4161
	29.12	906	2135	4167
	29.172	906	2139	4176
	29.224	906	2143	4183
	29.276	908	2146	4193
	29.328	908	2152	4205
	29.38	910	2155	4211
	29.432	912	2159	4216
	29.484	914	2164	4225
	29.536	915	2170	4232
	29.588	916	2174	4236
	29.64	916	2179	4242
	29.692	917	2182	4250
	29.744	919	2183	4257
	29.796	919	2189	4261
	29.848	920	2194	4276
	29.9	921	2197	4283
	29.952	923	2201	4291
	30.004	927	2206	4300
	30.056	928	2214	4305
	30.108	928	2218	4313
	30.16	931	2220	4322
	30.212	933	2226	4330
