# Supplementary material for: Molecular dissection of PI3Kβ synergistic activation by receptor tyrosine kinases, GβGγ, and Rho-family GTPases
Source: eLife. 2024 May 7;12:RP88991. doi: 10.7554/eLife.88991 (PMC11076043; doi:10.7554/eLife.88991)
Supplement: Figure 5—figure supplement 1—source data 5. [file elife-88991-fig5-figsupp1-data5.xlsx]

## Sheet: Fig 5 - FS1F
Figure 5 -
figure supplement 1F	[Grp1-AF555]	slope (events/µm2•sec)
	25pM	0.00432189
	50pM	0.00696768
	100pM	0.0123825
	[Btk-SNAP-AF488]	slope (events/µm2•sec)
	25pM	0.0103366
	50pM	0.0248817
	100pM	0.0480506
