# Supplementary material for: Molecular dissection of PI3Kβ synergistic activation by receptor tyrosine kinases, GβGγ, and Rho-family GTPases
Source: eLife. 2024 May 7;12:RP88991. doi: 10.7554/eLife.88991 (PMC11076043; doi:10.7554/eLife.88991)
Supplement: Figure 5—figure supplement 2—source data 2. [file elife-88991-fig5-figsupp2-data2.xlsx]

## Sheet: Fig 5 - FS2D
Figure 5 -	Dy647-PIK3CB activity measured in the presence of varying concentrations of GbGg
figure supplement 2D	GbGg concentrations represent the solution concentration used to equilibrate the membrane
	time [sec]	pY alone	pY, 25 µM GbGg	pY, 50 µM GbGg	pY, 100 µM GbGg	pY, 200 µM GbGg	3KB MUT, pY, 200 µM GbGg
	-300	-533.449	-640.708	-754.078	-980.91	-382.442	-165.95
	-290	-511.679	-485.433	-726.281	-972.484	-337.447	-125.7
	-280	-472.06	-520.582	-655.926	-875.652	-319.249	-143.615
	-270	-457.282	-413.069	-662.719	-870.397	-312.088	-110.16
	-260	-444.075	-368.016	-601.902	-808.474	-325.594	-129.636
	-250	-418.288	-397.731	-527.848	-818.369	-275.92	-115.992
	-240	-403.586	-363.255	-553.112	-745.76	-305.535	-80.7395
	-230	-349.726	-311.727	-575.26	-723.483	-272.642	-76.2287
	-220	-356.598	-345.224	-559.915	-635.368	-275.816	-62.361
	-210	-376.556	-289.673	-488.341	-638.371	-278.654	-67.6223
	-200	-356.457	-310.501	-471.449	-651.212	-271.097	-56.7923
	-190	-313.238	-316.663	-460.026	-610.226	-273.046	-39.1682
	-180	-284.295	-252.97	-461.636	-566.568	-261.733	-33.0726
	-170	-243.593	-246.671	-433.586	-552.653	-256.505	-27.5359
	-160	-264.301	-227.15	-453.455	-584.615	-246.237	-15.8277
	-150	-268.066	-230.892	-431.297	-508.947	-274.627	-41.9905
	-140	-248.32	-231.774	-376.466	-568.368	-244.7	-37.6992
	-130	-229.858	-219.689	-312.183	-469.445	-229.609	-18.8416
	-120	-226.358	-267.082	-318.627	-318.802	-235.958	-18.5422
	-110	-187.572	-226.541	-287.534	-325.59	-247.582	-10.2311
	-100	-154.123	-228.913	-311.442	-343.258	-212.363	-13.3688
	-90	-111.036	-169.066	-237.303	-300.068	-222.123	-11.8479
	-80	-104.946	-201.842	-252.616	-267.622	-215.394	38.813
	-70	-82.5383	-181.087	-263.871	-272.23	-213.256	29.5718
	-60	-87.3614	-162.078	-218.567	-294.007	-211.195	16.7739
	-50	-58.5911	-145.417	-254.217	-225.949	-224.545	24.6538
	-40	-41.2552	-177.048	-251.016	-265.911	-213.656	21.2527
	-30	-38.6371	-213.093	-208.108	-315.573	-205.146	7.22929
	-20	-76.324	-68.6694	-125.132	-206.643	-256.277	25.8154
	-10	-60.6599	-6.44253	-152.578	-261.713	-203.589	43.1641
	0	-0.000129845	0.000532293	0.000745499	0.00773495	-0.000405135	1.80573e-05
	10	-3.96526	33.5221	247.955	192.299	306.351	60.385
	20	-14.0445	89.1777	221.049	333.209	558.268	75.2627
	30	8.26691	208.246	420.065	692.036	884.142	68.3728
	40	1.19863	227.423	529.153	934.669	1131.87	72.201
	50	40.1764	306.735	642.374	1338.5	1391.41	96.5434
	60	47.1886	487.237	711.161	1523.41	1667.35	69.3069
	70	72.2904	469.615	932.389	1925.31	2025.67	106.507
	80	82.2814	598.068	1133.54	2056.75	2375.85	123.045
	90	92.6693	579.452	1220.35	2515.46	2641.64	108.479
	100	56.3617	596.713	1281.7	2648.43	2968.68	109.293
	110	51.3141	751.756	1502.83	3050.58	3198.42	158.318
	120	105.026	811.538	1606.49	3261.93	3626.02	139.636
	130	82.6703	873.573	1853.33	3401.41	4015.15	141.947
	140	105.772	867.178	1904.99	3664.12	4309.77	172.285
	150	106.048	1011.55	1780.28	4176.62	4695.68	162.461
	160	151.417	1058.07	2153.51	4215.88	4933.73	170.92
	170	130.994	1310.3	2292.27	4552.77	5230.75	210.551
	180	137.384	1257.82	2524.13	4965.86	5805.03	180.692
	190	110.659	1370.51	2670.4	4804.27	6080.47	154.222
	200	159.984	1416.62	2572.29	5441.75	6497.19	189.263
	210	169.659	1489.6	2784.47	5748.27	6750.95	202.695
	220	175.62	1469.84	2869.13	5936.15	7215.27	207.35
	230	170.581	1645.19	3012.11	6211.23	7212.58	231.145
	240	197.996	1630.82	3028.52	6595.95	7633.72	226.603
	250	174.157	1630	3393.33	6748.99	7909.67	225.581
	260	172.413	1797.7	3407.01	7049.11	8267.53	246.69
	270	160.237	1774.85	3548.47	7810.69	8807.12	234.259
	280	167.185	1970.77	3683.52	7738.3	9044.76	225.956
	290	196.003	1859.19	3731.04	7839.77	9463.71	228.347
	300	223.831	1977.04	3960.92	8118.7	9428.06	243.109
	310	247.622	2027.03	4057.2	8674.15	10103.2	266.417
	320	253.159	2105.82	4196.53	8953.95	10351.4	214.643
	330	222.488	1992.59	4237.64	8792.61	10717.3	260.114
	340	244.178	2116.94	4113.36	9240.24	10973.7	273.419
	350	269.994	2185.31	4420.87	9460.32	11271.5	272.84
	360	270.106	2340.81	4784.06	9827.93	11555.1	296.325
	370	268.166	2263.65	4650.8	10000.8	11871.2	275.227
	380	244.407	2414.04	4878.4	10269.9	12485.3	276.9
	390	259.337	2489.64	4776.81	10585.6	12671.8	297.634
	400	318.542	2556.67	5164.45	10829.1	12784.6	308.144
	410	306.751	2514.13	5103.47	10870.5	13156.8	297.362
	420	338.143	2622.16	5136.4	11110.5	13499	284.996
	430	319.047	2581.63	5266.67	11275.4	13833.5	270.745
	440	343.235	2826.05	5351.87	11573.1	13841.7	285.315
	450	355.84	2858.56	5366.98	12257	14010.1	287.826
	460	355.767	2845.65	5486.45	12379	14834.1	303.817
	470	356.509	2783.49	5761.21	12259.7	15048.1	316.224
	480	342.557	2860.4	5485.18	13104	15314.5	315.354
	490	393.558	3145.74	5698	13296.5	15481.6	317.601
	500	390.371	3022.43	5923.7	13329.1	15858.7	334.511
	510	387.725	2996.07	5857.21	13593.5	16148.1	353.085
	520	391.67	3011.97	5920.71	13860.6	16179.3	355.348
	530	433.082	3298.55	5903.03	14089.7	17009.3	361.919
	540	460.95	3343.29	6207.6	14801.3	16973.7	349.488
	550	463.812	3398.09	6136.29	14213.5	17082.8	332.563
	560	461.194	3205.96	6294	14242.9	17514	366.877
	570	471.498	3303.55	6519.75	14470.8	17728.6	362.801
	580	456.56	3449.55	6520.25	15156.1	18282.5	352.973
	590	429.429	3410.33	6412.1	14539	18068.8	351.045
	600	440.126	3456.13	6688.57	15946.4	18302.4	347.257
	610	430.52	3775.98	6723.16	15924.2	18795.4	381.822
	620	467.196	3616.85	6780.81	15869.5	18677.7	400.564
	630	473.058	3737.04	6696.73	16208.3	19414.2	352.143
	640	484.219	3777.46	7153.12	16678.9	19248.3	380.07
	650	486.404	3623.29	7043.93	16401.8	19690.4	371.463
	660	516.558	3649.08	7055.72	16592.7	20092.9	375.208
	670	507.04	3897.84	7115.37	16913.6	20093.3	430.946
	680	509.317	3934.89	7074.13	17379.2	20104.7	419.079
	690	516.377	3929.93	7204.18	17558.9	20938.5	418.26
	700	528.886	3979.36	7249.1	17843.3	20692.9	417.019
	710	541.423	3840.89	7414.97	18072.7	20741.6	420.803
	720	560.964	4035.93	7691.24	18216.5	21056.2	451.221
	730	573.08	4052.95	7764.9	17845.9	21285.9	457.229
	740	580.966	3933.04	7834.89	18784.9	21648.9	450.894
	750	630.889	4128.22	8022.62	18551.3	21685.7	459.907
	760	580.357	4178.91	7976.4	18364.3	21933.3	493.854
	770	632.91	4305.86	7827.31	18880.7	22308.2	462.702
	780	619.748	4040.21	8070.49	18963	22166.8	498.401
	790	647.716	4185.52	8114.28	19887.8	22526.2	513.482
	800	635.175	4324.39	8046.63	19318.1	22718	534.4
	810	654.608	4152	8355.67	19681.2	22996.7	498.237
	820	647.119	4357.67	8383.27	19854.1	23023.8	554.347
	830	659.704	4397	8470.21	19641.8	22966.4	554.371
	840	675.841	4563.9	8444.58	19904	23262.1	538.731
	850	659.11	4593.37	8561.93	20559.4	23572.8	515.394
	860	683.041	4579.52	8703.58	20559.6	23676.1	538.727
	870	692.447	4543.24	8513.85	20899.9	23841.1	505.81
	880	724.06	4452.54	8713.7	20601.4	24077.4	506.381
	890	724.28	4472.55	8738.41	20999.4	24070.8	501.315
	900	752.726	4541.06	8852.36	21560.2	24073	521.997
	910	745.084	4953.15	9070.67	21588.7	24098.4	512.005
	920	745.449	4717.27	8972.44	21532.6	24448.2	529.49
	930	747.49	4956.76	8930.77	21533.4	24734.6	545.473
	940	745.774	4968.86	9135.41	21652.3	24810	530.017
	950	733.305	4822.28	8862.46	22405.1	24581.7	551.537
	960	786.231	4852.86	9164.23	21620.5	25033.7	547.884
	970	789.298	5050.9	9336.92	22642.5	24890.9	536.623
	980	767.504	5029.24	9671.09	22245.6	25074.6	511.402
	990	788.176	4859.84	9382.24	22506.4	25599.9	554.922
	1000	781.127	5029.42	8916.66	22906.7	25956.4	573.448
	1010	781.825	5120.98	9213.94	22907.3	25395.3	571.484
	1020	806.309	5067.43	9358.52	22943.5	26092.6	560.89
	1030	789.442	5237.29	9727.28	23111.5	25639.6	590.697
	1040	774.263	5137.37	9986.91	23022.7	25569.9	575.751
	1050	835.729	5094.66	9534.07	22986.4	25753.1	585.184
	1060	853.278	5097.89	9810.33	23135.3	25917.7	586.865
	1070	829.427	5067.22	9983.14	23684.9	25979.6	586.661
	1080	821.22	5208.62	9845.71	23537.2	25913.7	622.867
	1090	824.623	5062.95	9858.71	22973.9	26208.5	590.298
	1100	808.298	5318.1	9824.19	23579.9	26061.9	603.319
	1110	815.651	5232.79	9826.61	23407.3	26248.3	572.183
	1120	842.829	5403.2	10168	23708.5	26026	660.263
	1130	887.328	5387.25	9878.79	24418.5	26385.1	623.841
	1140	870.393	5369.44	10277.2	24028.9	26471.7	640.923
	1150	858.866	5489.53	10127	24144.6	26475.2	638.679
	1160	917.052	5510.19	10250.9	24250.4	26406	617.207
	1170	902.194	5411.27	10451.7	24923.7	26874.6	655.214
	1180	892.724	5533.81	10366	24191.5	26264.2	636.639
	1190	893.923	5527.8	10617.4	24253	26530.7	649.481
	1200	926.318	5810.69	10039	24245	26297.7	643.262
