# Supplementary material for: Molecular dissection of PI3Kβ synergistic activation by receptor tyrosine kinases, GβGγ, and Rho-family GTPases
Source: eLife. 2024 May 7;12:RP88991. doi: 10.7554/eLife.88991 (PMC11076043; doi:10.7554/eLife.88991)
Supplement: Figure 5—figure supplement 2—source data 3. [file elife-88991-fig5-figsupp2-data3.xlsx]

## Sheet: Fig 5 - FS3B
Figure 5 -	Dy647-PIK3CB activity measured in the presence of either pY alone, GbGg alone, or pY-GbGg
figure supplement 2E
	time [sec]	pY,GbGg	GbGg	pY
	-300	-80.2594	-172.993	-164.515
	-290	-52.2649	-160.603	-141.681
	-280	-54.9883	-156.427	-132.892
	-270	-56.6904	-147.929	-125.773
	-260	-54.1182	-146.236	-109.184
	-250	-69.9423	-137.998	-114.665
	-240	-70.3036	-138.367	-112.986
	-230	-60.5063	-125.863	-94.4978
	-220	-64.4525	-121.415	-94.1255
	-210	-73.3133	-113.878	-80.3218
	-200	-51.5079	-102.407	-62.9597
	-190	-47.9304	-105.539	-78.3186
	-180	-28.836	-103.222	-63.1471
	-170	-62.5132	-94.1818	-54.2891
	-160	-36.8144	-93.0662	-44.5311
	-150	-43.8207	-85.4703	-62.6769
	-140	-42.9186	-88.7215	-55.9789
	-130	-52.0597	-84.5263	-41.0683
	-120	-34.9279	-92.8308	-41.0401
	-110	-29.0043	-73.1142	-57.1936
	-100	-38.0532	-69.521	-28.3727
	-90	-24.4191	-66.3017	-36.5634
	-80	-23.0697	-63.8413	-40.3483
	-70	-44.2017	-60.801	-37.4732
	-60	-28.7586	-52.2795	-23.8495
	-50	-2.69596	-26.5252	-30.6478
	-40	-0.566167	-24.8764	-7.42656
	-30	-9.40363	-7.8666	-14.7821
	-20	-20.8084	-9.43089	-6.00002
	-10	-28.2067	-1.90859	-2.63512
	0	0.000384102	0.000178637	-7.4476e-06
	10	81.8873	6.72807	20.5727
	20	522.87	5.051	8.2445
	30	691.235	5.53034	2.14041
	40	1020.98	11.6208	23.3609
	50	1197.21	15.518	29.7209
	60	1397.83	18.4234	9.79348
	70	1620.32	12.8847	-0.891438
	80	1904.47	24.645	21.9
	90	2239.01	31.7137	15.3135
	100	2499.08	33.4104	29.0278
	110	2778.2	30.9181	30.4837
	120	3100.21	38.4882	47.9977
	130	3419.43	42.1525	50.465
	140	3679.04	45.2112	68.3083
	150	4002.18	50.8235	82.0496
	160	4284.42	47.7109	80.3855
	170	4669.21	52.4086	110.278
	180	4988.73	56.9507	122.428
	190	5321.87	55.113	138.373
	200	5463.11	59.8083	165.073
	210	5882.39	65.3213	165.059
	220	6479.83	59.698	173.288
	230	6563.83	69.2443	170.11
	240	6843.45	64.2106	202.587
	250	7175.73	70.7681	180.04
	260	7619.49	67.235	216.429
	270	8110.62	72.482	257.405
	280	8224.38	70.4592	303.539
	290	8659.07	76.5667	282.426
	300	9106.84	78.1114	313.86
	310	9293.71	87.4689	326.161
	320	9727.85	84.9006	359.636
	330	10115.7	83.3559	367.691
	340	10337.2	84.3146	379.317
	350	10960.4	86.9896	401.815
	360	10885.8	84.7633	390.203
	370	11483.9	89.9416	446.102
	380	11779.1	88.5171	448.964
	390	12024.9	97.9138	493.38
	400	12471	95.473	522.114
	410	13016	97.7753	502.5
	420	12973.3	92.3028	502.559
	430	13643.5	89.857	571.31
	440	13782.5	90.7765	550.276
	450	14072.7	105.369	588.125
	460	14322.5	105.707	596.21
	470	14673.2	100.775	615.851
	480	15122.2	101.561	618.039
	490	15253.4	114.091	640.955
	500	15403.4	112.38	681.589
	510	15804.2	114.754	662.866
	520	16064.1	112.529	704.97
	530	16581.4	113.017	735.087
	540	16745.4	115.32	782.294
	550	17003.6	122.404	785.51
	560	17440.7	112.81	774.167
	570	17433.6	132.179	796.575
	580	17795.6	124.607	786.977
	590	18030.2	125.972	824.145
	600	18250.1	129.99	825.672
	610	18837.1	127.167	878.026
	620	19212.9	129.386	858.933
	630	19223.7	132.34	878.157
	640	19533.8	129.048	892.436
	650	19982.9	129.374	890.22
	660	20252.8	130.049	939.858
	670	20528.5	135.135	979.696
	680	20674.6	133.608	999.124
	690	20659.7	139.725	1004.39
	700	21074	140.409	1039.03
	710	21230	136.19	1062.69
	720	21352	137.695	1054.52
	730	21613.9	151.223	1058.32
	740	21916.6	143.599	1135.17
	750	22206.9	150.84	1076.64
	760	22565.6	150.108	1161.87
	770	22421.2	148.438	1209.87
	780	22944.4	145.053	1178.36
	790	23275.1	146.393	1248.03
	800	23188.8	153.956	1202.08
	810	23140.6	146.006	1270.8
	820	23171	154.612	1269.24
	830	23617.7	154.867	1269.21
	840	23614.4	150.626	1381.54
	850	24275.9	155.944	1362.63
	860	24379.8	151.92	1361.15
	870	24189	159.158	1397.53
	880	24087.9	154.45	1361.67
	890	24322.6	165.032	1443
	900	24471.6	158.672	1348.67
	910	24606.8	158.205	1441.04
	920	24482.7	161.714	1473.9
	930	24809.8	166.576	1486.78
	940	24985.5	160.936	1449.08
	950	25044	166.083	1488.11
	960	25131.5	166.703	1471.1
	970	25397.8	163.15	1526.77
	980	25176.5	173.961	1534.97
	990	25284.5	168.345	1538.18
	1000	25707.7	171.121	1569.58
	1010	25280.9	169.415	1576.62
	1020	25447.1	167.54	1585.33
	1030	25410.2	174.876	1665.91
	1040	25812.4	184.114	1602.7
	1050	25819.3	174.974	1633.22
	1060	25754.5	182.941	1587.66
	1070	26096.5	182.849	1656.19
	1080	25844.2	186.202	1672.83
	1090	26334.4	185.721	1717.14
	1100	25860.8	190.61	1762.46
	1110	26106.5	185.417	1695.96
	1120	26027.7	182.652	1735.95
	1130	26166.6	182.867	1821.12
	1140	26297.5	183.805	1889.72
	1150	26062.3	183.98	1859.45
	1160	26212.3	193.49	1821.25
	1170	26567.7	187.025	1820.99
	1180	26375.6	186.817	1822.23
	1190	26499.3	188.721	1855.74
	1200	26673.4	195.451	1873.46
	1210	26645.2	193.936	1901.21
	1220	26675.9	190.827	1862.1
	1230	26590.2	194.17	1857.39
	1240	26556.7	192.217	1938.13
	1250	27024.4	188.819	1936.02
	1260	27199.7	195.641	1972
	1270	27062	192.866	2019.28
	1280	27211.8	191.903	1972.05
	1290	26885.1	191.417	1994.57
	1300	27080.6	193.501	1989.26
	1310	26887.1	197.312	2049.04
	1320	26960.2	201.23	2020.16
	1330	26963.5	196.802	2021.95
	1340	27170.1	197.81	2073.86
	1350	27144.8	202.174	2131.78
	1360	27238.2	199.931	2132.31
	1370	26960.6	204.809	2244.95
	1380	27220	200.667	2111.92
	1390	27292.5	210.186	2271.73
	1400	27197.9	206.266	2202.43
	1410	27212	180.242	2255.91
	1420	27362.9	198.514	2240.07
	1430	27380.6	200.346	2247.04
	1440	27609.2	207.436	2275.5
	1450	27265.4	209.787	2294.54
	1460	27272	206.342	2364.42
	1470	27371.8	213.565	2311.86
	1480	27222.3	216.459	2364.53
	1490	27669.7	223.113	2316.14
	1500	27640.8	215.816	2282.3
